# Supplementary material for: Nicotine promotes neuron survival and partially protects from Parkinson’s disease by suppressing SIRT6
Source: Acta Neuropathol Commun. 2018 Nov 8;6:120. doi: 10.1186/s40478-018-0625-y (PMC6223043; doi:10.1186/s40478-018-0625-y)
Supplement: Supplementary file 4 — RNAseq WT vs BSKO mice. (XLSX 2649 kb) [file 40478_2018_625_MOESM4_ESM.xlsx]

## Sheet: gene_exp_adam_WTvsKO.diff
test_id	gene_id	gene	locus	sample_1	sample_2	status	value_1	value_2	log2(fold_change)	test_stat	p_value	q_value	significant		Down regulated in Sirt6 KO mice:			Up regulated in Sirt6 KO mice:
XLOC_003837	XLOC_003837	Fat2	11:55250609-55312257	q1	q2	OK	21.3444	0.0654957	-8.34824	-7.68416	5e-05	0.00907059	yes		XLOC_003837	Fat2		XLOC_026125	Cdkl5
XLOC_007314	XLOC_007314	Cbln3	14:55878919-55884256	q1	q2	OK	122.346	0.382333	-8.32193	-8.19789	5e-05	0.00907059	yes		XLOC_007314	Cbln3		XLOC_007968	Pde1b
XLOC_003750	XLOC_003750	Gabra6	11:42306436-42321051	q1	q2	OK	97.7576	0.681489	-7.16438	-7.43958	5e-05	0.00907059	yes		XLOC_003750	Gabra6		XLOC_015386	Lrrc7
XLOC_017073	XLOC_017073	En2	5:28165695-28172166	q1	q2	OK	16.7269	0.307049	-5.76755	-5.49089	5e-05	0.00907059	yes		XLOC_017073	En2		XLOC_023774	2900052N01Rik
XLOC_016168	XLOC_016168	Car8	4:8141492-8239041	q1	q2	OK	107.353	2.80684	-5.25727	-6.37727	5e-05	0.00907059	yes		XLOC_016168	Car8		XLOC_009330	Pde10a
XLOC_018767	XLOC_018767	Ppp1r17	6:56017514-56032688	q1	q2	OK	43.8025	1.27433	-5.1032	-5.61429	5e-05	0.00907059	yes		XLOC_018767	Ppp1r17		XLOC_008693	Adcy5
XLOC_009893	XLOC_009893	Arhgef33	17:80307406-80388689	q1	q2	OK	17.0481	0.630474	-4.75703	-4.76685	5e-05	0.00907059	yes		XLOC_009893	Arhgef33		XLOC_005323	Tmem90a
XLOC_023403	XLOC_023403	Kcng4	8:119623853-119635680	q1	q2	OK	21.7647	0.90919	-4.58126	-5.51248	5e-05	0.00907059	yes		XLOC_023403	Kcng4		XLOC_022567	Rasd2
XLOC_003840	XLOC_003840	Glra1	11:55514812-55607790	q1	q2	OK	15.8763	0.802628	-4.306	-4.43307	5e-05	0.00907059	yes		XLOC_003840	Glra1		XLOC_000560	Rxrg
XLOC_000033	XLOC_000033	Tfap2b	1:19208913-19238734	q1	q2	OK	3.85248	0.210133	-4.19641	-4.74583	5e-05	0.00907059	yes		XLOC_000033	Tfap2b		XLOC_001683	Adora2a
XLOC_023251	XLOC_023251	Cbln1	8:87468852-87472592	q1	q2	OK	135.458	7.90819	-4.09836	-5.55801	5e-05	0.00907059	yes		XLOC_023251	Cbln1		XLOC_020851	Gpr26
XLOC_013431	XLOC_013431	Neurod1	2:79452640-79456636	q1	q2	OK	55.6205	4.65728	-3.57806	-4.80679	5e-05	0.00907059	yes		XLOC_013431	Neurod1		XLOC_004428	Rgs9
XLOC_020296	XLOC_020296	Klk6	7:43824543-43832027	q1	q2	OK	26.8327	2.61487	-3.35918	-4.05341	5e-05	0.00907059	yes		XLOC_020296	Klk6		XLOC_006210	Drd1a
XLOC_017696	XLOC_017696	Grid2ip	5:143357337-143391798	q1	q2	OK	8.12322	0.792406	-3.35774	-3.78262	5e-05	0.00907059	yes		XLOC_017696	Grid2ip		XLOC_023785	Drd2
XLOC_008222	XLOC_008222	Pvalb	15:78191116-78206351	q1	q2	OK	373.352	36.9315	-3.33761	-4.99525	5e-05	0.00907059	yes		XLOC_008222	Pvalb		XLOC_002393	Gng7
XLOC_003086	XLOC_003086	Atp2a3	11:72961168-72993043	q1	q2	OK	25.0933	2.48296	-3.33717	-4.92377	5e-05	0.00907059	yes		XLOC_003086	Atp2a3		XLOC_019819	Grin2b
XLOC_021670	XLOC_021670	Il16	7:83643062-83735490	q1	q2	OK	14.9382	1.61729	-3.20736	-4.30227	5e-05	0.00907059	yes		XLOC_021670	Il16		XLOC_015253	Gpr88
XLOC_009609	XLOC_009609	H2-Ab1	17:34263226-34269418	q1	q2	OK	21.474	2.64332	-3.02217	-3.4083	5e-05	0.00907059	yes		XLOC_009609	H2-Ab1		XLOC_001089	Zranb3
XLOC_019036	XLOC_019036	A2m	6:121636172-121679238	q1	q2	OK	8.4734	1.0729	-2.98142	-4.00188	5e-05	0.00907059	yes		XLOC_019036	A2m		XLOC_005412	Serpina9
XLOC_004805	XLOC_004805	3830431G21Rik	12:80686374-80724216	q1	q2	OK	12.5947	1.62833	-2.95135	-3.93423	5e-05	0.00907059	yes		XLOC_004805	3830431G21Rik		XLOC_001452	Esr1
XLOC_000444	XLOC_000444	Syt2	1:134646680-134749417	q1	q2	OK	51.6976	6.93292	-2.89856	-4.20165	5e-05	0.00907059	yes		XLOC_000444	Syt2		XLOC_007161	Cdhr1
XLOC_024722	XLOC_024722	Zic1	9:91360344-91365799	q1	q2	OK	77.3074	10.6081	-2.86545	-3.95086	5e-05	0.00907059	yes		XLOC_024722	Zic1		XLOC_012350	Myo3b
XLOC_010780	XLOC_010780	Cd74	18:60803848-60812652	q1	q2	OK	63.9988	9.43807	-2.76148	-3.6711	5e-05	0.00907059	yes		XLOC_010780	Cd74		XLOC_005429	Bcl11b
XLOC_012513	XLOC_012513	Mybpc3	2:91118143-91136516	q1	q2	OK	7.53329	1.16938	-2.68754	-3.3682	5e-05	0.00907059	yes		XLOC_012513	Mybpc3		XLOC_011707	Lrrc10b
XLOC_011091	XLOC_011091	Cep76	18:67617396-67641336	q1	q2	OK	13.638	2.31316	-2.5597	-3.5923	5e-05	0.00907059	yes		XLOC_011091	Cep76		XLOC_002684	Sec14l3
XLOC_002317	XLOC_002317	Col18a1	10:77052178-77166530	q1	q2	OK	8.13016	1.38405	-2.55439	-3.5557	5e-05	0.00907059	yes		XLOC_002317	Col18a1		XLOC_003641	Pgam2
XLOC_010944	XLOC_010944	D0H4S114	18:33437018-33464029	q1	q2	OK	236.822	41.2284	-2.52209	-3.55889	5e-05	0.00907059	yes		XLOC_010944	D0H4S114		XLOC_017119	Fosl2
XLOC_006674	XLOC_006674	Gdf10	14:33923586-33935285	q1	q2	OK	23.4499	4.08887	-2.51981	-3.52983	5e-05	0.00907059	yes		XLOC_006674	Gdf10		XLOC_003348	Ppp1r1b
XLOC_007003	XLOC_007003	Zic2	14:122475383-122480328	q1	q2	OK	40.2421	7.09771	-2.50328	-3.80479	5e-05	0.00907059	yes		XLOC_007003	Zic2		XLOC_013731	Gm1337
XLOC_018793	XLOC_018793	Grid2	6:63256856-64666279	q1	q2	OK	20.9506	3.76872	-2.47485	-3.50335	5e-05	0.00907059	yes		XLOC_018793	Grid2		XLOC_005509	Gng4
XLOC_001732	XLOC_001732	Slc1a6	10:78780495-78814825	q1	q2	OK	34.2663	6.1822	-2.4706	-3.64762	5e-05	0.00907059	yes		XLOC_001732	Slc1a6		XLOC_013722	Meis2
XLOC_017382	XLOC_017382	Spp1	5:104435110-104441053	q1	q2	OK	57.3749	10.4958	-2.45061	-3.60053	5e-05	0.00907059	yes		XLOC_017382	Spp1		XLOC_017992	Gabra2
XLOC_015678	XLOC_015678	Inadl	4:98395825-98719603	q1	q2	OK	23.4758	4.70171	-2.31992	-3.58305	5e-05	0.00907059	yes		XLOC_015678	Inadl		XLOC_005993	Actn2
XLOC_011995	XLOC_011995	Fam107b	2:3713457-3782134	q1	q2	OK	22.891	5.12685	-2.15864	-3.19659	5e-05	0.00907059	yes		XLOC_011995	Fam107b		XLOC_019722	Kcna5
XLOC_009484	XLOC_009484	Gng13	17:25717171-25727415	q1	q2	OK	210.184	47.5246	-2.14491	-3.08865	5e-05	0.00907059	yes		XLOC_009484	Gng13		XLOC_008118	Kcnq3
XLOC_019650	XLOC_019650	Ret	6:118151747-118197744	q1	q2	OK	6.13065	1.45929	-2.07077	-2.86947	5e-05	0.00907059	yes		XLOC_019650	Ret		XLOC_014561	Syt6
XLOC_023803	XLOC_023803	Exph5	9:53301669-53381158	q1	q2	OK	9.43823	2.32305	-2.0225	-3.07053	5e-05	0.00907059	yes		XLOC_023803	Exph5		XLOC_017434	Mn1
XLOC_016731	XLOC_016731	Rps6ka1	4:133847289-133887799	q1	q2	OK	18.7917	4.99202	-1.9124	-2.98614	5e-05	0.00907059	yes		XLOC_016731	Rps6ka1		XLOC_000229	Accn4
XLOC_015402	XLOC_015402	Chd7	4:8734908-8866810	q1	q2	OK	8.59972	2.31418	-1.89379	-2.96016	5e-05	0.00907059	yes		XLOC_015402	Chd7		XLOC_002115	Slc35d3
XLOC_010127	XLOC_010127	Grm4	17:27422386-27503304	q1	q2	OK	41.668	11.2571	-1.88811	-2.85718	5e-05	0.00907059	yes		XLOC_010127	Grm4		XLOC_001562	9030224M15Rik
XLOC_014843	XLOC_014843	Trpc3	3:36620481-36690167	q1	q2	OK	16.671	4.60902	-1.85481	-2.89783	5e-05	0.00907059	yes		XLOC_014843	Trpc3		XLOC_024166	Dclk3
XLOC_000855	XLOC_000855	Stk17b	1:53755511-53785215	q1	q2	OK	12.2074	3.4382	-1.82803	-2.67098	5e-05	0.00907059	yes		XLOC_000855	Stk17b		XLOC_024921	Tmem158
XLOC_010206	XLOC_010206	H2-K1	17:33996011-34000333	q1	q2	OK	65.6019	18.8382	-1.80008	-2.96574	5e-05	0.00907059	yes		XLOC_010206	H2-K1		XLOC_015557	Nr4a3
XLOC_007120	XLOC_007120	Prkcd	14:30595353-30626208	q1	q2	OK	22.9324	6.66041	-1.78371	-3.01573	5e-05	0.00907059	yes		XLOC_007120	Prkcd		XLOC_000707	Lamb3
XLOC_020111	XLOC_020111	Tmem145	7:25306107-25316195	q1	q2	OK	33.9936	10.0036	-1.76474	-3.05356	5e-05	0.00907059	yes		XLOC_020111	Tmem145		XLOC_016498	Pcsk9
XLOC_004246	XLOC_004246	Plxdc1	11:97923236-97986446	q1	q2	OK	16.0279	4.80403	-1.73827	-2.78622	5e-05	0.00907059	yes		XLOC_004246	Plxdc1		XLOC_002473	4930485B16Rik
XLOC_004462	XLOC_004462	Grin2c	11:115249168-115267243	q1	q2	OK	32.6322	10.481	-1.63852	-2.7297	5e-05	0.00907059	yes		XLOC_004462	Grin2c		XLOC_005891	Gm2373
XLOC_026125	XLOC_026125	Cdkl5	X:160768012-160994681	q1	q2	OK	6.40557	19.2672	1.58875	2.7367	5e-05	0.00907059	yes		XLOC_018142	Barhl2		XLOC_002118	Pde7b
XLOC_007968	XLOC_007968	Pde1b	15:103503297-103530052	q1	q2	OK	68.8485	232.389	1.75504	2.78193	5e-05	0.00907059	yes		XLOC_007153	Sncg		XLOC_010147	Cpne5
XLOC_015386	XLOC_015386	Lrrc7	3:158084438-158562221	q1	q2	OK	4.01655	14.095	1.81115	3.03089	5e-05	0.00907059	yes		XLOC_002452	Mybpc1		XLOC_019593	Foxp1
XLOC_023774	XLOC_023774	2900052N01Rik	9:46913602-46927366	q1	q2	OK	10.227	37.4537	1.87272	3.09931	5e-05	0.00907059	yes		XLOC_004191	Epn3		XLOC_022184	Th
XLOC_009330	XLOC_009330	Pde10a	17:8801744-8986648	q1	q2	OK	18.1124	66.7676	1.88217	3.20498	5e-05	0.00907059	yes		XLOC_000919	Mreg
XLOC_008693	XLOC_008693	Adcy5	16:35155635-35304549	q1	q2	OK	31.6869	118.402	1.90174	3.13065	5e-05	0.00907059	yes		XLOC_001052	Rnf152
XLOC_005323	XLOC_005323	Tmem90a	12:84677277-84698807	q1	q2	OK	13.2047	49.5831	1.90879	3.4098	5e-05	0.00907059	yes		XLOC_018021	Hopx
XLOC_022567	XLOC_022567	Rasd2	8:75213943-75224113	q1	q2	OK	31.7629	121.392	1.93426	3.24523	5e-05	0.00907059	yes		XLOC_022637	Gm2694
XLOC_000560	XLOC_000560	Rxrg	1:167598361-167639623	q1	q2	OK	5.74313	23.6767	2.04356	2.96794	5e-05	0.00907059	yes		XLOC_018137	Gbp6
XLOC_001683	XLOC_001683	Adora2a	10:75316942-75334788	q1	q2	OK	9.54036	41.4322	2.11864	3.22417	5e-05	0.00907059	yes		XLOC_009610	H2-Eb1
XLOC_020851	XLOC_020851	Gpr26	7:131966459-131985633	q1	q2	OK	5.26345	24.5928	2.22415	3.56031	5e-05	0.00907059	yes		XLOC_000008	St18
XLOC_004428	XLOC_004428	Rgs9	11:109225354-109298181	q1	q2	OK	16.4261	78.1484	2.25022	3.04231	5e-05	0.00907059	yes		XLOC_022873	Trim67
XLOC_006210	XLOC_006210	Drd1a	13:54051182-54055658	q1	q2	OK	4.80366	24.4326	2.3466	3.34963	5e-05	0.00907059	yes		XLOC_023886	Megf11
XLOC_023785	XLOC_023785	Drd2	9:49340661-49407214	q1	q2	OK	7.11747	37.2461	2.38765	3.5958	5e-05	0.00907059	yes		XLOC_024326	Kank2
XLOC_002393	XLOC_002393	Gng7	10:80948623-81014925	q1	q2	OK	39.854	221.226	2.47272	3.67499	5e-05	0.00907059	yes		XLOC_018973	Cpne9
XLOC_019819	XLOC_019819	Grin2b	6:135729794-136173511	q1	q2	OK	1.9785	11.1192	2.49057	4.17599	5e-05	0.00907059	yes		XLOC_024342	Anln
XLOC_015253	XLOC_015253	Gpr88	3:116249653-116253484	q1	q2	OK	25.4306	145.998	2.52131	3.87362	5e-05	0.00907059	yes		XLOC_022112	Ebf3
XLOC_001089	XLOC_001089	Zranb3	1:127954185-128102408	q1	q2	OK	1.72713	12.7301	2.88179	4.2093	5e-05	0.00907059	yes		XLOC_011951	Afap1l2
XLOC_005412	XLOC_005412	Serpina9	12:103996619-104013652	q1	q2	OK	1.47654	13.9447	3.23943	3.75641	5e-05	0.00907059	yes		XLOC_010903	Zfp521
XLOC_001452	XLOC_001452	Esr1	10:4612045-5003761	q1	q2	OK	0.712713	9.51112	3.73822	4.8091	5e-05	0.00907059	yes		XLOC_015282	Ndst3
XLOC_007161	XLOC_007161	Cdhr1	14:37077848-37098311	q1	q2	OK	0.94688	13.3648	3.81911	4.43681	5e-05	0.00907059	yes		XLOC_007896	Prph
XLOC_012350	XLOC_012350	Myo3b	2:70039125-70429195	q1	q2	OK	0.1786	4.50093	4.65542	4.8362	5e-05	0.00907059	yes		XLOC_018753	Chn2
XLOC_004422	XLOC_004422	Cacng1	11:107703217-107716476	q1	q2	OK	0	1.03596	inf	#NAME?	5e-05	0.00907059	yes		XLOC_011225	Cdc42bpg
XLOC_005426	XLOC_005426	1700121N20Rik	12:106442651-106447666	q1	q2	OK	0	0.835734	inf	#NAME?	5e-05	0.00907059	yes		XLOC_018475	Flt3
XLOC_002549	XLOC_002549	Iltifb	10:118289628-118295038	q1	q2	OK	2.77306	0	#NAME?	#NAME?	5e-05	0.00907059	yes		XLOC_017772	Steap2
XLOC_003316	XLOC_003316	Hoxb8	11:96281904-96285325	q1	q2	OK	1.6225	0	#NAME?	#NAME?	5e-05	0.00907059	yes		XLOC_012120	Tprn
XLOC_003318	XLOC_003318	Hoxb6	11:96299170-96301569	q1	q2	OK	1.92169	0	#NAME?	#NAME?	5e-05	0.00907059	yes		XLOC_009580	Adamts10
XLOC_003322	XLOC_003322	Hoxb3	11:96323125-96347930	q1	q2	OK	2.12654	0	#NAME?	#NAME?	5e-05	0.00907059	yes		XLOC_010449	C3
XLOC_003323	XLOC_003323	Hoxb2	11:96351631-96354016	q1	q2	OK	1.85402	0	#NAME?	#NAME?	5e-05	0.00907059	yes		XLOC_010216	H2-Aa
XLOC_003731	XLOC_003731	Tlx3	11:33200751-33203588	q1	q2	OK	3.05016	0	#NAME?	#NAME?	5e-05	0.00907059	yes		XLOC_004851	Ttll5
XLOC_004335	XLOC_004335	Hcrt	11:100761692-100762931	q1	q2	OK	7.14666	0	#NAME?	#NAME?	5e-05	0.00907059	yes		XLOC_013348	Ermn
XLOC_007963	XLOC_007963	Hoxc4	15:103034394-103036852	q1	q2	OK	2.51059	0	#NAME?	#NAME?	5e-05	0.00907059	yes		XLOC_024331	Rgl3
XLOC_013764	XLOC_013764	Tgm5	2:121046110-121085759	q1	q2	OK	0.706298	0	#NAME?	#NAME?	5e-05	0.00907059	yes		XLOC_001697	S100b
XLOC_015172	XLOC_015172	Sycp1	3:102818498-102936100	q1	q2	OK	2.0993	0	#NAME?	#NAME?	5e-05	0.00907059	yes		XLOC_022339	Ank1
XLOC_016395	XLOC_016395	Ambp	4:63143278-63154142	q1	q2	OK	1.16415	0	#NAME?	#NAME?	5e-05	0.00907059	yes		XLOC_019084	Vamp1
XLOC_017984	XLOC_017984	Phox2b	5:67094396-67099126	q1	q2	OK	0.910403	0	#NAME?	#NAME?	5e-05	0.00907059	yes		XLOC_012757	Plcb4
XLOC_019379	XLOC_019379	Hoxa2	6:52162510-52164831	q1	q2	OK	0.951669	0	#NAME?	#NAME?	5e-05	0.00907059	yes		XLOC_018055	Igj
XLOC_020391	XLOC_020391	Slc6a5	7:49910298-49959493	q1	q2	OK	15.1909	0	#NAME?	#NAME?	5e-05	0.00907059	yes		XLOC_016355	Svep1
XLOC_018142	XLOC_018142	Barhl2	5:106452522-106458166	q1	q2	OK	7.05782	0.641247	-3.46027	-3.69591	0.0001	0.0157347	yes		XLOC_022843	Cdh15
XLOC_007153	XLOC_007153	Sncg	14:34370273-34374669	q1	q2	OK	39.5883	4.62507	-3.09753	-3.57582	0.0001	0.0157347	yes		XLOC_009606	Psmb8
XLOC_002452	XLOC_002452	Mybpc1	10:88518278-88605152	q1	q2	OK	4.70278	0.725623	-2.69622	-3.18509	0.0001	0.0157347	yes		XLOC_016749	Ldlrap1
XLOC_004191	XLOC_004191	Epn3	11:94489598-94499974	q1	q2	OK	4.87242	0.757577	-2.68517	-3.22723	0.0001	0.0157347	yes
XLOC_000919	XLOC_000919	Mreg	1:72159232-72212307	q1	q2	OK	7.78086	1.67449	-2.21621	-2.82725	0.0001	0.0157347	yes
XLOC_001052	XLOC_001052	Rnf152	1:105276916-105361629	q1	q2	OK	9.18658	2.43885	-1.91333	-2.90954	0.0001	0.0157347	yes
XLOC_018021	XLOC_018021	Hopx	5:77086985-77115123	q1	q2	OK	91.5364	25.2379	-1.85875	-3.02861	0.0001	0.0157347	yes
XLOC_005429	XLOC_005429	Bcl11b	12:107910402-108003414	q1	q2	OK	7.5818	25.69	1.7606	2.74123	0.0001	0.0157347	yes
XLOC_011707	XLOC_011707	Lrrc10b	19:10455370-10457447	q1	q2	OK	11.7865	61.4355	2.38193	3.64893	0.0001	0.0157347	yes
XLOC_002684	XLOC_002684	Sec14l3	11:4064852-4078990	q1	q2	OK	0.686405	4.65504	2.76166	3.38149	0.0001	0.0157347	yes
XLOC_003641	XLOC_003641	Pgam2	11:5801636-5803796	q1	q2	OK	3.48032	34.2697	3.29964	3.85992	0.0001	0.0157347	yes
XLOC_005409	XLOC_005409	Serpina1c	12:103894925-103904950	q1	q2	OK	1.01619	0	#NAME?	#NAME?	0.0001	0.0157347	yes
XLOC_009033	XLOC_009033	Uts2d	16:27353321-27370239	q1	q2	OK	1.11097	0	#NAME?	#NAME?	0.0001	0.0157347	yes
XLOC_022637	XLOC_022637	Gm2694	8:87472811-87525554	q1	q2	OK	23.4956	2.22175	-3.40262	-3.42195	0.00015	0.0208378	yes
XLOC_018137	XLOC_018137	Gbp6	5:105270701-105293699	q1	q2	OK	3.06394	0.467761	-2.71155	-2.97026	0.00015	0.0208378	yes
XLOC_009610	XLOC_009610	H2-Eb1	17:34305866-34316674	q1	q2	OK	15.3776	2.68621	-2.51719	-3.09259	0.00015	0.0208378	yes
XLOC_000008	XLOC_000008	St18	1:6487230-6860940	q1	q2	OK	9.69948	2.46025	-1.9791	-2.82904	0.00015	0.0208378	yes
XLOC_022873	XLOC_022873	Trim67	8:124793018-124834704	q1	q2	OK	4.5294	1.19208	-1.92584	-2.77575	0.00015	0.0208378	yes
XLOC_023886	XLOC_023886	Megf11	9:64385625-64709205	q1	q2	OK	16.4076	4.85341	-1.75729	-2.85309	0.00015	0.0208378	yes
XLOC_024326	XLOC_024326	Kank2	9:21766772-21798546	q1	q2	OK	13.1785	3.9616	-1.73403	-2.68758	0.00015	0.0208378	yes
XLOC_018973	XLOC_018973	Cpne9	6:113282306-113305571	q1	q2	OK	22.5003	6.87089	-1.71138	-2.88242	0.00015	0.0208378	yes
XLOC_024342	XLOC_024342	Anln	9:22331213-22389206	q1	q2	OK	14.9538	4.99135	-1.58301	-2.71072	0.00015	0.0208378	yes
XLOC_017119	XLOC_017119	Fosl2	5:32136471-32157840	q1	q2	OK	3.67774	11.0892	1.59227	2.74679	0.00015	0.0208378	yes
XLOC_003348	XLOC_003348	Ppp1r1b	11:98348737-98358283	q1	q2	OK	125.032	407.363	1.70401	2.717	0.00015	0.0208378	yes
XLOC_013731	XLOC_013731	Gm1337	2:118699102-118703963	q1	q2	OK	4.87087	19.7408	2.01893	3.07635	0.00015	0.0208378	yes
XLOC_016338	XLOC_016338	Rps15a-ps8	4:53791030-53793339	q1	q2	OK	0	1.22827	inf	#NAME?	0.00015	0.0208378	yes
XLOC_022112	XLOC_022112	Ebf3	7:137193670-137314445	q1	q2	OK	3.46043	0.513162	-2.75346	-3.07189	0.0002	0.0254876	yes
XLOC_011951	XLOC_011951	Afap1l2	19:56912353-57008575	q1	q2	OK	10.125	2.80236	-1.8532	-2.7319	0.0002	0.0254876	yes
XLOC_010903	XLOC_010903	Zfp521	18:13687012-13972733	q1	q2	OK	10.1302	3.06005	-1.72703	-2.64026	0.0002	0.0254876	yes
XLOC_015282	XLOC_015282	Ndst3	3:123526165-123672392	q1	q2	OK	12.0939	4.40557	-1.45688	-2.47037	0.0002	0.0254876	yes
XLOC_005509	XLOC_005509	Gng4	13:13784538-13827895	q1	q2	OK	13.3135	38.4778	1.53114	2.61092	0.0002	0.0254876	yes
XLOC_013722	XLOC_013722	Meis2	2:115861263-116065058	q1	q2	OK	17.9795	53.4886	1.57288	2.71505	0.0002	0.0254876	yes
XLOC_017992	XLOC_017992	Gabra2	5:70961056-71095849	q1	q2	OK	12.6345	40.1313	1.66736	2.9743	0.0002	0.0254876	yes
XLOC_005993	XLOC_005993	Actn2	13:12269425-12340732	q1	q2	OK	3.83756	16.8644	2.13572	3.09855	0.0002	0.0254876	yes
XLOC_019722	XLOC_019722	Kcna5	6:126532550-126535555	q1	q2	OK	1.47963	7.5377	2.34889	2.92797	0.0002	0.0254876	yes
XLOC_018287	XLOC_018287	Hpd	5:123171806-123182686	q1	q2	OK	0.819984	0	#NAME?	#NAME?	0.0002	0.0254876	yes
XLOC_007896	XLOC_007896	Prph	15:99055173-99058978	q1	q2	OK	5.77769	0.212922	-4.7621	-3.81451	0.00025	0.0283456	yes
XLOC_018753	XLOC_018753	Chn2	6:54039931-54430221	q1	q2	OK	82.4358	20.1955	-2.02924	-2.9513	0.00025	0.0283456	yes
XLOC_011225	XLOC_011225	Cdc42bpg	19:6306456-6325652	q1	q2	OK	5.54009	1.42691	-1.95702	-2.79559	0.00025	0.0283456	yes
XLOC_018475	XLOC_018475	Flt3	5:147330740-147400489	q1	q2	OK	6.51705	1.71316	-1.92756	-2.67513	0.00025	0.0283456	yes
XLOC_017772	XLOC_017772	Steap2	5:5664830-5694568	q1	q2	OK	6.73271	2.06297	-1.70647	-2.63633	0.00025	0.0283456	yes
XLOC_012120	XLOC_012120	Tprn	2:25262597-25269886	q1	q2	OK	22.4551	7.43383	-1.59486	-2.59987	0.00025	0.0283456	yes
XLOC_009580	XLOC_009580	Adamts10	17:33524195-33553782	q1	q2	OK	14.5109	4.8852	-1.57065	-2.62283	0.00025	0.0283456	yes
XLOC_008118	XLOC_008118	Kcnq3	15:65994914-66286224	q1	q2	OK	6.91835	19.6641	1.50707	2.60164	0.00025	0.0283456	yes
XLOC_014561	XLOC_014561	Syt6	3:103575280-103635179	q1	q2	OK	5.77394	17.1342	1.56925	2.72057	0.00025	0.0283456	yes
XLOC_017434	XLOC_017434	Mn1	5:111418165-111457025	q1	q2	OK	3.41338	10.9638	1.68348	2.75146	0.00025	0.0283456	yes
XLOC_000229	XLOC_000229	Accn4	1:75450509-75474340	q1	q2	OK	5.80713	20.7627	1.8381	2.85419	0.00025	0.0283456	yes
XLOC_002115	XLOC_002115	Slc35d3	10:19847916-19851459	q1	q2	OK	2.08725	8.55645	2.03541	2.75273	0.00025	0.0283456	yes
XLOC_001562	XLOC_001562	9030224M15Rik	10:40683281-40811083	q1	q2	OK	0.666732	5.15906	2.95193	2.98368	0.00025	0.0283456	yes
XLOC_005997	XLOC_005997	Prl2c3	13:12790820-12800079	q1	q2	OK	0.891015	0	#NAME?	#NAME?	0.00025	0.0283456	yes
XLOC_018811	XLOC_018811	Fabp1	6:71199887-71205023	q1	q2	OK	2.56372	0	#NAME?	#NAME?	0.00025	0.0283456	yes
XLOC_010449	XLOC_010449	C3	17:57203972-57228136	q1	q2	OK	3.43823	0.175216	-4.29445	-4.23181	0.0003	0.0319034	yes
XLOC_010216	XLOC_010216	H2-Aa	17:34282750-34287771	q1	q2	OK	28.3508	3.59396	-2.97974	-3.28155	0.0003	0.0319034	yes
XLOC_004851	XLOC_004851	Ttll5	12:85824949-86053760	q1	q2	OK	16.2795	5.53225	-1.55712	-2.62395	0.0003	0.0319034	yes
XLOC_013348	XLOC_013348	Ermn	2:58045114-58052752	q1	q2	OK	38.8387	14.1375	-1.45797	-2.60553	0.0003	0.0319034	yes
XLOC_024166	XLOC_024166	Dclk3	9:111439080-111489611	q1	q2	OK	8.77294	24.4725	1.48003	2.5021	0.0003	0.0319034	yes
XLOC_024921	XLOC_024921	Tmem158	9:123259056-123260789	q1	q2	OK	24.2101	74.7761	1.62697	2.70131	0.0003	0.0319034	yes
XLOC_015557	XLOC_015557	Nr4a3	4:48051247-48083352	q1	q2	OK	2.41994	10.4632	2.11228	2.78555	0.0003	0.0319034	yes
XLOC_000707	XLOC_000707	Lamb3	1:193301993-193343878	q1	q2	OK	0.62161	3.15374	2.34298	2.79734	0.0003	0.0319034	yes
XLOC_016498	XLOC_016498	Pcsk9	4:106442333-106464325	q1	q2	OK	1.02207	6.16753	2.5932	3.05855	0.0003	0.0319034	yes
XLOC_024331	XLOC_024331	Rgl3	9:21971526-21989453	q1	q2	OK	8.31617	1.48456	-2.48588	-2.96994	0.00035	0.0362215	yes
XLOC_001697	XLOC_001697	S100b	10:76253835-76261319	q1	q2	OK	223.452	69.9074	-1.67645	-2.73119	0.00035	0.0362215	yes
XLOC_002473	XLOC_002473	4930485B16Rik	10:92880944-93081618	q1	q2	OK	0.79599	3.08777	1.95574	2.78147	0.00035	0.0362215	yes
XLOC_005891	XLOC_005891	Gm2373	13:97434969-97497007	q1	q2	OK	0.442777	3.49861	2.98213	3.16035	0.00035	0.0362215	yes
XLOC_022339	XLOC_022339	Ank1	8:22974881-23150496	q1	q2	OK	35.4469	9.03213	-1.97252	-2.92173	0.0004	0.0397935	yes
XLOC_019084	XLOC_019084	Vamp1	6:125215580-125222306	q1	q2	OK	189.806	50.4076	-1.91281	-2.94596	0.0004	0.0397935	yes
XLOC_012757	XLOC_012757	Plcb4	2:135741829-136013068	q1	q2	OK	32.7968	10.2698	-1.67515	-2.7345	0.0004	0.0397935	yes
XLOC_002118	XLOC_002118	Pde7b	10:20398003-20725068	q1	q2	OK	7.3915	19.9974	1.43588	2.55623	0.0004	0.0397935	yes
XLOC_010147	XLOC_010147	Cpne5	17:29156520-29237790	q1	q2	OK	10.8682	37.2303	1.77636	2.79943	0.0004	0.0397935	yes
XLOC_000938	XLOC_000938	Cryba2	1:74889943-74893135	q1	q2	OK	0.676829	0	#NAME?	#NAME?	0.0004	0.0397935	yes
XLOC_018055	XLOC_018055	Igj	5:88519808-88527897	q1	q2	OK	13.9809	0.226451	-5.94812	-5.30625	0.00045	0.0436415	yes
XLOC_016355	XLOC_016355	Svep1	4:58042795-58206596	q1	q2	OK	1.3585	0.276255	-2.29794	-2.66501	0.00045	0.0436415	yes
XLOC_022843	XLOC_022843	Cdh15	8:122848373-122867397	q1	q2	OK	5.84997	1.41484	-2.04779	-2.50659	0.00045	0.0436415	yes
XLOC_019593	XLOC_019593	Foxp1	6:98925341-99435345	q1	q2	OK	8.66953	21.7492	1.32694	2.3838	0.00045	0.0436415	yes
XLOC_009606	XLOC_009606	Psmb8	17:34198194-34201454	q1	q2	OK	8.99415	1.43001	-2.65296	-2.72705	0.0005	0.0475926	yes
XLOC_016749	XLOC_016749	Ldlrap1	4:134745411-134768004	q1	q2	OK	6.24261	1.33359	-2.22683	-2.67925	0.0005	0.0475926	yes
XLOC_022184	XLOC_022184	Th	7:142892775-142899966	q1	q2	OK	4.1424	15.9186	1.94217	2.6602	0.0005	0.0475926	yes
XLOC_015614	XLOC_015614	Pappa	4:65124173-65357509	q1	q2	OK	0.936033	0.154378	-2.6001	-2.68967	0.00055	0.0514	no
XLOC_007066	XLOC_007066	Rarb	14:16430838-16575210	q1	q2	OK	5.54303	15.5281	1.48613	2.44172	0.00055	0.0514	no
XLOC_004903	XLOC_004903	Slc24a4	12:102129418-102266749	q1	q2	OK	4.35821	18.5746	2.09153	2.94759	0.00055	0.0514	no
XLOC_015588	XLOC_015588	Musk	4:58285961-58374303	q1	q2	OK	0.129127	1.49443	3.53273	2.49877	0.0006	0.0557349	no
XLOC_024756	XLOC_024756	Il20rb	9:100457718-100486473	q1	q2	OK	5.65469	0.269633	-4.39038	-4.03726	0.00065	0.058614	no
XLOC_009653	XLOC_009653	H2-Q7	17:35439154-35443773	q1	q2	OK	6.54793	0.382891	-4.09603	-3.33361	0.00065	0.058614	no
XLOC_008878	XLOC_008878	Sh3bgr	16:96200469-96228933	q1	q2	OK	10.4446	0.914669	-3.51336	-3.27398	0.00065	0.058614	no
XLOC_024602	XLOC_024602	Skor1	9:63138163-63148961	q1	q2	OK	1.9904	0.254434	-2.9677	-2.63108	0.00065	0.058614	no
XLOC_002909	XLOC_002909	Igtp	11:58199555-58207592	q1	q2	OK	10.468	2.01292	-2.37862	-2.83937	0.00065	0.058614	no
XLOC_008598	XLOC_008598	B3gnt5	16:19760233-19772753	q1	q2	OK	2.21417	0.322312	-2.78024	-2.91463	0.0007	0.0609831	no
XLOC_020325	XLOC_020325	Kcnc3	7:44590885-44604751	q1	q2	OK	99.7873	23.0134	-2.11639	-2.89407	0.0007	0.0609831	no
XLOC_014640	XLOC_014640	Pde5a	3:122729157-122859374	q1	q2	OK	6.44143	2.01245	-1.67843	-2.50439	0.0007	0.0609831	no
XLOC_012667	XLOC_012667	B2m	2:122120107-122186189	q1	q2	OK	245.601	89.5838	-1.45501	-2.53698	0.0007	0.0609831	no
XLOC_023338	XLOC_023338	Smpd3	8:106252547-106337988	q1	q2	OK	12.1728	32.0252	1.39555	2.47011	0.0007	0.0609831	no
XLOC_018541	XLOC_018541	Tac1	6:7555070-7562973	q1	q2	OK	30.1369	92.3799	1.61605	2.66767	0.0007	0.0609831	no
XLOC_003501	XLOC_003501	Gprc5c	11:114851531-114872617	q1	q2	OK	8.97836	1.86234	-2.26933	-2.67744	0.00075	0.0646089	no
XLOC_025739	XLOC_025739	Frmd7	X:50892644-50942710	q1	q2	OK	0.534768	3.32097	2.63462	2.96029	0.00075	0.0646089	no
XLOC_009633	XLOC_009633	D17H6S56E-3	17:35016578-35028016	q1	q2	OK	3.81703	0.187454	-4.34784	-3.79107	0.0008	0.0681547	no
XLOC_011163	XLOC_011163	Doc2g	19:4003384-4007005	q1	q2	OK	4.94247	18.8838	1.93384	2.48711	0.0008	0.0681547	no
XLOC_017301	XLOC_017301	Alb	5:90460888-90476603	q1	q2	OK	16.4844	0.331856	-5.6344	-4.84765	0.00085	0.0708486	no
XLOC_014474	XLOC_014474	Lingo4	3:94399218-94404501	q1	q2	OK	3.59277	0.211832	-4.0841	-3.68855	0.00085	0.0708487	no
XLOC_020919	XLOC_020919	Eps8l2	7:141339001-141365110	q1	q2	OK	5.91909	1.15713	-2.35482	-2.53418	0.00085	0.0708487	no
XLOC_002041	XLOC_002041	Itga7	10:128933812-128960988	q1	q2	OK	9.24955	3.0136	-1.6179	-2.53534	0.00085	0.0708487	no
XLOC_013234	XLOC_013234	Barhl1	2:28907679-28916440	q1	q2	OK	2.00374	0.0774244	-4.69376	-3.5029	0.0009	0.0726597	no
XLOC_010414	XLOC_010414	Stap2	17:55997076-56005568	q1	q2	OK	5.877	0.896252	-2.7131	-2.75702	0.0009	0.0726597	no
XLOC_015760	XLOC_015760	Gm12824	4:114406723-114615098	q1	q2	OK	2.03568	0.452724	-2.16881	-2.55241	0.0009	0.0726597	no
XLOC_023821	XLOC_023821	AI118078	9:55326948-55438344	q1	q2	OK	12.1062	3.84545	-1.65452	-2.36574	0.0009	0.0726597	no
XLOC_004688	XLOC_004688	Etv1	12:38780257-38868215	q1	q2	OK	43.3043	15.2425	-1.50641	-2.3768	0.0009	0.0726597	no
XLOC_014079	XLOC_014079	Bcas1	2:170346990-170427845	q1	q2	OK	105.139	42.1282	-1.31945	-2.33764	0.0009	0.0726597	no
XLOC_003230	XLOC_003230	1500016L03Rik	11:84525659-84535831	q1	q2	OK	19.6913	0.97053	-4.34264	-3.62985	0.00095	0.0747398	no
XLOC_024009	XLOC_024009	Zic4	9:91368971-91389348	q1	q2	OK	4.76238	1.26509	-1.91244	-2.48603	0.00095	0.0747398	no
XLOC_015605	XLOC_015605	Col27a1	4:63215411-63334991	q1	q2	OK	3.43902	1.10381	-1.6395	-2.40018	0.00095	0.0747398	no
XLOC_020621	XLOC_020621	Gm19831	7:103826522-103853207	q1	q2	OK	509.182	164.883	-1.62674	-2.30302	0.00095	0.0747398	no
XLOC_001813	XLOC_001813	Tle2	10:81575286-81590845	q1	q2	OK	18.8569	6.91835	-1.44659	-2.43746	0.00095	0.0747398	no
XLOC_003770	XLOC_003770	Irgm1	11:48865248-48871346	q1	q2	OK	10.3209	3.11001	-1.73057	-2.38705	0.001	0.0774874	no
XLOC_009907	XLOC_009907	Six3	17:85620833-85626191	q1	q2	OK	1.99426	7.74332	1.9571	2.55793	0.001	0.0774874	no
XLOC_006651	XLOC_006651	Tnnc1	14:31208311-31211711	q1	q2	OK	4.15214	22.8195	2.45834	2.71896	0.001	0.0774874	no
XLOC_011057	XLOC_011057	Arhgef37	18:61493793-61536536	q1	q2	OK	2.72552	0.45013	-2.59812	-2.71704	0.0011	0.0835567	no
XLOC_025313	XLOC_025313	Gjb1	X:101377336-101385625	q1	q2	OK	22.4617	7.41598	-1.59876	-2.41363	0.0011	0.0835567	no
XLOC_014068	XLOC_014068	Kcng1	2:168261697-168269331	q1	q2	OK	4.42392	14.2713	1.68972	2.47859	0.0011	0.0835567	no
XLOC_006892	XLOC_006892	Egr3	14:70077444-70080157	q1	q2	OK	8.76011	31.3616	1.83998	2.61489	0.0011	0.0835567	no
XLOC_005463	XLOC_005463	Ahnak2,LOC100047183	12:112772192-112808486	q1	q2	OK	2.98434	0.536432	-2.47595	-2.51484	0.00115	0.0869265	no
XLOC_002804	XLOC_002804	Ebf1	11:44618133-45005175	q1	q2	OK	7.5431	1.7065	-2.14412	-2.5473	0.0012	0.0885359	no
XLOC_009647	XLOC_009647	H2-D1	17:35263093-35282104	q1	q2	OK	67.8248	24.446	-1.47221	-2.26754	0.0012	0.0885359	no
XLOC_001948	XLOC_001948	Ptprr	10:116018362-116274929	q1	q2	OK	18.5409	6.70082	-1.4683	-2.32565	0.0012	0.0885359	no
XLOC_010987	XLOC_010987	Pcdh1	18:38196693-38209762	q1	q2	OK	12.9616	30.6275	1.24058	2.31459	0.0012	0.0885359	no
XLOC_023118	XLOC_023118	Lzts1	8:69135502-69140953	q1	q2	OK	9.08498	28.1442	1.63128	2.59524	0.0012	0.0885359	no
XLOC_013835	XLOC_013835	Avp	2:130580676-130582541	q1	q2	OK	62.6972	3.48943	-4.16734	-3.51566	0.00125	0.0909198	no
XLOC_004937	XLOC_004937	D430019H16Rik	12:105453855-105493095	q1	q2	OK	19.3625	54.8414	1.502	2.45741	0.00125	0.0909198	no
XLOC_001663	XLOC_001663	Egr2	10:67537868-67542188	q1	q2	OK	1.22303	5.45787	2.15788	2.47797	0.00125	0.0909198	no
XLOC_014715	XLOC_014715	Gbp2	3:142620662-142638008	q1	q2	OK	6.26757	1.78387	-1.8129	-2.27281	0.0013	0.0928056	no
XLOC_014992	XLOC_014992	Hapln2	3:88021749-88027511	q1	q2	OK	22.1266	8.62941	-1.35845	-2.23318	0.0013	0.0928056	no
XLOC_022270	XLOC_022270	Dlgap2	8:14095874-14847687	q1	q2	OK	5.35996	15.6718	1.54788	2.45784	0.0013	0.0928056	no
XLOC_007131	XLOC_007131	Dnahc1	14:31260374-31323896	q1	q2	OK	0.85229	2.69414	1.66041	2.46906	0.0013	0.0928056	no
XLOC_003503	XLOC_003503	Rab37	11:115091430-115162240	q1	q2	OK	10.2547	1.71213	-2.58243	-2.86233	0.00135	0.0937703	no
XLOC_002079	XLOC_002079	Cnksr3	10:7119061-7212237	q1	q2	OK	7.8801	2.35656	-1.74153	-2.37383	0.00135	0.0937703	no
XLOC_003822	XLOC_003822	Slc22a4	11:53983125-54028090	q1	q2	OK	14.5203	5.15302	-1.49458	-2.23243	0.00135	0.0937703	no
XLOC_007995	XLOC_007995	Pdzd2	15:12357053-12592556	q1	q2	OK	3.66022	8.35273	1.19032	2.205	0.00135	0.0937703	no
XLOC_010870	XLOC_010870	Neto1	18:86394951-86501897	q1	q2	OK	10.6771	27.0611	1.34171	2.36373	0.00135	0.0937703	no
XLOC_019729	XLOC_019729	Ccnd2	6:127116352-127212419	q1	q2	OK	7.09291	19.3737	1.44965	2.33875	0.00135	0.0937703	no
XLOC_013680	XLOC_013680	Ano3	2:110658139-110950244	q1	q2	OK	12.7575	29.0639	1.18788	2.19701	0.0014	0.0968072	no
XLOC_022505	XLOC_022505	Homer3	8:70282998-70302452	q1	q2	OK	39.179	4.29019	-3.19097	-2.86124	0.00145	0.0989336	no
XLOC_000217	XLOC_000217	Cyp27a1	1:74713573-74737890	q1	q2	OK	8.43209	1.54275	-2.45039	-2.75548	0.00145	0.0989336	no
XLOC_025383	XLOC_025383	Pcdh11x	X:120290326-120906450	q1	q2	OK	1.31163	4.13557	1.65673	2.28847	0.00145	0.0989336	no
XLOC_010644	XLOC_010644	Egr1	18:34861206-34864956	q1	q2	OK	38.6812	103.436	1.41904	2.38647	0.0015	0.101894	no
XLOC_009650	XLOC_009650	H2-Q4	17:35379616-35384674	q1	q2	OK	17.93	5.92651	-1.59712	-2.35228	0.00155	0.103468	no
XLOC_007928	XLOC_007928	Nr4a1	15:101266845-101274795	q1	q2	OK	19.5391	48.6452	1.31593	2.30486	0.00155	0.103468	no
XLOC_011116	XLOC_011116	Rnf165	18:77456109-77565136	q1	q2	OK	4.91689	12.5355	1.3502	2.35759	0.00155	0.103468	no
XLOC_019707	XLOC_019707	Cd4	6:124864692-124888209	q1	q2	OK	2.05099	7.60477	1.89058	2.41302	0.00155	0.103468	no
XLOC_004025	XLOC_004025	Aspa	11:73304987-73324634	q1	q2	OK	26.6455	10.4523	-1.35007	-2.16774	0.0016	0.105436	no
XLOC_017148	XLOC_017148	Adra2c	5:35278565-35281763	q1	q2	OK	5.76811	14.7458	1.35414	2.24498	0.0016	0.105436	no
XLOC_010706	XLOC_010706	Sh3rf2	18:42053709-42158695	q1	q2	OK	0.656569	4.20604	2.67944	2.76515	0.0016	0.105436	no
XLOC_022670	XLOC_022670	Nlrc5	8:94472762-94527272	q1	q2	OK	1.09238	0.103911	-3.39405	-3.08506	0.00165	0.107809	no
XLOC_023079	XLOC_023079	Odz3	8:48225664-48674690	q1	q2	OK	6.65597	15.469	1.21666	2.23394	0.00165	0.107809	no
XLOC_004783	XLOC_004783	Akap5	12:76324890-76334151	q1	q2	OK	8.96325	24.3288	1.44057	2.39295	0.0017	0.110608	no
XLOC_023164	XLOC_023164	Bst2	8:71534258-71537437	q1	q2	OK	19.4893	4.59523	-2.08448	-2.40964	0.00175	0.112908	no
XLOC_016163	XLOC_016163	Penk	4:4133535-4138445	q1	q2	OK	124.144	312.619	1.33238	2.28144	0.00175	0.112908	no
XLOC_017676	XLOC_017676	Uncx	5:139543897-139548179	q1	q2	OK	3.55709	0.192135	-4.21051	-3.46187	0.0018	0.113754	no
XLOC_010774	XLOC_010774	Iigp1	18:60376028-60392634	q1	q2	OK	4.28319	0.78033	-2.45653	-2.52201	0.0018	0.113754	no
XLOC_014549	XLOC_014549	Nhlh2	3:102010144-102015492	q1	q2	OK	2.29191	0.422454	-2.43968	-2.5863	0.0018	0.113754	no
XLOC_007629	XLOC_007629	Zfpm2	15:40655041-41104592	q1	q2	OK	7.68176	2.65209	-1.53431	-2.31105	0.0018	0.113754	no
XLOC_014617	XLOC_014617	Olfm3	3:114904362-115125256	q1	q2	OK	26.9573	10.8796	-1.30905	-2.25694	0.0018	0.113754	no
XLOC_009605	XLOC_009605	Tap1	17:34187555-34197225	q1	q2	OK	4.26052	1.08034	-1.97954	-2.29357	0.0019	0.118615	no
XLOC_023741	XLOC_023741	Mcam	9:44134657-44142726	q1	q2	OK	15.9348	6.32197	-1.33373	-2.18508	0.0019	0.118615	no
XLOC_008691	XLOC_008691	Mylk	16:34784949-35004701	q1	q2	OK	2.21703	5.58942	1.33407	2.15693	0.0019	0.118615	no
XLOC_014565	XLOC_014565	Ptpn22	3:103860291-103912247	q1	q2	OK	4.33827	0.13469	-5.00941	-4.23487	0.00195	0.119797	no
XLOC_005325	XLOC_005325	Ltbp2	12:84783211-84879755	q1	q2	OK	1.57289	0.121924	-3.68936	-3.31037	0.00195	0.119797	no
XLOC_018925	XLOC_018925	Slc41a3	6:90604879-90646412	q1	q2	OK	9.12674	2.84809	-1.6801	-2.24124	0.00195	0.119797	no
XLOC_015285	XLOC_015285	Ugt8a	3:125865342-125938550	q1	q2	OK	40.9122	15.9494	-1.35902	-2.32877	0.00195	0.119797	no
XLOC_024060	XLOC_024060	Cpne4	9:104569787-105034544	q1	q2	OK	11.6648	29.2606	1.3268	2.25889	0.002	0.121897	no
XLOC_015319	XLOC_015319	Bank1	3:136053362-136326046	q1	q2	OK	0.291855	2.0689	2.82554	2.67236	0.002	0.121897	no
XLOC_016106	XLOC_016106	Icmt	4:152297213-152318625	q1	q2	OK	49.6523	19.3175	-1.36195	-2.20434	0.00205	0.12348	no
XLOC_013782	XLOC_013782	Shf	2:122348891-122368918	q1	q2	OK	39.6512	15.6571	-1.34055	-2.21629	0.00205	0.12348	no
XLOC_015589	XLOC_015589	Zkscan16	4:58943627-58958355	q1	q2	OK	10.5474	25.6124	1.27996	2.27128	0.00205	0.12348	no
XLOC_007244	XLOC_007244	A930018M24Rik	14:50895433-50897479	q1	q2	OK	3.19662	0.587874	-2.44297	-2.41387	0.00215	0.128004	no
XLOC_000236	XLOC_000236	Sgpp2	1:78310345-78420286	q1	q2	OK	16.8904	6.76574	-1.31989	-2.14975	0.00215	0.128004	no
XLOC_019990	XLOC_019990	Pnmal1	7:16959794-16962320	q1	q2	OK	33.0294	75.9707	1.20169	2.19965	0.00215	0.128004	no
XLOC_003020	XLOC_003020	Per1	11:69098955-69109960	q1	q2	OK	14.9206	34.2679	1.19955	2.24513	0.0022	0.129977	no
XLOC_019515	XLOC_019515	Egr4	6:85511121-85513542	q1	q2	OK	8.18765	21.9915	1.42543	2.24463	0.0022	0.129977	no
XLOC_004318	XLOC_004318	Krt9	11:100186780-100193246	q1	q2	OK	3.58471	11.9234	1.73387	2.42793	0.00225	0.132424	no
XLOC_003497	XLOC_003497	Ttyh2	11:114675467-114720984	q1	q2	OK	26.1074	11.0134	-1.2452	-2.18051	0.0023	0.134341	no
XLOC_012369	XLOC_012369	Sp9	2:73271925-73275771	q1	q2	OK	1.74438	7.67847	2.13811	2.55737	0.0023	0.134341	no
XLOC_006153	XLOC_006153	Tfap2a	13:40715674-40733823	q1	q2	OK	1.28735	0.0852365	-3.91679	-2.7407	0.00235	0.136743	no
XLOC_011481	XLOC_011481	Scd3	19:44203287-44244016	q1	q2	OK	3.3102	0.836086	-1.9852	-2.36118	0.0024	0.138607	no
XLOC_022991	XLOC_022991	Ido1	8:24584140-24597009	q1	q2	OK	0.779407	9.05171	3.53774	3.39037	0.0024	0.138607	no
XLOC_008692	XLOC_008692	Ptplb	16:35022420-35109175	q1	q2	OK	10.638	24.149	1.18274	2.17482	0.00245	0.140442	no
XLOC_008232	XLOC_008232	Elfn2	15:78670002-78718113	q1	q2	OK	11.3399	26.0702	1.20099	2.21559	0.00245	0.140442	no
XLOC_021147	XLOC_021147	Fosb	7:19302695-19310045	q1	q2	OK	1.76551	5.60091	1.66558	2.23984	0.0025	0.142251	no
XLOC_013200	XLOC_013200	4932418E24Rik	2:26271646-26294557	q1	q2	OK	0.826026	3.2673	1.98384	2.32035	0.0025	0.142251	no
XLOC_024766	XLOC_024766	Trf	9:103208875-103230286	q1	q2	OK	335.28	130.01	-1.36674	-2.09187	0.00255	0.143507	no
XLOC_003153	XLOC_003153	Sez6	11:77930942-77979048	q1	q2	OK	42.0044	102.862	1.2921	2.18216	0.00255	0.143507	no
XLOC_005145	XLOC_005145	Sox11	12:27334267-27342718	q1	q2	OK	1.86751	4.67705	1.32449	2.12948	0.00255	0.143507	no
XLOC_006445	XLOC_006445	Marveld2	13:100595956-100616971	q1	q2	OK	2.23356	0.301639	-2.88845	-2.61625	0.00265	0.146989	no
XLOC_007222	XLOC_007222	3632451O06Rik	14:49682018-49783367	q1	q2	OK	26.9748	10.6898	-1.33538	-2.20939	0.00265	0.146989	no
XLOC_012621	XLOC_012621	Pak6	2:118663576-118698020	q1	q2	OK	13.0473	33.4101	1.35654	2.24089	0.00265	0.146989	no
XLOC_013828	XLOC_013828	Pdyn	2:129688000-129689868	q1	q2	OK	10.397	38.5566	1.8908	2.43056	0.00265	0.146989	no
XLOC_018531	XLOC_018531	Gng11	6:4003986-4008445	q1	q2	OK	39.2888	14.1271	-1.47565	-2.18415	0.0027	0.148693	no
XLOC_020184	XLOC_020184	Ppp1r14a	7:29289319-29293390	q1	q2	OK	66.7383	24.8462	-1.42549	-2.09241	0.0027	0.148693	no
XLOC_014564	XLOC_014564	Bcl2l15	3:103832695-103854618	q1	q2	OK	7.65494	0.280081	-4.77247	-2.56886	0.00275	0.150372	no
XLOC_009502	XLOC_009502	Neurl1b	17:26414964-26446349	q1	q2	OK	4.87061	12.6307	1.37475	2.17138	0.00275	0.150372	no
XLOC_020912	XLOC_020912	Pkp3	7:141078228-141090510	q1	q2	OK	1.5617	0.0683086	-4.51491	-2.99967	0.00285	0.153661	no
XLOC_007749	XLOC_007749	Cdc42ep1	15:78842646-78855529	q1	q2	OK	19.1599	8.02393	-1.25571	-2.05546	0.00285	0.153661	no
XLOC_021734	XLOC_021734	Dgat2	7:99153662-99182713	q1	q2	OK	25.3892	58.5025	1.20428	2.16266	0.00285	0.153661	no
XLOC_010093	XLOC_010093	Cacna1h	17:25370552-25433783	q1	q2	OK	6.5111	17.134	1.39589	2.29363	0.00285	0.153661	no
XLOC_010836	XLOC_010836	Myo5b	18:74442618-74771477	q1	q2	OK	4.84362	12.1353	1.32506	2.22874	0.0029	0.154734	no
XLOC_003448	XLOC_003448	Myl4	11:104550662-104587219	q1	q2	OK	7.06895	30.4391	2.10636	2.47999	0.0029	0.154734	no
XLOC_003865	XLOC_003865	Hist3h2bb-ps	11:58954047-58954512	q1	q2	OK	0.928122	0	#NAME?	#NAME?	0.0029	0.154734	no
XLOC_019035	XLOC_019035	Slc6a12	6:121346696-121365773	q1	q2	OK	2.12415	0.409778	-2.37397	-2.37223	0.00295	0.155253	no
XLOC_012564	XLOC_012564	Pax6	2:105536079-105697364	q1	q2	OK	15.4948	5.17411	-1.5824	-2.30355	0.00295	0.155253	no
XLOC_003255	XLOC_003255	2014-09-04	11:87581130-87590539	q1	q2	OK	221.361	90.9141	-1.28383	-2.21442	0.00295	0.155253	no
XLOC_008635	XLOC_008635	Rtp1	16:23429132-23433960	q1	q2	OK	0.336808	1.83983	2.44957	2.36137	0.00295	0.155253	no
XLOC_000284	XLOC_000284	3110079O15Rik	1:87470263-87475459	q1	q2	OK	0	0.946942	inf	#NAME?	0.003	0.157347	no
XLOC_003931	XLOC_003931	Shisa6	11:66211724-66526126	q1	q2	OK	13.363	5.33003	-1.32603	-2.13731	0.00305	0.159427	no
XLOC_004275	XLOC_004275	Krt12	11:99415663-99422259	q1	q2	OK	5.99185	17.3672	1.53529	2.11777	0.0032	0.166703	no
XLOC_011079	XLOC_011079	Alpk2	18:65265528-65393888	q1	q2	OK	0.701428	0.0729257	-3.2658	-2.74161	0.00325	0.167609	no
XLOC_015426	XLOC_015426	Calb1	4:15881263-15906709	q1	q2	OK	149.949	52.0062	-1.52772	-2.33589	0.00325	0.167609	no
XLOC_008079	XLOC_008079	Enpp2	15:54838897-54920146	q1	q2	OK	195.364	76.2561	-1.35724	-2.06924	0.00325	0.167609	no
XLOC_000668	XLOC_000668	Dusp10	1:184034460-184075636	q1	q2	OK	7.40508	2.45631	-1.59202	-2.16069	0.00345	0.176741	no
XLOC_015741	XLOC_015741	Rab3b	4:108879069-108972077	q1	q2	OK	12.1301	27.7775	1.19533	2.07305	0.00345	0.176741	no
XLOC_014126	XLOC_014126	Hrh3	2:180099472-180104222	q1	q2	OK	24.7989	58.6786	1.24256	2.13232	0.0035	0.178709	no
XLOC_004687	XLOC_004687	Dgkb	12:37880704-38633410	q1	q2	OK	17.5088	38.8336	1.14922	2.01798	0.00355	0.180663	no
XLOC_002790	XLOC_002790	Slit3	11:35121455-35708507	q1	q2	OK	5.15593	11.4539	1.15154	2.00637	0.0036	0.182605	no
XLOC_001612	XLOC_001612	Pkib	10:57631980-57741112	q1	q2	OK	3.96388	1.44559	-1.45526	-2.08578	0.00365	0.183332	no
XLOC_001681	XLOC_001681	Bcr	10:75060895-75184923	q1	q2	OK	20.538	45.0757	1.13406	2.05036	0.00365	0.183332	no
XLOC_014058	XLOC_014058	Kcnb1	2:167095968-167188818	q1	q2	OK	12.8468	31.2563	1.28274	2.1379	0.00365	0.183332	no
XLOC_019428	XLOC_019428	Fam13a	6:58933535-59024502	q1	q2	OK	10.6129	4.45963	-1.25082	-2.07913	0.0037	0.184641	no
XLOC_024691	XLOC_024691	Impg1	9:80313329-80465438	q1	q2	OK	0.170263	1.22067	2.84184	2.41264	0.0037	0.184641	no
XLOC_017500	XLOC_017500	Lhx5	5:120431885-120441457	q1	q2	OK	2.63249	0.386945	-2.76623	-2.52326	0.00375	0.185337	no
XLOC_002985	XLOC_002985	Pmp22	11:63131509-63159546	q1	q2	OK	29.416	12.5782	-1.22568	-2.05909	0.00375	0.185337	no
XLOC_010101	XLOC_010101	Metrn	17:25794570-25797045	q1	q2	OK	109.346	48.4443	-1.17451	-2.02458	0.00375	0.185337	no
XLOC_002777	XLOC_002777	Hba-a1	11:32268757-32284486	q1	q2	OK	86.3535	31.6769	-1.44682	-2.18289	0.0038	0.186611	no
XLOC_011229	XLOC_011229	Pygm	19:6384428-6398459	q1	q2	OK	25.9643	11.5147	-1.17305	-2.05628	0.0038	0.186611	no
XLOC_002961	XLOC_002961	Kcnj12	11:61065803-61071131	q1	q2	OK	12.9702	4.9485	-1.39013	-2.05317	0.00385	0.187278	no
XLOC_020423	XLOC_020423	Pcsk6	7:65862135-66050386	q1	q2	OK	13.1362	5.32331	-1.30315	-2.11013	0.00385	0.187278	no
XLOC_020985	XLOC_020985	Tnnt1	7:4504662-4515975	q1	q2	OK	6.65283	20.8359	1.64703	2.14743	0.00385	0.187278	no
XLOC_004134	XLOC_004134	Lhx1	11:84519378-84525534	q1	q2	OK	5.28605	0.13608	-5.27967	-4.183	0.0039	0.187931	no
XLOC_010333	XLOC_010333	E130008D07Rik	17:43146040-43158291	q1	q2	OK	0.825161	3.64325	2.14248	2.02177	0.0039	0.187931	no
XLOC_016783	XLOC_016783	Pla2g2f	4:138750532-138757598	q1	q2	OK	0.190418	1.68562	3.14604	2.62855	0.0039	0.187931	no
XLOC_008099	XLOC_008099	Mtss1	15:58941233-59082026	q1	q2	OK	24.4035	11.0779	-1.13941	-2.01757	0.00395	0.187991	no
XLOC_011230	XLOC_011230	Rasgrp2	19:6400582-6415216	q1	q2	OK	15.2243	34.541	1.18193	2.09903	0.00395	0.187991	no
XLOC_019154	XLOC_019154	Ptpro	6:137252298-137464634	q1	q2	OK	6.0393	14.0231	1.21535	2.10384	0.00395	0.187991	no
XLOC_013404	XLOC_013404	Chrna1	2:73563280-73580306	q1	q2	OK	0.226758	1.09817	2.27588	2.19737	0.00395	0.187991	no
XLOC_020673	XLOC_020673	Syt9	7:107370789-107548655	q1	q2	OK	12.453	5.26224	-1.24275	-2.08106	0.004	0.189785	no
XLOC_023531	XLOC_023531	Gpr83	9:14860253-14869499	q1	q2	OK	5.29918	16.176	1.61001	2.29538	0.00405	0.191567	no
XLOC_018553	XLOC_018553	Foxp2	6:14901348-15441977	q1	q2	OK	2.78604	6.55786	1.23501	2.0866	0.0041	0.19275	no
XLOC_004814	XLOC_004814	Sipa1l1	12:82170015-82451786	q1	q2	OK	30.1533	71.8491	1.25265	2.05321	0.0041	0.19275	no
XLOC_017911	XLOC_017911	Sorcs2	5:36017179-36398139	q1	q2	OK	8.77566	19.4789	1.15033	2.05869	0.00415	0.193918	no
XLOC_011945	XLOC_011945	Gucy2g	19:55198097-55241236	q1	q2	OK	1.18431	4.69514	1.98713	2.34612	0.00415	0.193918	no
XLOC_003216	XLOC_003216	Rasl10b	11:83410071-83421038	q1	q2	OK	69.1347	166.626	1.26913	2.11581	0.0042	0.195072	no
XLOC_019429	XLOC_019429	Gprin3	6:59352460-59426290	q1	q2	OK	2.24677	6.46045	1.52378	2.15474	0.0042	0.195072	no
XLOC_009799	XLOC_009799	Kat2b	17:53566970-53672721	q1	q2	OK	16.6842	7.26686	-1.19908	-2.01126	0.0043	0.197928	no
XLOC_021343	XLOC_021343	Arhgap33	7:30522225-30535009	q1	q2	OK	27.4477	66.2156	1.27049	2.06389	0.0043	0.197928	no
XLOC_005076	XLOC_005076	Sp8	12:118846328-118852578	q1	q2	OK	0.393647	2.16033	2.45628	2.42127	0.0043	0.197928	no
XLOC_024783	XLOC_024783	Col6a5	9:105856069-105960643	q1	q2	OK	0.17731	0.92814	2.38807	2.41172	0.00435	0.199042	no
XLOC_012610	XLOC_012610	Tmco5	2:116878690-116892500	q1	q2	OK	0.519887	5.24191	3.33382	2.83148	0.00435	0.199042	no
XLOC_001020	XLOC_001020	Per2	1:91415981-91459328	q1	q2	OK	4.1574	9.20942	1.14743	2.03014	0.0045	0.20469	no
XLOC_009155	XLOC_009155	Gm19797	16:56914343-56928064	q1	q2	OK	1.68166	17.9114	3.41292	3.00845	0.0045	0.20469	no
XLOC_013644	XLOC_013644	Prr5l	2:101714284-101838980	q1	q2	OK	7.1001	2.82076	-1.33176	-2.01794	0.00455	0.205149	no
XLOC_023359	XLOC_023359	Calb2	8:110142537-110168206	q1	q2	OK	155.061	62.7794	-1.30447	-2.08056	0.00455	0.205149	no
XLOC_003706	XLOC_003706	5730522E02Rik	11:25616845-26210576	q1	q2	OK	0.81997	4.33235	2.40151	2.324	0.00455	0.205149	no
XLOC_009511	XLOC_009511	Syngap1	17:26941451-26970645	q1	q2	OK	29.81	66.1328	1.14957	1.99538	0.0046	0.206799	no
XLOC_021535	XLOC_021535	Ptpn5	7:47077797-47133684	q1	q2	OK	48.0766	111.244	1.21032	1.99498	0.00465	0.207835	no
XLOC_008249	XLOC_008249	Kcnj4	15:79483713-79505241	q1	q2	OK	31.4254	84.1544	1.42111	2.19099	0.00465	0.207835	no
XLOC_024247	XLOC_024247	Gria4	9:4417892-4796234	q1	q2	OK	63.1176	25.8083	-1.29021	-1.90357	0.0047	0.208259	no
XLOC_009205	XLOC_009205	Robo2	16:73892305-74410912	q1	q2	OK	9.00446	18.7681	1.05957	1.96027	0.0047	0.208259	no
XLOC_013025	XLOC_013025	Zfp831	2:174643533-174710832	q1	q2	OK	1.6092	4.27464	1.40946	2.09993	0.0047	0.208259	no
XLOC_020959	XLOC_020959	Mrgprf	7:145300908-145309557	q1	q2	OK	3.88101	0.894732	-2.11691	-2.20897	0.00475	0.208675	no
XLOC_004330	XLOC_004330	Zfp385c	11:100622954-100650693	q1	q2	OK	6.06031	1.97603	-1.61679	-2.07665	0.00475	0.208675	no
XLOC_021160	XLOC_021160	Apoc1	7:19689480-19692658	q1	q2	OK	9.18331	40.2272	2.13108	2.2404	0.00475	0.208675	no
XLOC_016607	XLOC_016607	Foxo6	4:120267077-120287261	q1	q2	OK	3.63238	11.0903	1.61031	2.26462	0.0049	0.214653	no
XLOC_001923	XLOC_001923	Lin7a	10:107271830-107425143	q1	q2	OK	25.5448	11.2329	-1.1853	-2.00854	0.00495	0.216229	no
XLOC_008383	XLOC_008383	Col2a1	15:97975601-98004724	q1	q2	OK	1.00773	0.183022	-2.46101	-2.2971	0.00515	0.221206	no
XLOC_011391	XLOC_011391	Cd274	19:29367437-29388095	q1	q2	OK	2.09659	0.508566	-2.04354	-2.20316	0.0051	0.221206	no
XLOC_002779	XLOC_002779	Hba-a2	11:32296491-32297310	q1	q2	OK	61.3487	22.1526	-1.46956	-2.10801	0.00515	0.221206	no
XLOC_019732	XLOC_019732	Tspan9	6:127961399-128143578	q1	q2	OK	39.4811	16.7173	-1.23982	-2.07213	0.00515	0.221206	no
XLOC_023046	XLOC_023046	Mtus1	8:40990911-41133726	q1	q2	OK	25.485	11.0169	-1.20993	-2.03264	0.00515	0.221206	no
XLOC_018879	XLOC_018879	Add2	6:86078083-86119555	q1	q2	OK	26.708	56.251	1.07461	2.03152	0.00515	0.221206	no
XLOC_014473	XLOC_014473	Rorc	3:94372825-94398239	q1	q2	OK	3.94129	0.90059	-2.12973	-2.24117	0.00525	0.224252	no
XLOC_006991	XLOC_006991	Hs6st3	14:119138264-119869815	q1	q2	OK	4.15273	11.3824	1.45468	2.06569	0.00525	0.224252	no
XLOC_015844	XLOC_015844	Pou3f1	4:124657645-124660655	q1	q2	OK	5.244	12.798	1.28718	1.98511	0.0053	0.22514	no
XLOC_024864	XLOC_024864	AU023762	9:113496745-113587152	q1	q2	OK	0.933533	4.64285	2.31424	2.37523	0.0053	0.22514	no
XLOC_016933	XLOC_016933	Mmp23	4:155650654-155653384	q1	q2	OK	2.94793	0.351792	-3.06691	-2.54268	0.00535	0.226019	no
XLOC_012570	XLOC_012570	Kcna4	2:107290588-107298504	q1	q2	OK	3.50747	8.28956	1.24087	2.00201	0.00535	0.226019	no
XLOC_011492	XLOC_011492	Kazald1	19:45076138-45079289	q1	q2	OK	5.76453	1.40119	-2.04055	-2.21787	0.00545	0.228989	no
XLOC_025375	XLOC_025375	Klhl4	X:114474519-114560698	q1	q2	OK	10.0176	4.34658	-1.20459	-1.88765	0.00545	0.228989	no
XLOC_006343	XLOC_006343	Irx1	13:71958231-71963723	q1	q2	OK	3.01557	0.4393	-2.77915	-2.53607	0.0055	0.229216	no
XLOC_020396	XLOC_020396	Slc17a6	7:51621829-51671126	q1	q2	OK	23.224	11.0212	-1.07533	-1.97364	0.0055	0.229216	no
XLOC_022117	XLOC_022117	Stk32c	7:139103637-139242973	q1	q2	OK	43.6885	107.339	1.29685	2.14408	0.0055	0.229216	no
XLOC_024537	XLOC_024537	Chrna3	9:55011342-55026559	q1	q2	OK	1.00831	0.109606	-3.20154	-2.50302	0.00555	0.230677	no
XLOC_005676	XLOC_005676	Gm5083	13:44121166-44125179	q1	q2	OK	5.06185	0.249528	-4.34239	-3.16042	0.00565	0.23171	no
XLOC_018978	XLOC_018978	Il17re	6:113458483-113470751	q1	q2	OK	0.737829	0.103155	-2.83847	-1.83636	0.00565	0.23171	no
XLOC_018082	XLOC_018082	Sowahb	5:93041122-93045022	q1	q2	OK	6.57383	2.535	-1.37475	-2.04841	0.00565	0.23171	no
XLOC_008914	XLOC_008914	Grin2a	16:9577709-9992533	q1	q2	OK	5.02543	11.035	1.13477	1.9615	0.00565	0.23171	no
XLOC_008379	XLOC_008379	Endou	15:97711018-97731405	q1	q2	OK	1.14197	3.71282	1.70099	1.97311	0.0056	0.23171	no
XLOC_023386	XLOC_023386	Adamts18	8:113698136-113848839	q1	q2	OK	1.8636	0.445439	-2.06479	-2.18363	0.00575	0.233329	no
XLOC_022705	XLOC_022705	Car7	8:104540806-104550343	q1	q2	OK	20.0577	8.15577	-1.29826	-2.00332	0.00575	0.233329	no
XLOC_002614	XLOC_002614	Esyt1	10:128510247-128525859	q1	q2	OK	9.42115	3.94153	-1.25715	-1.94798	0.00575	0.233329	no
XLOC_002380	XLOC_002380	Klf16	10:80567120-80577296	q1	q2	OK	13.0805	28.8228	1.13979	1.93371	0.00575	0.233329	no
XLOC_024854	XLOC_024854	Tdgf1	9:110939607-110946158	q1	q2	OK	2.04673	0.235889	-3.11714	-2.54828	0.0058	0.234126	no
XLOC_014933	XLOC_014933	1110032A04Rik	3:69819537-69859896	q1	q2	OK	5.0664	1.25654	-2.0115	-2.08571	0.0058	0.234126	no
XLOC_016937	XLOC_016937	Tmem88b	4:155781590-155785874	q1	q2	OK	45.5332	21.6802	-1.07054	-1.9436	0.00585	0.235527	no
XLOC_007527	XLOC_007527	Zic5	14:122459159-122465658	q1	q2	OK	4.63952	1.29717	-1.83861	-2.08086	0.006	0.23907	no
XLOC_008925	XLOC_008925	Litaf	16:10959272-10993121	q1	q2	OK	20.3078	9.25641	-1.13351	-1.9137	0.006	0.23907	no
XLOC_009327	XLOC_009327	Prr18	17:8340405-8344113	q1	q2	OK	33.9192	15.9654	-1.08716	-1.9858	0.006	0.23907	no
XLOC_008572	XLOC_008572	Aifm3	16:17489690-17507482	q1	q2	OK	44.7327	21.9476	-1.02726	-1.92714	0.006	0.23907	no
XLOC_000496	XLOC_000496	Rgs8	1:153653036-153697665	q1	q2	OK	98.5501	32.473	-1.60161	-2.21779	0.00605	0.240441	no
XLOC_015484	XLOC_015484	LOC100861610	4:41867666-41892837	q1	q2	OK	4.269	1.79389	-1.25081	-1.94569	0.00625	0.244607	no
XLOC_006879	XLOC_006879	Kctd9	14:67716097-67742310	q1	q2	OK	11.2963	4.84156	-1.22231	-1.92032	0.00625	0.244607	no
XLOC_002244	XLOC_002244	Unc5b	10:60762594-60831581	q1	q2	OK	14.3793	6.42748	-1.16167	-1.92457	0.00625	0.244607	no
XLOC_013402	XLOC_013402	Gpr155	2:73341506-73386398	q1	q2	OK	12.7419	25.9218	1.02458	1.93652	0.0062	0.244607	no
XLOC_010500	XLOC_010500	Strn	17:78653963-78736560	q1	q2	OK	13.9554	29.8459	1.09671	2.01695	0.00625	0.244607	no
XLOC_005121	XLOC_005121	Kcnf1	12:17172099-17176888	q1	q2	OK	16.0376	38.5954	1.26697	2.00103	0.0062	0.244607	no
XLOC_018955	XLOC_018955	Cntn6	6:104493043-104863406	q1	q2	OK	10.0894	4.35941	-1.21064	-1.9666	0.0063	0.245318	no
XLOC_023083	XLOC_023083	Wdr17	8:54629612-54724368	q1	q2	OK	6.53283	13.9218	1.09157	1.84821	0.0063	0.245318	no
XLOC_000377	XLOC_000377	Tfcp2l1	1:118627944-118685168	q1	q2	OK	0.555858	1.63508	1.55657	2.07227	0.00635	0.246642	no
XLOC_014175	XLOC_014175	Car2	3:14886425-14900770	q1	q2	OK	156.481	74.1646	-1.07718	-1.9373	0.0064	0.247338	no
XLOC_005659	XLOC_005659	Gcnt2	13:40859767-40960892	q1	q2	OK	5.15768	12.0586	1.22527	1.98888	0.0064	0.247338	no
XLOC_003234	XLOC_003234	Car4	11:84957753-84966054	q1	q2	OK	51.2564	23.3828	-1.13229	-1.93122	0.0065	0.250575	no
XLOC_006778	XLOC_006778	Rem2	14:54476099-54480434	q1	q2	OK	4.81556	11.9912	1.31621	1.95302	0.00655	0.251873	no
XLOC_015378	XLOC_015378	Lhx8	3:154306292-154330560	q1	q2	OK	0.50902	3.72632	2.87196	2.55727	0.0066	0.253164	no
XLOC_016481	XLOC_016481	Kank4	4:98754891-98817537	q1	q2	OK	3.20628	1.15221	-1.4765	-1.91315	0.00665	0.253819	no
XLOC_023316	XLOC_023316	Tppp3	8:105467491-105471422	q1	q2	OK	83.8188	38.7092	-1.1146	-1.98355	0.00665	0.253819	no
XLOC_021811	XLOC_021811	Hbb-b1	7:103812527-103813923	q1	q2	OK	30.7749	10.8137	-1.50889	-1.95155	0.00675	0.25511	no
XLOC_002516	XLOC_002516	Nav3	10:109683438-110000219	q1	q2	OK	4.79439	10.3004	1.10328	1.97659	0.00675	0.25511	no
XLOC_008015	XLOC_008015	Ankrd33b	15:31291478-31367759	q1	q2	OK	6.35766	13.7081	1.10846	1.82556	0.00675	0.25511	no
XLOC_025365	XLOC_025365	Pou3f4	X:110814464-110815550	q1	q2	OK	1.62214	6.57933	2.02004	2.11002	0.00675	0.25511	no
XLOC_011821	XLOC_011821	Asah2	19:31984645-32103140	q1	q2	OK	5.94035	2.46337	-1.26991	-1.92496	0.0068	0.255746	no
XLOC_011047	XLOC_011047	Synpo	18:60593989-60624305	q1	q2	OK	22.2365	52.6825	1.24439	1.96756	0.0068	0.255746	no
XLOC_010214	XLOC_010214	Psmb9	17:34182098-34187330	q1	q2	OK	7.27063	1.79852	-2.01527	-1.94394	0.00685	0.257	no
XLOC_000682	XLOC_000682	Esrrg	1:187609005-188214884	q1	q2	OK	15.5585	6.8876	-1.17563	-1.94672	0.0069	0.257622	no
XLOC_019223	XLOC_019223	Dlx6as1	6:6820545-6869533	q1	q2	OK	1.91688	6.56537	1.77612	1.91258	0.0069	0.257622	no
XLOC_018815	XLOC_018815	Cd8a	6:71373426-71379171	q1	q2	OK	0.699291	0.054112	-3.69187	-2.19539	0.007	0.260725	no
XLOC_005670	XLOC_005670	Phactr1	13:42680622-43138526	q1	q2	OK	58.7292	134.057	1.1907	1.88115	0.0071	0.263812	no
XLOC_014408	XLOC_014408	Kcnn3	3:89520163-89672494	q1	q2	OK	2.4029	5.4215	1.17392	1.97648	0.0072	0.266885	no
XLOC_002191	XLOC_002191	Gpr6	10:41070492-41071584	q1	q2	OK	3.24039	14.5441	2.16619	2.26798	0.0073	0.269942	no
XLOC_006954	XLOC_006954	Lmo7	14:101729927-101934693	q1	q2	OK	9.55552	21.7954	1.18962	1.98365	0.0074	0.272986	no
XLOC_005287	XLOC_005287	Tmem229b	12:78961794-79007277	q1	q2	OK	21.5762	9.84212	-1.1324	-1.86969	0.00745	0.273521	no
XLOC_007895	XLOC_007895	Tuba1c	15:99029890-99038110	q1	q2	OK	0.24181	8.87007	5.197	3.71023	0.00745	0.273521	no
XLOC_023089	XLOC_023089	Galnt7	8:57523824-57663430	q1	q2	OK	6.58006	2.77631	-1.24493	-1.86806	0.0075	0.274703	no
XLOC_010384	XLOC_010384	Mdfi	17:47815331-47834691	q1	q2	OK	4.20779	0.222975	-4.23811	-2.95048	0.0076	0.276908	no
XLOC_014264	XLOC_014264	Lhfp	3:53041546-53261679	q1	q2	OK	26.8234	12.4414	-1.10835	-1.87046	0.00765	0.276908	no
XLOC_026068	XLOC_026068	Dcx	X:143855841-143933219	q1	q2	OK	3.72188	8.04577	1.1122	1.88766	0.00765	0.276908	no
XLOC_005873	XLOC_005873	Homer1	13:93304494-93404962	q1	q2	OK	15.4129	33.8098	1.1333	1.89305	0.0076	0.276908	no
XLOC_004696	XLOC_004696	Foxg1	12:49382882-49386867	q1	q2	OK	15.7503	39.5309	1.3276	1.96233	0.00765	0.276908	no
XLOC_017464	XLOC_017464	Oasl2	5:114896933-114912245	q1	q2	OK	4.24316	1.09101	-1.95947	-2.19092	0.0077	0.278066	no
XLOC_013043	XLOC_013043	Gm14322	2:177759287-177773275	q1	q2	OK	6.49631	2.63543	-1.30158	-1.98404	0.00775	0.278566	no
XLOC_003541	XLOC_003541	Mgat5b	11:116918862-116986944	q1	q2	OK	17.6851	36.1527	1.03157	1.92728	0.00775	0.278566	no
XLOC_007243	XLOC_007243	Klhl33	14:50891388-50893255	q1	q2	OK	5.95194	1.16207	-2.35667	-2.2462	0.0078	0.279712	no
XLOC_015236	XLOC_015236	Fam102b	3:108970996-109027607	q1	q2	OK	10.1586	19.8815	0.968728	1.83137	0.00785	0.280852	no
XLOC_019309	XLOC_019309	Dgki	6:36846021-37299976	q1	q2	OK	6.03989	12.3249	1.02898	1.85301	0.0079	0.281986	no
XLOC_006397	XLOC_006397	Thbs4	13:92751585-92794818	q1	q2	OK	2.0356	0.511732	-1.992	-2.00391	0.00795	0.282463	no
XLOC_008775	XLOC_008775	Abi3bp	16:56477845-56690135	q1	q2	OK	2.45967	6.28207	1.35277	1.87985	0.00795	0.282463	no
XLOC_017474	XLOC_017474	Pxn	5:115506701-115555986	q1	q2	OK	15.6832	7.2494	-1.11328	-1.88634	0.00805	0.284704	no
XLOC_003695	XLOC_003695	B3gnt2	11:22834738-22860336	q1	q2	OK	9.56326	20.3693	1.09082	1.93613	0.00805	0.284704	no
XLOC_004270	XLOC_004270	Krt25	11:99315843-99322941	q1	q2	OK	2.04923	0.17035	-3.5885	-2.58572	0.00815	0.28562	no
XLOC_007490	XLOC_007490	Tbc1d4	14:101442359-101609191	q1	q2	OK	6.34436	2.7699	-1.19564	-1.8653	0.00815	0.28562	no
XLOC_012305	XLOC_012305	Rif1	2:52072836-52122381	q1	q2	OK	9.69684	4.43121	-1.12981	-1.91268	0.00815	0.28562	no
XLOC_014906	XLOC_014906	Gpr149	3:62529962-62605140	q1	q2	OK	0.880925	2.76452	1.64994	1.90639	0.0081	0.28562	no
XLOC_022425	XLOC_022425	Enpp6	8:46986924-47094895	q1	q2	OK	5.97566	2.28127	-1.38926	-1.89988	0.00825	0.287167	no
XLOC_000120	XLOC_000120	Stat1	1:52119437-52161865	q1	q2	OK	10.0679	4.79296	-1.07077	-1.8882	0.00825	0.287167	no
XLOC_019473	XLOC_019473	Dnahc6	6:73012042-73221631	q1	q2	OK	0.55809	1.47781	1.40489	1.95339	0.00825	0.287167	no
XLOC_020901	XLOC_020901	Cyp2e1	7:140763831-140774981	q1	q2	OK	2.75304	0.420825	-2.70973	-2.30717	0.0083	0.288257	no
XLOC_005313	XLOC_005313	Dpf3	12:83269197-83487708	q1	q2	OK	6.30018	1.2956	-2.28177	-2.11292	0.00835	0.288693	no
XLOC_021956	XLOC_021956	Calca	7:114631477-114636357	q1	q2	OK	5.46255	1.1699	-2.22319	-2.09048	0.00835	0.288693	no
XLOC_022152	XLOC_022152	Irf7	7:141263182-141266424	q1	q2	OK	3.80583	0.900266	-2.07979	-1.99118	0.0084	0.289772	no
XLOC_009767	XLOC_009767	Trerf1	17:47140941-47359458	q1	q2	OK	4.43094	10.1572	1.19682	1.9435	0.00845	0.290846	no
XLOC_015879	XLOC_015879	Trim62	4:128884139-128911326	q1	q2	OK	28.0977	12.9038	-1.12266	-1.87394	0.0085	0.291915	no
XLOC_016584	XLOC_016584	Tmem125	4:118540940-118543726	q1	q2	OK	10.3164	4.00396	-1.36544	-1.9122	0.00855	0.29233	no
XLOC_016913	XLOC_016913	BC039966	4:153948454-153950476	q1	q2	OK	2.09028	13.1261	2.65067	2.39044	0.00855	0.29233	no
XLOC_012423	XLOC_012423	Aplnr	2:85136359-85139923	q1	q2	OK	0.801787	0.112184	-2.83735	-2.1218	0.0086	0.292742	no
XLOC_014713	XLOC_014713	Gbp3	3:142560051-142573212	q1	q2	OK	5.51309	2.02105	-1.44776	-1.82963	0.0086	0.292742	no
XLOC_000879	XLOC_000879	Als2,Mpp4	1:59120934-59237231	q1	q2	OK	22.1881	10.1311	-1.131	-1.85534	0.00865	0.292913	no
XLOC_017254	XLOC_017254	Kit	5:75574986-75656722	q1	q2	OK	23.1471	10.7406	-1.10775	-1.87811	0.0087	0.292913	no
XLOC_002676	XLOC_002676	Selm	11:3514701-3517351	q1	q2	OK	150.518	75.6676	-0.992188	-1.82308	0.0087	0.292913	no
XLOC_001408	XLOC_001408	Kcnk2	1:189207929-189344897	q1	q2	OK	13.2869	27.8918	1.06984	1.83288	0.0087	0.292913	no
XLOC_006088	XLOC_006088	Scgn	13:23953455-23991214	q1	q2	OK	0.535215	2.83942	2.4074	2.04452	0.0087	0.292913	no
XLOC_018315	XLOC_018315	Rimbp2	5:128760400-128953362	q1	q2	OK	11.1588	24.1862	1.11601	1.90466	0.00875	0.293954	no
XLOC_016697	XLOC_016697	Epb4.1	4:131923412-132075313	q1	q2	OK	21.7257	9.93581	-1.12869	-1.87119	0.0088	0.294351	no
XLOC_014670	XLOC_014670	Agxt2l1	3:130617447-130635750	q1	q2	OK	15.8354	7.36485	-1.10443	-1.86495	0.0088	0.294351	no
XLOC_014305	XLOC_014305	Mme	3:63295871-63382231	q1	q2	OK	1.81602	4.6684	1.36215	1.93634	0.0089	0.29641	no
XLOC_018766	XLOC_018766	Ccdc129	6:55837017-55978598	q1	q2	OK	0.257919	1.95871	2.92492	2.44316	0.0089	0.29641	no
XLOC_005594	XLOC_005594	Fam65b	13:24614609-24733806	q1	q2	OK	10.3418	21.7803	1.07454	1.81691	0.00895	0.297433	no
XLOC_000151	XLOC_000151	Fzd7	1:59482146-59486955	q1	q2	OK	6.62439	2.79752	-1.24364	-1.88708	0.009	0.297811	no
XLOC_003870	XLOC_003870	Gjc2	11:59175563-59183213	q1	q2	OK	19.437	8.62098	-1.17288	-1.88933	0.009	0.297811	no
XLOC_018134	XLOC_018134	Gbp4	5:105115766-105139586	q1	q2	OK	1.63365	0.429401	-1.92771	-1.98787	0.00905	0.298186	no
XLOC_007608	XLOC_007608	Kcns2	15:34837380-34842337	q1	q2	OK	4.12652	8.79985	1.09255	1.80947	0.00905	0.298186	no
XLOC_011415	XLOC_011415	Ifit3	19:34583528-34588982	q1	q2	OK	8.75398	3.25832	-1.42581	-1.90899	0.0091	0.299194	no
XLOC_017355	XLOC_017355	Fras1	5:96373954-96784728	q1	q2	OK	1.80416	3.85845	1.0967	1.84642	0.0092	0.301838	no
XLOC_010138	XLOC_010138	Fkbp5	17:28399094-28441056	q1	q2	OK	8.32444	17.1448	1.04235	1.8389	0.00925	0.302834	no
XLOC_001355	XLOC_001355	Pld5	1:175962305-176275312	q1	q2	OK	8.36905	3.44039	-1.28249	-1.89441	0.0093	0.303184	no
XLOC_010797	XLOC_010797	St8sia3	18:64157723-64277180	q1	q2	OK	21.5686	42.2178	0.968917	1.76532	0.0093	0.303184	no
XLOC_024685	XLOC_024685	Gm10635	9:79444036-79519302	q1	q2	OK	0.295386	1.18192	2.00045	1.94566	0.00935	0.304171	no
XLOC_008636	XLOC_008636	Rtp4	16:23609918-23614222	q1	q2	OK	3.47994	0.897398	-1.95524	-1.89605	0.0094	0.305154	no
XLOC_020528	XLOC_020528	Odz4	7:96210636-96908554	q1	q2	OK	6.12109	11.9133	0.960718	1.81256	0.0095	0.307107	no
XLOC_022388	XLOC_022388	Gm19410	8:35767633-35799398	q1	q2	OK	1.44764	4.86108	1.74758	2.02865	0.0095	0.307107	no
XLOC_000803	XLOC_000803	2010300C02Rik	1:37608578-37719811	q1	q2	OK	36.2751	83.3292	1.19984	1.86143	0.0097	0.312263	no
XLOC_013379	XLOC_013379	Scn7a	2:66673425-66784910	q1	q2	OK	0.5298	1.42778	1.43025	1.78192	0.0097	0.312263	no
XLOC_000573	XLOC_000573	Apoa2	1:171225053-171226379	q1	q2	OK	9.06678	1.64799	-2.45988	-2.01288	0.0099	0.317376	no
XLOC_000639	XLOC_000639	Kif26b	1:178529124-178932857	q1	q2	OK	3.87937	1.6405	-1.24168	-1.83146	0.0099	0.317376	no
XLOC_009852	XLOC_009852	A330050F15Rik	17:69439325-69489233	q1	q2	OK	8.96197	3.51678	-1.34956	-1.8467	0.00995	0.317658	no
XLOC_014003	XLOC_014003	Ptprt	2:161527622-162661147	q1	q2	OK	8.37619	16.688	0.994444	1.84983	0.00995	0.317658	no
XLOC_003813	XLOC_003813	Sowaha	11:53476577-53480195	q1	q2	OK	20.5532	41.7712	1.02315	1.86806	0.01005	0.319528	no
XLOC_018307	XLOC_018307	Scarb1	5:125277086-125341094	q1	q2	OK	9.05302	19.2844	1.09096	1.84976	0.01005	0.319528	no
XLOC_018274	XLOC_018274	Ccdc63	5:122108055-122138062	q1	q2	OK	1.28784	0.182777	-2.8168	-2.19078	0.01035	0.328389	no
XLOC_007427	XLOC_007427	Pdlim2	14:70164217-70177672	q1	q2	OK	20.253	9.06815	-1.15926	-1.82453	0.0105	0.331783	no
XLOC_010560	XLOC_010560	9430020K01Rik	18:4634928-4682869	q1	q2	OK	14.921	28.99	0.958214	1.80274	0.0105	0.331783	no
XLOC_013293	XLOC_013293	Traf1	2:34943257-34961772	q1	q2	OK	2.27171	0.449305	-2.33801	-2.12122	0.01065	0.332435	no
XLOC_018718	XLOC_018718	Gimap4	6:48684577-48692062	q1	q2	OK	1.70396	0.424911	-2.00366	-1.48343	0.01065	0.332435	no
XLOC_022808	XLOC_022808	Cdh13	8:118283754-119323448	q1	q2	OK	16.6387	33.4787	1.0087	1.81876	0.01065	0.332435	no
XLOC_009300	XLOC_009300	Tiam2	17:3326572-3557713	q1	q2	OK	5.98769	13.4503	1.16757	1.92694	0.0106	0.332435	no
XLOC_007785	XLOC_007785	Mchr1	15:81235498-81238964	q1	q2	OK	5.51222	13.4984	1.29208	1.9162	0.0106	0.332435	no
XLOC_019090	XLOC_019090	Ano2	6:125690418-126040133	q1	q2	OK	1.79252	4.82438	1.42835	1.91694	0.0106	0.332435	no
XLOC_011716	XLOC_011716	Cd6	19:10789338-10830058	q1	q2	OK	0.494154	3.15068	2.67263	2.21252	0.0107	0.333321	no
XLOC_009652	XLOC_009652	H2-Q6	17:35424876-35428361	q1	q2	OK	3.87543	0.286782	-3.75633	-2.74255	0.01075	0.333531	no
XLOC_016224	XLOC_016224	Mob3b	4:34949073-35157484	q1	q2	OK	3.12279	1.21936	-1.35671	-1.86324	0.01075	0.333531	no
XLOC_017144	XLOC_017144	Rgs12	5:34949447-35033595	q1	q2	OK	10.6439	22.3002	1.06703	1.85349	0.0108	0.33441	no
XLOC_016692	XLOC_016692	Serinc2	4:130253496-130275586	q1	q2	OK	7.02229	2.29238	-1.6151	-1.85825	0.01085	0.334614	no
XLOC_020376	XLOC_020376	Kcnc1	7:46396467-46438704	q1	q2	OK	75.1385	33.3577	-1.17153	-1.79472	0.01085	0.334614	no
XLOC_020185	XLOC_020185	Dpf1	7:29304004-29317586	q1	q2	OK	14.4844	29.3974	1.02119	1.78519	0.01095	0.336353	no
XLOC_011102	XLOC_011102	Dcc	18:71253631-72351069	q1	q2	OK	2.11336	4.35442	1.04294	1.79096	0.01095	0.336353	no
XLOC_008539	XLOC_008539	Mkl2	16:13256480-13417529	q1	q2	OK	19.1286	39.6923	1.05313	1.65227	0.01105	0.33875	no
XLOC_023573	XLOC_023573	Icam5	9:21032037-21039036	q1	q2	OK	39.9743	93.9476	1.23278	1.856	0.01115	0.339789	no
XLOC_006913	XLOC_006913	Htr2a	14:74640839-74706859	q1	q2	OK	2.20357	5.94479	1.43178	1.91651	0.01115	0.339789	no
XLOC_008129	XLOC_008129	Col22a1	15:71798475-72034227	q1	q2	OK	0.420204	1.45538	1.79224	1.97719	0.01115	0.339789	no
XLOC_011187	XLOC_011187	Rin1	19:5050807-5057071	q1	q2	OK	8.40841	18.4797	1.13604	1.79874	0.0112	0.340639	no
XLOC_005820	XLOC_005820	Irx2	13:72628977-72634194	q1	q2	OK	5.68732	0.112071	-5.66527	-4.25268	0.01135	0.343845	no
XLOC_018063	XLOC_018063	Rassf6	5:90603075-90640487	q1	q2	OK	1.55205	0.290746	-2.41635	-2.0198	0.01135	0.343845	no
XLOC_003440	XLOC_003440	Rprml	11:103649508-103650580	q1	q2	OK	23.0956	54.8861	1.24882	1.90075	0.0114	0.344682	no
XLOC_023374	XLOC_023374	Fa2h	8:111345137-111393821	q1	q2	OK	36.1928	17.7158	-1.03067	-1.80797	0.01145	0.344842	no
XLOC_019833	XLOC_019833	Lmo3	6:138364480-138581968	q1	q2	OK	24.7122	56.8144	1.20104	1.91928	0.01145	0.344842	no
XLOC_006658	XLOC_006658	Galntl2	14:32029102-32058326	q1	q2	OK	4.02467	1.3424	-1.58406	-1.75174	0.0115	0.345	no
XLOC_004617	XLOC_004617	Hpcal1	12:17690813-17791926	q1	q2	OK	105.407	53.3142	-0.983375	-1.77573	0.0115	0.345	no
XLOC_017143	XLOC_017143	A930005I04Rik	5:34915914-34923839	q1	q2	OK	0.731193	2.51588	1.78274	1.93478	0.01155	0.345827	no
XLOC_020169	XLOC_020169	Fbxo27	7:28692848-28699338	q1	q2	OK	8.36712	3.36483	-1.3142	-1.81385	0.0118	0.351946	no
XLOC_016304	XLOC_016304	Shb	4:45423275-45530828	q1	q2	OK	4.57356	10.0924	1.14188	1.7877	0.0118	0.351946	no
XLOC_012620	XLOC_012620	Bub1b	2:118598210-118641592	q1	q2	OK	0.961512	0.241519	-1.99317	-1.88272	0.01185	0.352755	no
XLOC_000653	XLOC_000653	Tmem63a	1:180942517-180975104	q1	q2	OK	19.6715	9.64643	-1.02804	-1.82986	0.01195	0.355046	no
XLOC_012321	XLOC_012321	Tanc1	2:59612043-59846149	q1	q2	OK	10.7439	5.33341	-1.01039	-1.8121	0.01205	0.356643	no
XLOC_001133	XLOC_001133	Ppp1r12b	1:134765942-134955940	q1	q2	OK	10.2568	20.2519	0.981476	1.77522	0.01205	0.356643	no
XLOC_019406	XLOC_019406	Pde1c	6:56069803-56369634	q1	q2	OK	8.10912	3.33307	-1.28269	-1.77387	0.0121	0.357437	no
XLOC_002448	XLOC_002448	4930547N16Rik	10:88091071-88146941	q1	q2	OK	1.86946	0.272767	-2.77688	-2.02572	0.0122	0.359015	no
XLOC_015262	XLOC_015262	D3Bwg0562e	3:117319144-117360876	q1	q2	OK	30.1311	63.7731	1.0817	1.80201	0.0122	0.359015	no
XLOC_017452	XLOC_017452	Dao	5:114003825-114025460	q1	q2	OK	13.3641	0.134729	-6.63215	-5.14043	0.0123	0.359216	no
XLOC_007818	XLOC_007818	Pnpla3	15:84167815-84189521	q1	q2	OK	5.27337	2.42563	-1.12037	-1.73658	0.0123	0.359216	no
XLOC_010294	XLOC_010294	Mog	17:37010739-37023398	q1	q2	OK	89.5479	45.4863	-0.977227	-1.75829	0.0123	0.359216	no
XLOC_004607	XLOC_004607	Fam49a	12:12262138-12392475	q1	q2	OK	31.8461	64.3016	1.01374	1.75222	0.01225	0.359216	no
XLOC_025278	XLOC_025278	Arx	X:93286645-93298357	q1	q2	OK	3.52743	9.68536	1.45719	1.99	0.0124	0.361452	no
XLOC_005164	XLOC_005164	Prkar2b	12:31958478-32061279	q1	q2	OK	16.2768	32.7484	1.00861	1.83111	0.01245	0.362225	no
XLOC_014736	XLOC_014736	Uox	3:146581372-146631483	q1	q2	OK	0.419782	2.38541	2.50653	2.0746	0.01255	0.364446	no
XLOC_001859	XLOC_001859	Pmch	10:88091071-88146941	q1	q2	OK	15.2235	0.934112	-4.02657	-2.57406	0.01285	0.371809	no
XLOC_021515	XLOC_021515	Kcnj14	7:45816466-45824747	q1	q2	OK	1.9976	0.585815	-1.76975	-1.8236	0.0129	0.371809	no
XLOC_017635	XLOC_017635	Vgf	5:137030294-137033351	q1	q2	OK	58.5488	117.196	1.00121	1.76121	0.0129	0.371809	no
XLOC_020571	XLOC_020571	Pde2a	7:101421690-101512829	q1	q2	OK	65.5507	178.276	1.44343	1.94941	0.0129	0.371809	no
XLOC_006785	XLOC_006785	Cmtm5	14:54936469-54939277	q1	q2	OK	100.741	51.4411	-0.969657	-1.73774	0.013	0.373993	no
XLOC_003091	XLOC_003091	P2rx5	11:73160529-73172687	q1	q2	OK	2.1223	0.467168	-2.18361	-2.00177	0.0131	0.374772	no
XLOC_004856	XLOC_004856	Esrrb	12:86361116-86521628	q1	q2	OK	2.53007	0.803012	-1.65568	-1.95049	0.0131	0.374772	no
XLOC_025583	XLOC_025583	2010204K13Rik	X:7411816-7422988	q1	q2	OK	21.6208	55.5129	1.3604	1.82935	0.0131	0.374772	no
XLOC_009745	XLOC_009745	Nfkbie	17:45555715-45563169	q1	q2	OK	3.17634	1.03388	-1.61929	-1.78397	0.01315	0.374851	no
XLOC_005369	XLOC_005369	Kcnk10	12:98433993-98577940	q1	q2	OK	4.66429	1.70467	-1.45217	-1.78639	0.0132	0.374851	no
XLOC_017920	XLOC_017920	Wfs1	5:36966103-36988982	q1	q2	OK	31.5278	62.0421	0.976623	1.73953	0.0132	0.374851	no
XLOC_001371	XLOC_001371	6330403A02Rik	1:180432372-180483504	q1	q2	OK	29.0924	68.6585	1.2388	1.79277	0.0132	0.374851	no
XLOC_022812	XLOC_022812	Necab2	8:119446718-119472635	q1	q2	OK	32.3896	64.8151	1.0008	1.77221	0.0133	0.376305	no
XLOC_006113	XLOC_006113	Sox4	13:28950715-28953682	q1	q2	OK	3.83164	8.81081	1.20131	1.82441	0.0133	0.376305	no
XLOC_014929	XLOC_014929	Trim59	3:69035293-69044742	q1	q2	OK	12.6817	6.005	-1.07851	-1.77917	0.0134	0.37844	no
XLOC_013158	XLOC_013158	Cacna1b	2:24606374-24763152	q1	q2	OK	9.65323	18.6459	0.949775	1.74348	0.01345	0.378465	no
XLOC_018059	XLOC_018059	Adamts3	5:89673840-89883334	q1	q2	OK	4.05151	7.90975	0.965172	1.73348	0.01345	0.378465	no
XLOC_018857	XLOC_018857	Slc4a5	6:83237374-83304945	q1	q2	OK	1.81768	0.468855	-1.95489	-1.98	0.01355	0.380585	no
XLOC_023955	XLOC_023955	Bmp5	9:75775364-75899017	q1	q2	OK	3.00381	0.817659	-1.87722	-1.89119	0.0136	0.380603	no
XLOC_002430	XLOC_002430	Appl2	10:83600032-83648664	q1	q2	OK	63.4647	32.3468	-0.972334	-1.75103	0.0136	0.380603	no
XLOC_007906	XLOC_007906	Aqp6	15:99601399-99605477	q1	q2	OK	5.10498	1.59761	-1.67599	-1.81549	0.01365	0.38131	no
XLOC_023896	XLOC_023896	Gm514	9:65361059-65380377	q1	q2	OK	4.83996	1.43082	-1.75816	-1.86814	0.0138	0.383416	no
XLOC_021259	XLOC_021259	Erf	7:25242559-25250758	q1	q2	OK	9.31376	18.5718	0.995678	1.73616	0.0138	0.383416	no
XLOC_010169	XLOC_010169	Sik1	17:31844249-31855792	q1	q2	OK	3.31876	6.95132	1.06664	1.70491	0.0138	0.383416	no
XLOC_005104	XLOC_005104	Kcns3	12:11090201-11150842	q1	q2	OK	3.18852	1.13344	-1.49218	-1.80534	0.01395	0.386192	no
XLOC_015963	XLOC_015963	Htr1d	4:136423523-136444402	q1	q2	OK	1.03552	2.88705	1.47924	1.73461	0.01395	0.386192	no
XLOC_002277	XLOC_002277	Zfp365	10:67886104-67912662	q1	q2	OK	67.5856	152.754	1.17642	1.77395	0.014	0.386882	no
XLOC_017575	XLOC_017575	Gpr133	5:129096749-129204599	q1	q2	OK	0.49284	1.57477	1.67595	1.85783	0.01405	0.387569	no
XLOC_021623	XLOC_021623	AU020206	7:75769038-75782099	q1	q2	OK	3.74931	0.810179	-2.21031	-1.96704	0.01425	0.390293	no
XLOC_003052	XLOC_003052	Slc16a11	11:70213909-70216414	q1	q2	OK	17.6236	8.47927	-1.0555	-1.68092	0.0142	0.390293	no
XLOC_023792	XLOC_023792	Cryab	9:50752757-50756633	q1	q2	OK	114.894	61.921	-0.891801	-1.689	0.01425	0.390293	no
XLOC_011249	XLOC_011249	Chrm1	19:8664004-8683606	q1	q2	OK	14.7359	35.1051	1.25235	1.83402	0.0142	0.390293	no
XLOC_020510	XLOC_020510	Grm5	7:87584167-88135063	q1	q2	OK	15.8944	33.7805	1.08768	1.73022	0.01435	0.392335	no
XLOC_010907	XLOC_010907	Aqp4	18:15389393-15403684	q1	q2	OK	86.3364	37.9854	-1.18452	-1.82202	0.0145	0.394339	no
XLOC_024725	XLOC_024725	1190002N15Rik	9:94517863-94538081	q1	q2	OK	20.8526	10.6218	-0.973203	-1.7213	0.0145	0.394339	no
XLOC_001620	XLOC_001620	Sh3rf3	10:58813358-59138916	q1	q2	OK	2.7538	6.20299	1.17154	1.83668	0.0145	0.394339	no
XLOC_002910	XLOC_002910	Irgm2	11:58214976-58222783	q1	q2	OK	4.07071	1.56098	-1.38283	-1.7727	0.0146	0.394968	no
XLOC_023758	XLOC_023758	Scn4b	9:45139041-45154061	q1	q2	OK	61.0289	122.396	1.00399	1.73755	0.0146	0.394968	no
XLOC_006497	XLOC_006497	Isl1	13:116298269-116309688	q1	q2	OK	1.21559	3.91287	1.68657	1.86165	0.0146	0.394968	no
XLOC_023528	XLOC_023528	Sesn3	9:14276300-14326134	q1	q2	OK	16.9964	33.7316	0.988871	1.77744	0.01485	0.398932	no
XLOC_020999	XLOC_020999	Shisa7	7:4825551-4844696	q1	q2	OK	16.455	33.9349	1.04425	1.70322	0.0148	0.398932	no
XLOC_015874	XLOC_015874	Dlgap3	4:127169270-127237022	q1	q2	OK	58.9564	121.937	1.04842	1.72904	0.0148	0.398932	no
XLOC_021575	XLOC_021575	B230209E15Rik	7:61529409-61615327	q1	q2	OK	10.9555	23.6851	1.11232	1.82169	0.01485	0.398932	no
XLOC_008295	XLOC_008295	Tcf20	15:82808621-82912134	q1	q2	OK	11.7687	21.9983	0.902441	1.69979	0.0149	0.399579	no
XLOC_003173	XLOC_003173	Sebox	11:78503512-78505081	q1	q2	OK	3.40545	0.717696	-2.2464	-2.02357	0.015	0.400173	no
XLOC_016735	XLOC_016735	Cd52	4:134093537-134095073	q1	q2	OK	12.3966	3.49443	-1.82681	-1.77776	0.015	0.400173	no
XLOC_013725	XLOC_013725	Rasgrp1	2:117279992-117342877	q1	q2	OK	50.6889	109.798	1.11511	1.67603	0.015	0.400173	no
XLOC_005034	XLOC_005034	1200009I06Rik	12:111417429-111431183	q1	q2	OK	1.27311	0.349395	-1.86542	-1.79017	0.01505	0.400813	no
XLOC_019225	XLOC_019225	Dlx5	6:6877804-6882068	q1	q2	OK	1.75785	7.30492	2.05505	2.00838	0.0151	0.401452	no
XLOC_019256	XLOC_019256	Cadps2	6:23262772-23839421	q1	q2	OK	33.3929	17.1144	-0.96433	-1.72404	0.0152	0.403415	no
XLOC_014345	XLOC_014345	Fga	3:83026152-83033627	q1	q2	OK	0.785857	0.0506491	-3.95566	-2.0204	0.01525	0.404046	no
XLOC_025180	XLOC_025180	Ldoc1	X:61709615-61710950	q1	q2	OK	3.25527	0.659223	-2.30394	-2.05777	0.01545	0.407943	no
XLOC_023763	XLOC_023763	Fxyd2	9:45399708-45410278	q1	q2	OK	2.98399	12.4291	2.05841	1.9157	0.01545	0.407943	no
XLOC_014252	XLOC_014252	Pcdh10	3:45378397-45439309	q1	q2	OK	19.4413	40.7507	1.0677	1.75406	0.01555	0.409183	no
XLOC_024361	XLOC_024361	Kcnj5	9:32314782-32344237	q1	q2	OK	0.287742	1.24072	2.10833	1.99384	0.01555	0.409183	no
XLOC_014092	XLOC_014092	Pmepa1	2:173224464-173276533	q1	q2	OK	9.73804	18.8116	0.949915	1.75084	0.0156	0.409799	no
XLOC_013116	XLOC_013116	Gata3	2:9857077-9878600	q1	q2	OK	0.679869	0.0675392	-3.33146	-2.40107	0.0157	0.410329	no
XLOC_008799	XLOC_008799	Robo1	16:72663148-73046100	q1	q2	OK	5.43254	10.3748	0.933379	1.74609	0.01565	0.410329	no
XLOC_023273	XLOC_023273	Ces5a	8:93499377-93535707	q1	q2	OK	0.251713	2.49893	3.31146	2.46382	0.0157	0.410329	no
XLOC_007054	XLOC_007054	4930452B06Rik	14:8431171-8666290	q1	q2	OK	3.24037	7.57277	1.22466	1.7696	0.0159	0.414853	no
XLOC_009737	XLOC_009737	Pla2g7	17:43568450-43612201	q1	q2	OK	131.375	67.8503	-0.953266	-1.67021	0.01595	0.415454	no
XLOC_024690	XLOC_024690	Filip1	9:79815561-79977882	q1	q2	OK	2.92441	6.73207	1.2029	1.77255	0.016	0.416054	no
XLOC_003993	XLOC_003993	Cxcl16	11:70454233-70466199	q1	q2	OK	1.79918	0.442588	-2.0233	-1.8339	0.01625	0.421843	no
XLOC_003442	XLOC_003442	Wnt3	11:103774174-103818021	q1	q2	OK	3.7986	1.33714	-1.50632	-1.7861	0.0163	0.42243	no
XLOC_006199	XLOC_006199	Shc3	13:51431040-51567084	q1	q2	OK	9.8247	21.1718	1.10766	1.75529	0.01635	0.423015	no
XLOC_018199	XLOC_018199	2900026A02Rik	5:113086322-113163313	q1	q2	OK	6.54646	13.0487	0.99512	1.72392	0.01655	0.426758	no
XLOC_004771	XLOC_004771	Prkch	12:73585040-73778185	q1	q2	OK	2.08425	5.02712	1.2702	1.74841	0.01655	0.426758	no
XLOC_021721	XLOC_021721	Thrsp	7:97412956-97417510	q1	q2	OK	30.958	14.5462	-1.08967	-1.71026	0.0166	0.427332	no
XLOC_020715	XLOC_020715	Parva	7:112427705-112591688	q1	q2	OK	27.4204	14.4781	-0.921377	-1.69655	0.0167	0.427764	no
XLOC_024277	XLOC_024277	Fat3	9:15910192-16378231	q1	q2	OK	4.05784	7.7078	0.925608	1.71415	0.0167	0.427764	no
XLOC_017161	XLOC_017161	Gm1043	5:37170588-37229342	q1	q2	OK	2.13792	5.01146	1.22902	1.68417	0.0167	0.427764	no
XLOC_024449	XLOC_024449	Cbl	9:44149261-44234046	q1	q2	OK	5.17456	10.2224	0.982227	1.69974	0.01695	0.433448	no
XLOC_024435	XLOC_024435	Ubash3b	9:41013640-41157494	q1	q2	OK	17.4225	8.65184	-1.00988	-1.68655	0.01705	0.435283	no
XLOC_013063	XLOC_013063	Slco4a1	2:180460977-180474852	q1	q2	OK	2.68957	0.927296	-1.53628	-1.73158	0.01735	0.44148	no
XLOC_005928	XLOC_005928	Plk2	13:110395043-110400844	q1	q2	OK	42.3403	85.2898	1.01034	1.65132	0.01735	0.44148	no
XLOC_007216	XLOC_007216	Otx2	14:48658170-48662872	q1	q2	OK	4.04392	1.19743	-1.75581	-1.82323	0.0179	0.446368	no
XLOC_000106	XLOC_000106	1500015O10Rik	1:43730601-43742564	q1	q2	OK	14.5323	4.65746	-1.64165	-1.81159	0.0179	0.446368	no
XLOC_024791	XLOC_024791	Parp3	9:106470352-106476651	q1	q2	OK	3.09349	1.12229	-1.46279	-1.70903	0.0178	0.446368	no
XLOC_002599	XLOC_002599	Nxph4	10:127525472-127534559	q1	q2	OK	10.84	4.61737	-1.23123	-1.69349	0.01805	0.446368	no
XLOC_002542	XLOC_002542	Lyz2	10:117277540-117282272	q1	q2	OK	23.4817	10.4752	-1.16456	-1.69734	0.0177	0.446368	no
XLOC_010545	XLOC_010545	Kcnk12	17:87745820-87797994	q1	q2	OK	9.6711	4.37484	-1.14445	-1.60204	0.0181	0.446368	no
XLOC_019032	XLOC_019032	Tuba8	6:121210769-121226097	q1	q2	OK	23.062	11.21	-1.04073	-1.59815	0.01815	0.446368	no
XLOC_009118	XLOC_009118	Boc	16:44485044-44558870	q1	q2	OK	9.30035	4.5547	-1.02993	-1.65545	0.01805	0.446368	no
XLOC_005848	XLOC_005848	Arrdc3	13:80883421-80896042	q1	q2	OK	23.0595	12.0828	-0.932404	-1.68726	0.0176	0.446368	no
XLOC_025646	XLOC_025646	Klhl13	X:23219270-23365053	q1	q2	OK	18.8501	34.898	0.888575	1.67053	0.0178	0.446368	no
XLOC_005294	XLOC_005294	Actn1	12:80167541-80260371	q1	q2	OK	15.7404	29.8536	0.923432	1.66217	0.01765	0.446368	no
XLOC_008313	XLOC_008313	1810041L15Rik	15:84379202-84447097	q1	q2	OK	9.09311	17.432	0.938891	1.70102	0.0177	0.446368	no
XLOC_024454	XLOC_024454	C2cd2l	9:44309236-44320282	q1	q2	OK	31.8838	61.7788	0.954288	1.67875	0.0181	0.446368	no
XLOC_018535	XLOC_018535	Ppp1r9a	6:4903319-5165661	q1	q2	OK	28.0706	54.7706	0.964342	1.65436	0.01805	0.446368	no
XLOC_004570	XLOC_004570	Rab40b	11:121356120-121388251	q1	q2	OK	13.1702	27.6062	1.06772	1.66662	0.0177	0.446368	no
XLOC_011914	XLOC_011914	Kcnip2	19:45793669-45815803	q1	q2	OK	40.5662	89.2278	1.13721	1.7138	0.01805	0.446368	no
XLOC_024099	XLOC_024099	Camkv	9:107935919-107949691	q1	q2	OK	112.913	257.921	1.19172	1.6123	0.0179	0.446368	no
XLOC_024565	XLOC_024565	Islr2	9:58196296-58208808	q1	q2	OK	8.65889	20.0554	1.21174	1.7317	0.01815	0.446368	no
XLOC_004334	XLOC_004334	Kcnh4	11:100740377-100759778	q1	q2	OK	2.53483	6.68487	1.39901	1.81493	0.018	0.446368	no
XLOC_009865	XLOC_009865	Fam179a	17:71673260-71729669	q1	q2	OK	0.848914	2.30167	1.43899	1.66524	0.018	0.446368	no
XLOC_018370	XLOC_018370	Serpine1	5:137061503-137072272	q1	q2	OK	0.356342	1.33274	1.90306	1.74026	0.0181	0.446368	no
XLOC_005530	XLOC_005530	Gpx6	13:21312202-21319624	q1	q2	OK	0.337327	1.99762	2.56606	2.02518	0.0183	0.449341	no
XLOC_024653	XLOC_024653	Cgnl1	9:71626508-71771602	q1	q2	OK	8.39395	4.23179	-0.988081	-1.65642	0.01855	0.454755	no
XLOC_005921	XLOC_005921	Elovl7	13:108214403-108287109	q1	q2	OK	7.78043	3.88804	-1.00081	-1.68502	0.0187	0.456256	no
XLOC_002092	XLOC_002092	Grm1	10:10686058-11082331	q1	q2	OK	20.8766	10.7048	-0.963626	-1.67531	0.01865	0.456256	no
XLOC_019150	XLOC_019150	Atf7ip	6:136518850-136607379	q1	q2	OK	13.1279	24.404	0.894481	1.67448	0.0187	0.456256	no
XLOC_007470	XLOC_007470	Dgkh	14:78569608-78725089	q1	q2	OK	4.57482	9.46932	1.04955	1.68897	0.01885	0.45919	no
XLOC_015110	XLOC_015110	Adamtsl4	3:95676203-95687858	q1	q2	OK	6.07641	2.76135	-1.13784	-1.71311	0.0189	0.459681	no
XLOC_010772	XLOC_010772	Gm4951	18:60212076-60247820	q1	q2	OK	1.1643	0.132214	-3.13852	-2.18003	0.019	0.459704	no
XLOC_013110	XLOC_013110	5430407P10Rik	2:6098499-6130185	q1	q2	OK	1.84162	0.5941	-1.6322	-1.76055	0.01895	0.459704	no
XLOC_011868	XLOC_011868	Opalin	19:41063419-41077113	q1	q2	OK	44.0743	22.3031	-0.982692	-1.60152	0.019	0.459704	no
XLOC_014212	XLOC_014212	Skil	3:31095060-31122577	q1	q2	OK	9.89931	17.8732	0.852395	1.61041	0.01905	0.459704	no
XLOC_024528	XLOC_024528	Tnfaip8l3	9:54025605-54068411	q1	q2	OK	2.41298	6.40517	1.40842	1.75306	0.01905	0.459704	no
XLOC_016909	XLOC_016909	Hes3	4:152285971-152291662	q1	q2	OK	8.3833	0.110707	-6.2427	-4.65667	0.0191	0.460191	no
XLOC_012095	XLOC_012095	Gad2	2:22622326-22693877	q1	q2	OK	41.019	78.4965	0.936335	1.62153	0.01915	0.460676	no
XLOC_013089	XLOC_013089	Myt1	2:181763331-181827775	q1	q2	OK	7.18519	3.45283	-1.05725	-1.64996	0.0192	0.461159	no
XLOC_008064	XLOC_008064	Kcnv1	15:45106283-45114934	q1	q2	OK	8.28213	18.554	1.16365	1.74096	0.01935	0.4626	no
XLOC_013064	XLOC_013064	Ntsr1	2:180499975-180544979	q1	q2	OK	1.79742	4.24334	1.23927	1.63031	0.01935	0.4626	no
XLOC_013366	XLOC_013366	Gcg	2:62474529-62483653	q1	q2	OK	0.545925	3.23247	2.56586	2.00471	0.01935	0.4626	no
XLOC_003629	XLOC_003629	Cabp7	11:4738820-4746778	q1	q2	OK	46.8157	21.1525	-1.14616	-1.69043	0.0195	0.465464	no
XLOC_014000	XLOC_014000	Emilin3	2:160906437-160912328	q1	q2	OK	0.785567	0.0538616	-3.86641	-2.66971	0.01955	0.465937	no
XLOC_021493	XLOC_021493	Dkkl1	7:45207524-45211883	q1	q2	OK	7.04493	20.0862	1.51154	1.95805	0.01965	0.466877	no
XLOC_010524	XLOC_010524	Kcng3	17:83585956-83631895	q1	q2	OK	0.192286	0.789044	2.03685	1.7299	0.01965	0.466877	no
XLOC_013374	XLOC_013374	Scn3a	2:65457117-65567492	q1	q2	OK	4.10122	7.88018	0.942173	1.65492	0.0198	0.469717	no
XLOC_000733	XLOC_000733	Slco5a1	1:12866548-12991135	q1	q2	OK	0.635481	1.59504	1.32767	1.69977	0.0199	0.471364	no
XLOC_004331	XLOC_004331	Dhx58	11:100694883-100704271	q1	q2	OK	1.27282	0.312297	-2.02704	-1.75993	0.02	0.471945	no
XLOC_010885	XLOC_010885	Mpp7	18:7347961-7626863	q1	q2	OK	4.71385	2.13532	-1.14245	-1.59029	0.0202	0.471945	no
XLOC_024729	XLOC_024729	Pls1	9:95752641-95845279	q1	q2	OK	6.12399	2.97718	-1.04052	-1.57354	0.0202	0.471945	no
XLOC_014491	XLOC_014491	Fam63a	3:95282934-95307176	q1	q2	OK	16.6504	8.16167	-1.02862	-1.64784	0.0202	0.471945	no
XLOC_023389	XLOC_023389	Maf	8:115703252-115706894	q1	q2	OK	8.17813	4.11127	-0.992184	-1.58697	0.0201	0.471945	no
XLOC_005049	XLOC_005049	Inf2	12:112588783-112615557	q1	q2	OK	29.8713	58.2888	0.964457	1.65332	0.0202	0.471945	no
XLOC_013221	XLOC_013221	Fam163b	2:27110378-27142477	q1	q2	OK	34.5134	70.879	1.0382	1.72486	0.02015	0.471945	no
XLOC_024860	XLOC_024860	Arpp21	9:112065090-112280333	q1	q2	OK	80.5226	188.589	1.22778	1.8383	0.02	0.471945	no
XLOC_014988	XLOC_014988	Ntrk1	3:87778243-87795162	q1	q2	OK	0.819146	2.68597	1.71325	1.78956	0.02005	0.471945	no
XLOC_003489	XLOC_003489	Kcnj2	11:111066163-111076825	q1	q2	OK	3.28732	6.56303	0.997451	1.64228	0.02035	0.473299	no
XLOC_021967	XLOC_021967	Syt17	7:118381855-118443552	q1	q2	OK	12.2638	25.7136	1.06812	1.66114	0.02035	0.473299	no
XLOC_010703	XLOC_010703	2900055J20Rik	18:40256961-40257703	q1	q2	OK	2.03445	7.27567	1.83844	1.70998	0.02035	0.473299	no
XLOC_016779	XLOC_016779	Cda	4:138338527-138367955	q1	q2	OK	4.56711	1.09217	-2.06408	-1.81986	0.02055	0.474373	no
XLOC_010424	XLOC_010424	Plin3	17:56278961-56290511	q1	q2	OK	16.3083	8.14197	-1.00216	-1.64085	0.02055	0.474373	no
XLOC_009051	XLOC_009051	Apod	16:31280856-31314596	q1	q2	OK	152.53	82.5416	-0.885898	-1.58695	0.02055	0.474373	no
XLOC_015579	XLOC_015579	Zfp462	4:54947944-55083563	q1	q2	OK	5.22763	9.53613	0.867247	1.63496	0.02045	0.474373	no
XLOC_024619	XLOC_024619	Ankdd1a	9:65501983-65520193	q1	q2	OK	0.295991	1.54746	2.38628	1.9145	0.02055	0.474373	no
XLOC_021762	XLOC_021762	Folr1	7:101858330-101870788	q1	q2	OK	4.18471	1.07215	-1.96463	-1.79766	0.02065	0.47455	no
XLOC_016356	XLOC_016356	Lpar1	4:58435251-58553491	q1	q2	OK	18.8689	10.0517	-0.908575	-1.64219	0.02065	0.47455	no
XLOC_020957	XLOC_020957	Bc1	7:144914469-144914623	q1	q2	OK	3587.71	6679.14	0.896598	1.65452	0.02065	0.47455	no
XLOC_003951	XLOC_003951	Chd3	11:69344350-69369391	q1	q2	OK	70.303	147.23	1.06641	1.66517	0.02085	0.477013	no
XLOC_018845	XLOC_018845	Tacr1	6:82402474-82560104	q1	q2	OK	1.45242	3.24612	1.16026	1.61774	0.02085	0.477013	no
XLOC_009896	XLOC_009896	Gm6594	17:82539257-82539545	q1	q2	OK	0	1.45128	inf	#NAME?	0.0208	0.477013	no
XLOC_000372	XLOC_000372	Cdh7	1:109983736-110139001	q1	q2	OK	6.24234	2.88658	-1.11273	-1.62123	0.0209	0.477449	no
XLOC_026124	XLOC_026124	Ppef1	X:160623093-160719972	q1	q2	OK	0.236096	1.06929	2.17921	1.87566	0.02095	0.477883	no
XLOC_008460	XLOC_008460	Krt77	15:101859855-101869618	q1	q2	OK	2.82291	8.13453	1.52687	1.78888	0.02105	0.478043	no
XLOC_000304	XLOC_000304	Prlh	1:90953107-90954012	q1	q2	OK	2.21442	0	#NAME?	#NAME?	0.02105	0.478043	no
XLOC_008812	XLOC_008812	1700066C05Rik	16:79999381-80000544	q1	q2	OK	0.780266	0	#NAME?	#NAME?	0.02105	0.478043	no
XLOC_008435	XLOC_008435	Cela1	15:100674421-100687920	q1	q2	OK	3.85084	1.13623	-1.76092	-1.68659	0.02115	0.479607	no
XLOC_003009	XLOC_003009	Ccdc42	11:68587036-68597951	q1	q2	OK	1.17124	6.39354	2.44858	2.06062	0.0212	0.480035	no
XLOC_009955	XLOC_009955	Fndc1	17:7738567-7804974	q1	q2	OK	0.734893	1.93743	1.39854	1.73381	0.02125	0.480462	no
XLOC_005630	XLOC_005630	Serpinb1b	13:33084102-33094380	q1	q2	OK	5.7847	2.07878	-1.4765	-1.69253	0.0214	0.482439	no
XLOC_007424	XLOC_007424	Rhobtb2	14:69784989-69805545	q1	q2	OK	17.5712	32.33	0.879664	1.666	0.0214	0.482439	no
XLOC_011519	XLOC_011519	Neurl1a	19:47178819-47259441	q1	q2	OK	44.8419	85.2408	0.926697	1.64456	0.02155	0.484404	no
XLOC_017678	XLOC_017678	Elfn1	5:139907942-139974725	q1	q2	OK	5.16667	10.6584	1.04468	1.6884	0.02155	0.484404	no
XLOC_003048	XLOC_003048	Asgr1	11:70054368-70057894	q1	q2	OK	5.20961	1.57618	-1.72475	-1.75658	0.0216	0.484533	no
XLOC_001449	XLOC_001449	Akap12	10:4266328-4359471	q1	q2	OK	14.8181	7.51454	-0.979602	-1.66856	0.02165	0.484533	no
XLOC_013394	XLOC_013394	Dlx2	2:71543407-71546754	q1	q2	OK	1.23414	4.0897	1.72849	1.84118	0.02165	0.484533	no
XLOC_017159	XLOC_017159	Jakmip1	5:37050856-37125298	q1	q2	OK	25.1962	46.8664	0.895352	1.61253	0.02215	0.495004	no
XLOC_003483	XLOC_003483	Arsg	11:109440077-109573330	q1	q2	OK	17.8186	7.97536	-1.15976	-1.60386	0.0222	0.495404	no
XLOC_021988	XLOC_021988	Cdr2	7:120957035-120982312	q1	q2	OK	14.2689	7.23524	-0.979764	-1.58784	0.0224	0.499145	no
XLOC_004446	XLOC_004446	Cpsf4l	11:113698170-113710017	q1	q2	OK	1.31919	0.285025	-2.2105	-1.51416	0.02255	0.499661	no
XLOC_008327	XLOC_008327	Cerk	15:86139100-86186141	q1	q2	OK	40.1344	20.0137	-1.00385	-1.68286	0.0226	0.499661	no
XLOC_013784	XLOC_013784	Gatm	2:122594472-122611277	q1	q2	OK	70.9035	39.3963	-0.847797	-1.58239	0.02265	0.499661	no
XLOC_018298	XLOC_018298	Pitpnm2	5:124118689-124216418	q1	q2	OK	24.3343	47.2978	0.95878	1.62721	0.0226	0.499661	no
XLOC_023234	XLOC_023234	Junb	8:84976908-84978748	q1	q2	OK	20.7554	41.7702	1.00898	1.67879	0.02265	0.499661	no
XLOC_022485	XLOC_022485	Lpl	8:68880554-68906932	q1	q2	OK	4.50556	9.59867	1.09113	1.62033	0.0225	0.499661	no
XLOC_011898	XLOC_011898	Pkd2l1	19:44147636-44192442	q1	q2	OK	1.54285	3.7027	1.26298	1.59746	0.02255	0.499661	no
XLOC_001000	XLOC_001000	Ngef	1:87476828-87573870	q1	q2	OK	72.2073	148.377	1.03905	1.57754	0.0228	0.502251	no
XLOC_023716	XLOC_023716	Scn3b	9:40269215-40291618	q1	q2	OK	24.2289	49.5728	1.03282	1.701	0.02285	0.502635	no
XLOC_024644	XLOC_024644	Fam81a	9:70089309-70141557	q1	q2	OK	33.5915	63.8876	0.927441	1.55644	0.02325	0.510705	no
XLOC_008624	XLOC_008624	Ahsg	16:22892041-22899438	q1	q2	OK	2.34305	0.173147	-3.75832	-2.57273	0.0234	0.511822	no
XLOC_002908	XLOC_002908	Gm12250	11:58183842-58190198	q1	q2	OK	0.94628	0.0920275	-3.36213	-2.2531	0.0235	0.511822	no
XLOC_000512	XLOC_000512	BC026585	1:157458581-157488733	q1	q2	OK	10.4154	4.37707	-1.25068	-1.63131	0.0235	0.511822	no
XLOC_006187	XLOC_006187	Fgd3	13:49263109-49309208	q1	q2	OK	5.09634	2.2736	-1.16448	-1.60447	0.02345	0.511822	no
XLOC_002140	XLOC_002140	Akap7	10:25169089-25299163	q1	q2	OK	17.0659	9.0691	-0.912085	-1.62272	0.0234	0.511822	no
XLOC_002462	XLOC_002462	Apaf1	10:90989310-91082743	q1	q2	OK	2.43943	4.89481	1.00471	1.61035	0.02345	0.511822	no
XLOC_011533	XLOC_011533	Dusp5	19:53529317-53541322	q1	q2	OK	14.9556	5.78245	-1.37093	-1.69697	0.0236	0.512195	no
XLOC_000784	XLOC_000784	Bend6	1:33852051-33907621	q1	q2	OK	110.668	59.3644	-0.898569	-1.59665	0.0236	0.512195	no
XLOC_018030	XLOC_018030	Epha5	5:84054760-84417382	q1	q2	OK	7.56218	14.0524	0.893938	1.62075	0.02365	0.512195	no
XLOC_001190	XLOC_001190	LOC100861876	1:152674948-152766336	q1	q2	OK	8.49415	22.9493	1.43391	1.63046	0.02365	0.512195	no
XLOC_019465	XLOC_019465	Vamp8	6:72385220-72390667	q1	q2	OK	24.6225	11.0748	-1.1527	-1.59969	0.0238	0.514721	no
XLOC_022007	XLOC_022007	Gsg1l	7:125878418-126082411	q1	q2	OK	16.3859	30.5462	0.898533	1.57779	0.0239	0.51616	no
XLOC_024215	XLOC_024215	Kbtbd5	9:121777606-121783819	q1	q2	OK	1.69693	4.9478	1.54386	1.74499	0.02395	0.516516	no
XLOC_013615	XLOC_013615	Gm17281	2:91250742-91255999	q1	q2	OK	0.740596	0.1762	-2.07147	-1.7469	0.024	0.516872	no
XLOC_014173	XLOC_014173	Car13	3:14641726-14663002	q1	q2	OK	2.18652	0.700179	-1.64284	-1.64322	0.0242	0.520452	no
XLOC_005220	XLOC_005220	Nkx2-9	12:56611392-56613284	q1	q2	OK	1.63609	0.170201	-3.26495	-2.2299	0.0245	0.520608	no
XLOC_011724	XLOC_011724	AW112010	19:11047611-11050566	q1	q2	OK	5.38459	0.802153	-2.74689	-2.05149	0.0248	0.520608	no
XLOC_019024	XLOC_019024	Ninj2	6:120093379-120200338	q1	q2	OK	4.76284	1.44617	-1.71959	-1.63912	0.0244	0.520608	no
XLOC_000579	XLOC_000579	Pvrl4	1:171370172-171388287	q1	q2	OK	3.15629	1.28124	-1.30069	-1.58516	0.02495	0.520608	no
XLOC_023100	XLOC_023100	Tll1	8:64014769-64205993	q1	q2	OK	2.69757	1.16776	-1.20792	-1.54126	0.02475	0.520608	no
XLOC_007594	XLOC_007594	Dap	15:31224384-31274338	q1	q2	OK	9.72038	4.40369	-1.1423	-1.52222	0.02465	0.520608	no
XLOC_004788	XLOC_004788	Plekhg3	12:76533559-76579039	q1	q2	OK	6.88924	3.48918	-0.981459	-1.58149	0.02445	0.520608	no
XLOC_016604	XLOC_016604	Rimkla	4:119465282-119492598	q1	q2	OK	10.4827	5.34136	-0.972729	-1.59915	0.02485	0.520608	no
XLOC_024315	XLOC_024315	S1pr5	9:21242916-21248443	q1	q2	OK	14.5112	7.44599	-0.962633	-1.59526	0.02495	0.520608	no
XLOC_001086	XLOC_001086	Tmem163	1:127490341-127678021	q1	q2	OK	18.5891	9.82583	-0.919806	-1.55168	0.02495	0.520608	no
XLOC_013847	XLOC_013847	1700037H04Rik	2:131146324-131160020	q1	q2	OK	42.3115	76.2874	0.850395	1.59655	0.02455	0.520608	no
XLOC_021661	XLOC_021661	Homer2	7:81600480-81706925	q1	q2	OK	4.5796	8.27751	0.853974	1.56251	0.02445	0.520608	no
XLOC_023473	XLOC_023473	1700054N08Rik	8:123837724-123860209	q1	q2	OK	13.998	25.56	0.868664	1.56655	0.0244	0.520608	no
XLOC_015821	XLOC_015821	Hivep3	4:119814677-120135411	q1	q2	OK	3.27355	5.99126	0.872003	1.56544	0.0247	0.520608	no
XLOC_022239	XLOC_022239	Myo16	8:10153922-10633950	q1	q2	OK	4.96595	9.11736	0.876546	1.57912	0.0245	0.520608	no
XLOC_012411	XLOC_012411	Fam171b	2:83812727-83881358	q1	q2	OK	43.1955	79.9081	0.887461	1.62615	0.02495	0.520608	no
XLOC_010917	XLOC_010917	Fam59a	18:21127341-21300139	q1	q2	OK	4.64877	8.81131	0.922507	1.60403	0.0249	0.520608	no
XLOC_004944	XLOC_004944	Vrk1	12:106010262-106077410	q1	q2	OK	4.68375	9.01888	0.945283	1.59981	0.0246	0.520608	no
XLOC_010771	XLOC_010771	Chsy3	18:59175339-59411336	q1	q2	OK	2.0237	4.4406	1.13376	1.58098	0.0243	0.520608	no
XLOC_019611	XLOC_019611	Oxtr	6:112473683-112489808	q1	q2	OK	1.46602	3.33032	1.18376	1.56883	0.0248	0.520608	no
XLOC_016117	XLOC_016117	Gm13111	4:154637575-154644724	q1	q2	OK	2.22079	5.1196	1.20496	1.63435	0.02465	0.520608	no
XLOC_014762	XLOC_014762	Rpe65	3:159599180-159625307	q1	q2	OK	0.307532	1.89837	2.62595	2.04598	0.02445	0.520608	no
XLOC_010704	XLOC_010704	Kctd16	18:40258360-40531184	q1	q2	OK	3.8915	9.87471	1.34341	1.66507	0.025	0.520946	no
XLOC_013199	XLOC_013199	C030048H21Rik	2:26246332-26268331	q1	q2	OK	1.81684	4.37879	1.2691	1.63873	0.02545	0.529607	no
XLOC_006851	XLOC_006851	2700070H01Rik	14:63055072-63058149	q1	q2	OK	1.48708	0.148978	-3.31931	-2.2918	0.0256	0.532011	no
XLOC_011941	XLOC_011941	5830416P10Rik	19:53441211-53464796	q1	q2	OK	0.747253	0.23543	-1.6663	-1.60067	0.0257	0.532653	no
XLOC_013369	XLOC_013369	Kcnh7	2:62702945-63184287	q1	q2	OK	2.2445	4.77024	1.08767	1.58119	0.0257	0.532653	no
XLOC_010654	XLOC_010654	Psd2	18:35964834-36014715	q1	q2	OK	34.0328	18.2561	-0.898548	-1.57466	0.026	0.537426	no
XLOC_015627	XLOC_015627	Tyrp1	4:80834229-80851718	q1	q2	OK	0.148104	0.941721	2.66869	1.99748	0.026	0.537426	no
XLOC_022095	XLOC_022095	Ctbp2	7:132987010-133123483	q1	q2	OK	15.9721	8.56227	-0.89949	-1.54535	0.0262	0.540835	no
XLOC_021868	XLOC_021868	Dchs1	7:105752988-105787550	q1	q2	OK	1.95706	3.75225	0.939065	1.60973	0.02625	0.541143	no
XLOC_003144	XLOC_003144	Slc6a4	11:76998596-77032343	q1	q2	OK	2.17575	0.0616193	-5.14199	-3.59338	0.02635	0.541756	no
XLOC_000706	XLOC_000706	Gm19753	1:193272159-193273216	q1	q2	OK	7.15388	2.19039	-1.70754	-1.63719	0.02635	0.541756	no
XLOC_018132	XLOC_018132	Gbp8	5:105014152-105053561	q1	q2	OK	1.06984	0.0694792	-3.94467	-2.65728	0.02645	0.54195	no
XLOC_008816	XLOC_008816	A730009L09Rik	16:84515120-84523888	q1	q2	OK	0.735022	0.127079	-2.53206	-1.87309	0.0265	0.54195	no
XLOC_023769	XLOC_023769	Apoa1	9:46228629-46230466	q1	q2	OK	2.79608	0.596264	-2.22939	-1.7786	0.0265	0.54195	no
XLOC_014477	XLOC_014477	Celf3	3:94478830-94492193	q1	q2	OK	34.5538	66.0696	0.935144	1.60593	0.02645	0.54195	no
XLOC_002628	XLOC_002628	Rdh5	10:128913589-128919297	q1	q2	OK	6.59211	2.53779	-1.37717	-1.57687	0.0267	0.545317	no
XLOC_009866	XLOC_009866	Clip4	17:71769690-71858351	q1	q2	OK	13.0571	23.5457	0.850637	1.56506	0.0268	0.546635	no
XLOC_024859	XLOC_024859	Stac	9:111561433-111690216	q1	q2	OK	3.54322	1.3381	-1.40487	-1.60323	0.02705	0.547683	no
XLOC_020453	XLOC_020453	Acan	7:79053482-79115099	q1	q2	OK	1.2041	0.469294	-1.35939	-1.60112	0.0271	0.547683	no
XLOC_003166	XLOC_003166	Spag5	11:78301590-78322454	q1	q2	OK	6.13565	2.91628	-1.07308	-1.62232	0.027	0.547683	no
XLOC_012811	XLOC_012811	Tmem90b	2:149830782-150004392	q1	q2	OK	30.6011	16.3127	-0.90759	-1.58687	0.0269	0.547683	no
XLOC_001299	XLOC_001299	Pcp4l1	1:171173263-171196268	q1	q2	OK	89.4484	167.061	0.901246	1.55332	0.02705	0.547683	no
XLOC_000759	XLOC_000759	Kcnq5	1:21398402-21961942	q1	q2	OK	6.54258	12.8083	0.969147	1.6067	0.0271	0.547683	no
XLOC_009340	XLOC_009340	Slc22a2	17:12584188-12628488	q1	q2	OK	0.194503	0.940821	2.27413	1.81439	0.027	0.547683	no
XLOC_018058	XLOC_018058	Gc	5:89417510-89457898	q1	q2	OK	1.4587	0.178263	-3.0326	-2.06038	0.02725	0.549275	no
XLOC_003455	XLOC_003455	Tanc2	11:105589985-105929304	q1	q2	OK	12.0994	22.4696	0.89304	1.58561	0.02725	0.549275	no
XLOC_005833	XLOC_005833	Slc9a3	13:74121514-74166064	q1	q2	OK	1.02007	0.125458	-3.02339	-2.04853	0.02745	0.552584	no
XLOC_014956	XLOC_014956	Gucy1a3	3:82092426-82145877	q1	q2	OK	19.8199	35.341	0.834399	1.55623	0.0275	0.552868	no
XLOC_025202	XLOC_025202	Prrg3	X:71963020-71972728	q1	q2	OK	6.40811	11.4567	0.838219	1.52883	0.02755	0.553152	no
XLOC_014431	XLOC_014431	S100a5	3:90608521-90611780	q1	q2	OK	1.15848	9.80843	3.08178	2.27097	0.0276	0.553436	no
XLOC_015883	XLOC_015883	Fndc5	4:129137059-129144593	q1	q2	OK	62.4882	33.5674	-0.896525	-1.57463	0.0277	0.554719	no
XLOC_023808	XLOC_023808	Sln	9:53850250-53853849	q1	q2	OK	1.44145	6.53279	2.18017	1.77715	0.02805	0.561	no
XLOC_014838	XLOC_014838	Anxa5	3:36448922-36475887	q1	q2	OK	47.109	24.2794	-0.956269	-1.56541	0.02815	0.562271	no
XLOC_013257	XLOC_013257	Fnbp1	2:31026205-31142008	q1	q2	OK	67.4205	34.3118	-0.974482	-1.52157	0.0282	0.562541	no
XLOC_024081	XLOC_024081	Cish	9:107296688-107301961	q1	q2	OK	2.9946	6.61311	1.14297	1.5506	0.02825	0.56281	no
XLOC_003023	XLOC_003023	Alox12b	11:69157071-69169791	q1	q2	OK	0.986891	3.29312	1.73849	1.70296	0.0283	0.563079	no
XLOC_003631	XLOC_003631	Nefh	11:4938753-5042794	q1	q2	OK	75.1826	16.5336	-2.185	-1.8741	0.02835	0.563347	no
XLOC_011127	XLOC_011127	Hsbp1l1	18:80229750-80247102	q1	q2	OK	1.71435	0.36313	-2.2391	-1.81641	0.02845	0.564606	no
XLOC_014303	XLOC_014303	Rap2b	3:61364506-61368703	q1	q2	OK	11.4642	21.0541	0.876959	1.54565	0.0285	0.564871	no
XLOC_022914	XLOC_022914	Efnb2	8:8617438-8660773	q1	q2	OK	10.4335	18.6992	0.841751	1.55504	0.02855	0.565136	no
XLOC_004425	XLOC_004425	Prkca	11:107933386-108343888	q1	q2	OK	16.8783	30.2848	0.843421	1.52648	0.02875	0.568365	no
XLOC_007528	XLOC_007528	2610035F20Rik	14:122470376-122475199	q1	q2	OK	3.45265	0.862463	-2.00117	-1.72241	0.02885	0.569612	no
XLOC_008469	XLOC_008469	Itgb7	15:102215994-102231935	q1	q2	OK	1.01297	0.24563	-2.04403	-1.75221	0.02895	0.570855	no
XLOC_017570	XLOC_017570	Tmem132c	5:127241825-127565790	q1	q2	OK	4.07625	2.00167	-1.02604	-1.5188	0.029	0.571111	no
XLOC_021562	XLOC_021562	Gabrg3	7:56724241-57386871	q1	q2	OK	1.46145	4.33705	1.56932	1.67889	0.0291	0.572349	no
XLOC_024892	XLOC_024892	Scn5a	9:119483407-119579016	q1	q2	OK	0.883491	2.09421	1.24512	1.60049	0.0293	0.575549	no
XLOC_008349	XLOC_008349	Syt10	15:89782392-89841860	q1	q2	OK	3.53582	7.83061	1.14708	1.54902	0.02955	0.579721	no
XLOC_022156	XLOC_022156	B230206H07Rik	7:141339001-141365110	q1	q2	OK	3.58612	0.884942	-2.01877	-1.61171	0.02985	0.580187	no
XLOC_021832	XLOC_021832	Trim12a	7:104299896-104324838	q1	q2	OK	2.91143	0.920106	-1.66186	-1.61505	0.02985	0.580187	no
XLOC_002026	XLOC_002026	Stat2	10:128270575-128292849	q1	q2	OK	12.4057	6.83798	-0.859364	-1.54938	0.02965	0.580187	no
XLOC_014427	XLOC_014427	S100a16	3:90541222-90543151	q1	q2	OK	80.5198	44.8694	-0.843611	-1.54645	0.02995	0.580187	no
XLOC_018587	XLOC_018587	Ccdc136	6:29398925-29426995	q1	q2	OK	24.5184	13.8314	-0.825921	-1.53499	0.0299	0.580187	no
XLOC_015453	XLOC_015453	Rragd	4:32982997-33022180	q1	q2	OK	26.3568	45.8884	0.799958	1.49366	0.02995	0.580187	no
XLOC_010635	XLOC_010635	Apc	18:34207774-34322190	q1	q2	OK	27.676	51.0363	0.882886	1.48107	0.02985	0.580187	no
XLOC_021254	XLOC_021254	Grik5	7:25009848-25072369	q1	q2	OK	48.2646	89.4062	0.889408	1.52906	0.0297	0.580187	no
XLOC_020217	XLOC_020217	Dmkn	7:30763755-30781066	q1	q2	OK	1.73924	8.75747	2.33205	1.89039	0.02985	0.580187	no
XLOC_011123	XLOC_011123	Slc14a2	18:78146143-78596950	q1	q2	OK	0.190349	1.27615	2.74508	1.54773	0.02985	0.580187	no
XLOC_020454	XLOC_020454	Abhd2	7:79273265-79361601	q1	q2	OK	13.8429	24.4714	0.821955	1.52371	0.03	0.580427	no
XLOC_010773	XLOC_010773	F830016B08Rik	18:60293379-60303016	q1	q2	OK	0.71936	0.164993	-2.12431	-1.68882	0.03015	0.58089	no
XLOC_005582	XLOC_005582	Hist1h1c	13:23738806-23740367	q1	q2	OK	21.4032	10.9907	-0.961543	-1.54148	0.03025	0.58089	no
XLOC_023280	XLOC_023280	Pllp	8:94674894-94696242	q1	q2	OK	48.3621	27.2793	-0.826069	-1.51719	0.0301	0.58089	no
XLOC_014261	XLOC_014261	Foxo1	3:52268336-52350109	q1	q2	OK	6.04358	10.984	0.861931	1.55891	0.03015	0.58089	no
XLOC_008865	XLOC_008865	Cbr3	16:93683218-93690991	q1	q2	OK	6.17159	13.9043	1.17182	1.56394	0.03025	0.58089	no
XLOC_013220	XLOC_013220	Tmem8c	2:27061635-27072161	q1	q2	OK	0.219925	1.29741	2.56055	1.70819	0.03025	0.58089	no
XLOC_015764	XLOC_015764	Tal1	4:115059526-115071755	q1	q2	OK	1.15764	0.392729	-1.55958	-1.62415	0.03045	0.584004	no
XLOC_017388	XLOC_017388	Lrrc8b	5:105415774-105486189	q1	q2	OK	10.6765	19.2638	0.851453	1.53165	0.0305	0.584236	no
XLOC_003351	XLOC_003351	Pnmt	11:98386631-98388097	q1	q2	OK	0.323678	2.95422	3.19014	2.20375	0.03055	0.584468	no
XLOC_019754	XLOC_019754	Clec7a	6:129461590-129472777	q1	q2	OK	0.898427	0.196116	-2.19569	-1.76909	0.0307	0.584897	no
XLOC_025889	XLOC_025889	Prrg1	X:78449612-78583896	q1	q2	OK	3.15717	1.41214	-1.16075	-1.52706	0.0307	0.584897	no
XLOC_007410	XLOC_007410	Nefm	14:68119544-68131371	q1	q2	OK	116.431	56.236	-1.04991	-1.48624	0.0308	0.584897	no
XLOC_000644	XLOC_000644	Itpkb	1:180326968-180423659	q1	q2	OK	16.0903	8.38425	-0.940439	-1.54072	0.03065	0.584897	no
XLOC_008436	XLOC_008436	Galnt6	15:100689914-100729376	q1	q2	OK	5.46886	2.89449	-0.917932	-1.54412	0.03075	0.584897	no
XLOC_017567	XLOC_017567	Tmem132b	5:125532417-125792583	q1	q2	OK	13.6157	25.4355	0.901571	1.53231	0.0308	0.584897	no
XLOC_008077	XLOC_008077	Tnfrsf11b	15:54250618-54278484	q1	q2	OK	1.74565	0.576446	-1.59851	-1.6038	0.03095	0.587022	no
XLOC_015490	XLOC_015490	Gm3893	4:42089372-42092930	q1	q2	OK	0.87093	0.282331	-1.62517	-1.55107	0.03105	0.588195	no
XLOC_015857	XLOC_015857	Grik3	4:125490830-125714173	q1	q2	OK	10.8099	19.0463	0.817149	1.54789	0.03115	0.588643	no
XLOC_007778	XLOC_007778	Cacna1i	15:80287237-80398292	q1	q2	OK	9.44005	16.6787	0.821142	1.55216	0.03115	0.588643	no
XLOC_019734	XLOC_019734	Tead4	6:128227142-128300813	q1	q2	OK	0.741742	0.182261	-2.02491	-1.58171	0.03135	0.588764	no
XLOC_000791	XLOC_000791	Neurl3	1:36264601-36273425	q1	q2	OK	0.991797	0.249314	-1.99208	-1.67633	0.0313	0.588764	no
XLOC_005616	XLOC_005616	Mboat1	13:30136489-30246694	q1	q2	OK	2.15207	0.743365	-1.53358	-1.63636	0.03125	0.588764	no
XLOC_020777	XLOC_020777	Il4ra	7:125552281-125579474	q1	q2	OK	2.22328	0.970606	-1.19573	-1.55492	0.0315	0.588764	no
XLOC_005673	XLOC_005673	Rnf182	13:43615796-43670944	q1	q2	OK	8.71909	4.54652	-0.939414	-1.48208	0.03145	0.588764	no
XLOC_024606	XLOC_024606	Smad3	9:63646766-63757994	q1	q2	OK	11.6041	20.7324	0.837256	1.55674	0.0314	0.588764	no
XLOC_000844	XLOC_000844	Myo1b	1:51749764-51915974	q1	q2	OK	6.7485	12.0849	0.84057	1.50651	0.03135	0.588764	no
XLOC_004248	XLOC_004248	Cacnb1	11:98002900-98022627	q1	q2	OK	28.9235	52.8163	0.868741	1.48853	0.0315	0.588764	no
XLOC_023858	XLOC_023858	Celf6	9:59578336-59607292	q1	q2	OK	7.90427	14.4899	0.874346	1.48734	0.0314	0.588764	no
XLOC_013630	XLOC_013630	Cd82	2:93419111-93469874	q1	q2	OK	20.7183	11.0492	-0.906955	-1.5274	0.03155	0.588984	no
XLOC_015083	XLOC_015083	1700040D17Rik	3:94409388-94412945	q1	q2	OK	3.8984	1.04654	-1.89726	-1.65134	0.03165	0.589424	no
XLOC_012763	XLOC_012763	Btbd3	2:138256583-138287422	q1	q2	OK	72.0211	37.0611	-0.958514	-1.59961	0.03165	0.589424	no
XLOC_005770	XLOC_005770	Dapk1	13:60601946-60763186	q1	q2	OK	14.5849	27.534	0.916736	1.53437	0.0317	0.589643	no
XLOC_016260	XLOC_016260	LOC100861661,LOC100861670	4:42377726-42385997	q1	q2	OK	2.46873	0.815894	-1.59732	-1.5249	0.0318	0.59079	no
XLOC_006918	XLOC_006918	Lcp1	14:75131122-75230842	q1	q2	OK	6.64356	3.21573	-1.04681	-1.57697	0.032	0.593791	no
XLOC_008759	XLOC_008759	Myh15	16:49057485-49199104	q1	q2	OK	0.393351	0.989969	1.33157	1.51802	0.0321	0.59493	no
XLOC_002678	XLOC_002678	Dusp18	11:3895239-3901296	q1	q2	OK	5.59855	10.2334	0.870165	1.4906	0.03215	0.595142	no
XLOC_024216	XLOC_024216	Ccbp2	9:121898463-121911064	q1	q2	OK	0.542719	1.69285	1.64117	1.56437	0.0322	0.595353	no
XLOC_021629	XLOC_021629	Mfge8	7:79133767-79149060	q1	q2	OK	59.5353	108.966	0.872064	1.51888	0.03225	0.595563	no
XLOC_017052	XLOC_017052	Slc4a2	5:24425231-24440947	q1	q2	OK	19.2829	10.7882	-0.837867	-1.48735	0.0325	0.599462	no
XLOC_016010	XLOC_016010	Fam131c	4:141368219-141384175	q1	q2	OK	5.61653	1.94458	-1.53022	-1.60705	0.0326	0.599565	no
XLOC_008056	XLOC_008056	Angpt1	15:42424722-42704616	q1	q2	OK	3.03321	1.32425	-1.19567	-1.53306	0.0327	0.599565	no
XLOC_012215	XLOC_012215	Aif1l	2:31950302-31973442	q1	q2	OK	5.08235	2.41278	-1.0748	-1.48807	0.0327	0.599565	no
XLOC_011348	XLOC_011348	Prune2	19:16956117-17223932	q1	q2	OK	13.9405	7.70597	-0.855237	-1.52187	0.0327	0.599565	no
XLOC_012065	XLOC_012065	Vim	2:13571090-13582826	q1	q2	OK	56.5199	31.7453	-0.832215	-1.52754	0.03255	0.599565	no
XLOC_019830	XLOC_019830	Rerg	6:137054824-137170496	q1	q2	OK	5.16339	10.3111	0.997807	1.51169	0.0328	0.600684	no
XLOC_003190	XLOC_003190	Rhbdl3	11:80300911-80355986	q1	q2	OK	6.48532	11.6513	0.845237	1.49066	0.03285	0.600886	no
XLOC_003573	XLOC_003573	Baiap2	11:119943091-120006782	q1	q2	OK	66.9156	127.995	0.935678	1.53024	0.03305	0.603114	no
XLOC_001685	XLOC_001685	Upb1	10:75407033-75440197	q1	q2	OK	0.435929	1.74942	2.00471	1.67319	0.03305	0.603114	no
XLOC_004404	XLOC_004404	Smarcd2	11:106263170-106272972	q1	q2	OK	14.5658	7.55422	-0.947234	-1.52451	0.0331	0.603312	no
XLOC_023263	XLOC_023263	Irx3	8:91798510-91801654	q1	q2	OK	2.08472	0.0527499	-5.30454	-2.86464	0.03335	0.604493	no
XLOC_003774	XLOC_003774	Tgtp1	11:48985328-48992246	q1	q2	OK	0.923337	0.131754	-2.80902	-1.93109	0.03335	0.604493	no
XLOC_021751	XLOC_021751	Plekhb1	7:100643895-100662394	q1	q2	OK	341.265	177.899	-0.939831	-1.53728	0.0334	0.604493	no
XLOC_016189	XLOC_016189	Decr1	4:15917239-15945507	q1	q2	OK	8.90948	4.78125	-0.897953	-1.43533	0.0334	0.604493	no
XLOC_017868	XLOC_017868	Cgref1	5:30933142-30945480	q1	q2	OK	13.6592	26.5133	0.956848	1.52972	0.03335	0.604493	no
XLOC_000545	XLOC_000545	Dpt	1:164796731-164824266	q1	q2	OK	0.446177	2.06972	2.21375	1.79726	0.03325	0.604493	no
XLOC_019813	XLOC_019813	Gprc5d	6:135105990-135118283	q1	q2	OK	0.145186	0.775596	2.41741	1.40184	0.03345	0.604688	no
XLOC_000974	XLOC_000974	Sphkap	1:83255780-83408200	q1	q2	OK	54.5197	28.1243	-0.95496	-1.5257	0.0335	0.604883	no
XLOC_020877	XLOC_020877	Inpp5a	7:139389108-139582797	q1	q2	OK	63.5789	28.2082	-1.17243	-1.74057	0.03355	0.605077	no
XLOC_004447	XLOC_004447	Cdc42ep4	11:113726849-113751815	q1	q2	OK	28.9703	16.093	-0.848146	-1.47706	0.03375	0.607973	no
XLOC_008967	XLOC_008967	Car15	16:17835275-17838186	q1	q2	OK	5.9838	2.36325	-1.34029	-1.4589	0.034	0.611762	no
XLOC_006406	XLOC_006406	Pde8b	13:95024104-95250304	q1	q2	OK	12.9091	23.1326	0.841543	1.50003	0.0341	0.612846	no
XLOC_024908	XLOC_024908	Hhatl	9:121784015-121792507	q1	q2	OK	10.1722	4.86742	-1.0634	-1.51649	0.03425	0.61411	no
XLOC_016188	XLOC_016188	Necab1	4:14930640-15149131	q1	q2	OK	16.9859	30.6908	0.853469	1.47431	0.03425	0.61411	no
XLOC_001281	XLOC_001281	Pbx1	1:168119363-168432258	q1	q2	OK	21.1153	37.7151	0.836853	1.51319	0.0343	0.614293	no
XLOC_023630	XLOC_023630	Cdon	9:35452075-35507652	q1	q2	OK	4.01257	2.14008	-0.90686	-1.46387	0.03435	0.614474	no
XLOC_004778	XLOC_004778	1700086L19Rik	12:74284275-74295950	q1	q2	OK	14.5891	31.3174	1.10207	1.51768	0.0345	0.616443	no
XLOC_015273	XLOC_015273	Fnbp1l	3:122538718-122619667	q1	q2	OK	16.6001	29.6683	0.837733	1.50518	0.03485	0.621976	no
XLOC_010764	XLOC_010764	Ctxn3	18:57468485-57478134	q1	q2	OK	9.90391	4.33492	-1.19199	-1.49997	0.03505	0.624822	no
XLOC_020791	XLOC_020791	Fam57b	7:126816884-126830219	q1	q2	OK	43.0623	24.2491	-0.828496	-1.50827	0.0352	0.626048	no
XLOC_015836	XLOC_015836	Hpcal4	4:123183503-123194699	q1	q2	OK	117.145	266.062	1.18346	1.47938	0.0352	0.626048	no
XLOC_002493	XLOC_002493	Gm10754	10:97644067-97967090	q1	q2	OK	0.676344	4.0507	2.58234	2.03168	0.03525	0.626215	no
XLOC_013004	XLOC_013004	2010011I20Rik	2:172345576-172355749	q1	q2	OK	9.44987	16.867	0.835838	1.51715	0.03535	0.626548	no
XLOC_010070	XLOC_010070	Rab26	17:24529053-24533747	q1	q2	OK	17.015	31.8526	0.904604	1.46712	0.03535	0.626548	no
XLOC_015228	XLOC_015228	5330417C22Rik	3:108458068-108536522	q1	q2	OK	5.15825	9.75508	0.919271	1.46936	0.03555	0.62937	no
XLOC_020780	XLOC_020780	Sbk1	7:126272618-126294999	q1	q2	OK	61.7408	32.9309	-0.906785	-1.44117	0.0356	0.629532	no
XLOC_011416	XLOC_011416	I830012O16Rik	19:34607956-34613401	q1	q2	OK	3.80496	1.53061	-1.31377	-1.5293	0.03615	0.63161	no
XLOC_009514	XLOC_009514	Itpr3	17:27057303-27122223	q1	q2	OK	1.7034	0.816095	-1.06161	-1.44821	0.0362	0.63161	no
XLOC_021770	XLOC_021770	Rhog	7:102239122-102250118	q1	q2	OK	33.4139	17.7367	-0.913709	-1.51858	0.03625	0.63161	no
XLOC_016343	XLOC_016343	Ctnnal1	4:56810934-56865211	q1	q2	OK	8.53447	4.53201	-0.913151	-1.50698	0.03595	0.63161	no
XLOC_003282	XLOC_003282	Car10	11:93099289-93601751	q1	q2	OK	42.6883	24.0247	-0.829325	-1.51596	0.03625	0.63161	no
XLOC_001930	XLOC_001930	Osbpl8	10:111164801-111297247	q1	q2	OK	14.9479	25.9555	0.796094	1.47916	0.03625	0.63161	no
XLOC_015978	XLOC_015978	Sh2d5	4:138250410-138260968	q1	q2	OK	21.4873	37.6696	0.809921	1.45425	0.03585	0.63161	no
XLOC_025963	XLOC_025963	C77370	X:104077434-104201117	q1	q2	OK	3.25938	5.8296	0.838798	1.47684	0.0359	0.63161	no
XLOC_015979	XLOC_015979	Kif17	4:138262250-138301973	q1	q2	OK	6.29575	11.6843	0.892121	1.47646	0.0362	0.63161	no
XLOC_000912	XLOC_000912	Erbb4	1:68039965-69108059	q1	q2	OK	3.4443	6.66463	0.952315	1.50075	0.0362	0.63161	no
XLOC_002333	XLOC_002333	Lrrc3	10:77897574-77902536	q1	q2	OK	2.31507	4.78882	1.04861	1.52055	0.03625	0.63161	no
XLOC_013304	XLOC_013304	Lhx6	2:36081952-36105408	q1	q2	OK	3.71239	8.0558	1.11768	1.48409	0.0362	0.63161	no
XLOC_011722	XLOC_011722	Ms4a15	19:10978306-10993250	q1	q2	OK	0.0946785	2.96413	4.96843	3.27801	0.0359	0.63161	no
XLOC_012677	XLOC_012677	AA467197	2:122637886-122641076	q1	q2	OK	29.9853	0.3043	-6.62262	-1.54134	0.03635	0.632638	no
XLOC_012185	XLOC_012185	Cercam	2:29868725-29882840	q1	q2	OK	5.79609	2.67165	-1.11735	-1.50484	0.03655	0.63326	no
XLOC_015664	XLOC_015664	Mtap	4:89137369-89181090	q1	q2	OK	6.84492	3.43097	-0.996419	-1.44154	0.03645	0.63326	no
XLOC_018640	XLOC_018640	Clec2l	6:38663068-38680865	q1	q2	OK	49.7434	28.1252	-0.82264	-1.45758	0.03655	0.63326	no
XLOC_000701	XLOC_000701	Kcnh1	1:192190871-192510158	q1	q2	OK	9.50588	16.5517	0.800085	1.48535	0.0365	0.63326	no
XLOC_008841	XLOC_008841	Hunk	16:90386396-90499553	q1	q2	OK	6.37467	3.51054	-0.860659	-1.44062	0.0366	0.633414	no
XLOC_025455	XLOC_025455	Frmpd3	X:140381970-140394540	q1	q2	OK	2.76689	1.09638	-1.33552	-1.51548	0.0367	0.634433	no
XLOC_013733	XLOC_013733	A430105I19Rik	2:118754144-118762661	q1	q2	OK	3.14715	1.52315	-1.04699	-1.4677	0.03695	0.636054	no
XLOC_004914	XLOC_004914	Ifi27l1	12:103434188-103440245	q1	q2	OK	45.0243	24.5641	-0.874152	-1.47308	0.037	0.636054	no
XLOC_011772	XLOC_011772	Tle4	19:14448071-14597983	q1	q2	OK	11.0162	19.1811	0.800055	1.47482	0.0369	0.636054	no
XLOC_022908	XLOC_022908	Ctxn1	8:4257645-4259274	q1	q2	OK	166.486	321.991	0.951624	1.40868	0.037	0.636054	no
XLOC_024493	XLOC_024493	Htr3a	9:48899212-48911099	q1	q2	OK	2.33919	5.73799	1.29453	1.51845	0.03695	0.636054	no
XLOC_008026	XLOC_008026	Hrsp12	15:34484021-34495246	q1	q2	OK	62.6934	35.2596	-0.830298	-1.46311	0.0372	0.63878	no
XLOC_017490	XLOC_017490	Hrk	5:118169763-118189478	q1	q2	OK	7.17523	13.5754	0.919903	1.51048	0.03745	0.642357	no
XLOC_024813	XLOC_024813	Apeh	9:108085413-108094480	q1	q2	OK	14.8542	7.91143	-0.908857	-1.48817	0.0375	0.6425	no
XLOC_018873	XLOC_018873	Alms1	6:85587530-85702751	q1	q2	OK	3.31155	1.71117	-0.95252	-1.48774	0.0376	0.643498	no
XLOC_019634	XLOC_019634	Tmem40	6:115729130-115762466	q1	q2	OK	1.12666	3.34655	1.57062	1.34865	0.03775	0.645349	no
XLOC_019691	XLOC_019691	C1s	6:124530343-124542359	q1	q2	OK	0.864381	0.283331	-1.60918	-1.4417	0.0379	0.647196	no
XLOC_006952	XLOC_006952	Klf5	14:99298690-99313412	q1	q2	OK	1.84818	4.48303	1.27837	1.47666	0.03805	0.649039	no
XLOC_016267	XLOC_016267	BC049635	4:42868002-42874203	q1	q2	OK	1.29977	3.56439	1.4554	1.509	0.0381	0.649173	no
XLOC_000541	XLOC_000541	F5	1:164115263-164220274	q1	q2	OK	1.23632	0.519472	-1.25094	-1.48005	0.0383	0.64971	no
XLOC_003193	XLOC_003193	Cdk5r1	11:80477045-80481179	q1	q2	OK	50.11	91.5353	0.869231	1.48755	0.03825	0.64971	no
XLOC_001284	XLOC_001284	Rgs4	1:169741476-169747642	q1	q2	OK	92.5565	177.449	0.939	1.48876	0.03825	0.64971	no
XLOC_000032	XLOC_000032	Tfap2d	1:19103021-19166338	q1	q2	OK	0.271984	1.2148	2.15912	1.62255	0.0383	0.64971	no
XLOC_010250	XLOC_010250	LOC100862184	17:35263093-35282104	q1	q2	OK	99.8984	32.3829	-1.62523	-1.54083	0.0387	0.655774	no
XLOC_016694	XLOC_016694	Nkain1	4:130530130-130574036	q1	q2	OK	50.7006	28.9087	-0.810503	-1.46801	0.03875	0.6559	no
XLOC_007622	XLOC_007622	Cthrc1	15:39076931-39087119	q1	q2	OK	10.9772	4.83544	-1.18279	-1.51703	0.0389	0.656997	no
XLOC_002027	XLOC_002027	Pan2	10:128303334-128321358	q1	q2	OK	8.82467	4.96981	-0.828352	-1.46072	0.0389	0.656997	no
XLOC_022141	XLOC_022141	Cox8b	7:140898941-140900446	q1	q2	OK	7.61181	0.966648	-2.97718	-1.98413	0.0392	0.657026	no
XLOC_006693	XLOC_006693	Mat1a	14:41105380-41124412	q1	q2	OK	0.691304	0.131065	-2.39904	-1.73644	0.03915	0.657026	no
XLOC_011013	XLOC_011013	Mcc	18:44425059-44812182	q1	q2	OK	3.80865	2.05359	-0.891131	-1.44855	0.03915	0.657026	no
XLOC_005093	XLOC_005093	Klhl29	12:5077464-5375682	q1	q2	OK	6.10354	10.4895	0.781225	1.45467	0.0392	0.657026	no
XLOC_008143	XLOC_008143	Arc	15:74669082-74672570	q1	q2	OK	27.0579	49.4602	0.870222	1.4954	0.03915	0.657026	no
XLOC_023619	XLOC_023619	Arhgap32	9:32116135-32265511	q1	q2	OK	25.3074	47.8716	0.919611	1.45737	0.03915	0.657026	no
XLOC_018763	XLOC_018763	6430584L05	6:55396886-55412285	q1	q2	OK	0.694887	2.15976	1.63602	1.61618	0.03905	0.657026	no
XLOC_005384	XLOC_005384	Ccdc88c	12:100912699-101028983	q1	q2	OK	4.76464	8.44349	0.825472	1.4503	0.0393	0.657273	no
XLOC_024996	XLOC_024996	Sytl5	X:9885621-9994543	q1	q2	OK	0.731975	2.015	1.46092	1.52707	0.0393	0.657273	no
XLOC_004423	XLOC_004423	Cacng4	11:107734779-107795982	q1	q2	OK	11.8041	23.7773	1.0103	1.48448	0.03945	0.659067	no
XLOC_021928	XLOC_021928	St5	7:109523910-109617147	q1	q2	OK	8.75303	4.54412	-0.945781	-1.49643	0.03965	0.660976	no
XLOC_000998	XLOC_000998	Ecel1	1:87147654-87155027	q1	q2	OK	9.8046	17.8383	0.863448	1.43645	0.03965	0.660976	no
XLOC_004047	XLOC_004047	Sgsm2	11:74849263-74897080	q1	q2	OK	18.1837	31.6624	0.800129	1.4494	0.0397	0.661095	no
XLOC_007117	XLOC_007117	Cacna2d3	14:28904942-29721864	q1	q2	OK	24.3632	41.1015	0.754487	1.42682	0.04025	0.669531	no
XLOC_019723	XLOC_019723	Kcna1	6:126636462-126645801	q1	q2	OK	45.6868	24.7739	-0.882957	-1.45463	0.04035	0.670471	no
XLOC_014955	XLOC_014955	Gucy1b3	3:82032003-82074711	q1	q2	OK	46.2135	79.912	0.7901	1.41872	0.04045	0.671409	no
XLOC_002556	XLOC_002556	Dyrk2	10:118859348-118868903	q1	q2	OK	5.73369	11.1904	0.964723	1.44686	0.0405	0.671516	no
XLOC_003636	XLOC_003636	Kremen1	11:5191551-5261610	q1	q2	OK	4.85871	8.51753	0.80986	1.42298	0.04065	0.673279	no
XLOC_015422	XLOC_015422	Runx1t1	4:13743301-13893649	q1	q2	OK	3.93482	7.08077	0.847608	1.4685	0.0407	0.673384	no
XLOC_001993	XLOC_001993	Agap2	10:127078906-127093169	q1	q2	OK	115.266	253.481	1.13691	1.4546	0.04075	0.673489	no
XLOC_025133	XLOC_025133	2610018G03Rik	X:50841435-50891856	q1	q2	OK	2.02379	4.65903	1.20297	1.42624	0.04085	0.674419	no
XLOC_006878	XLOC_006878	Ebf2	14:67233291-67437171	q1	q2	OK	1.09317	0.355373	-1.62111	-1.54017	0.0409	0.674522	no
XLOC_022043	XLOC_022043	2014-09-01	7:127214441-127218445	q1	q2	OK	1.38133	0.365097	-1.91971	-1.56735	0.0412	0.675855	no
XLOC_016787	XLOC_016787	Nbl1	4:139082291-139092970	q1	q2	OK	33.7573	19.5933	-0.784838	-1.43032	0.04115	0.675855	no
XLOC_017994	XLOC_017994	Gabra4	5:71569733-71658308	q1	q2	OK	19.359	34.3248	0.826245	1.44162	0.04115	0.675855	no
XLOC_014749	XLOC_014749	AI606473	3:154330820-154334687	q1	q2	OK	0.165081	0.990551	2.58506	1.77837	0.04115	0.675855	no
XLOC_018603	XLOC_018603	Cpa4	6:30568375-30591747	q1	q2	OK	0.0709016	1.22171	4.10694	2.47604	0.0412	0.675855	no
XLOC_008859	XLOC_008859	Kcne2	16:92292388-92298133	q1	q2	OK	3.28515	1.07377	-1.61327	-1.57406	0.0413	0.676359	no
XLOC_020570	XLOC_020570	Arap1	7:101348068-101412586	q1	q2	OK	7.0481	3.77868	-0.899353	-1.44811	0.0414	0.676359	no
XLOC_000527	XLOC_000527	Ankrd45	1:161142711-161170507	q1	q2	OK	12.0439	20.8358	0.790764	1.41006	0.04145	0.676359	no
XLOC_020876	XLOC_020876	Pwwp2b	7:139248481-139267253	q1	q2	OK	5.48663	10.6173	0.95242	1.43471	0.0414	0.676359	no
XLOC_017232	XLOC_017232	Shisa3	5:67607882-67613987	q1	q2	OK	0.377425	1.12535	1.57611	1.50895	0.04145	0.676359	no
XLOC_003941	XLOC_003941	Ntn1	11:68209363-68386826	q1	q2	OK	8.05732	4.26319	-0.918366	-1.44873	0.0415	0.676459	no
XLOC_011486	XLOC_011486	Pax2	19:44757393-44837871	q1	q2	OK	2.39023	0.0472207	-5.66159	-3.5492	0.04155	0.676559	no
XLOC_020199	XLOC_020199	Cox7a1	7:30184170-30186030	q1	q2	OK	15.9106	4.56302	-1.80192	-1.5635	0.0416	0.676658	no
XLOC_021862	XLOC_021862	Hpx	7:105591610-105600116	q1	q2	OK	2.09078	0.595095	-1.81285	-1.52649	0.04185	0.678577	no
XLOC_009489	XLOC_009489	Fbxl16	17:25809084-25821265	q1	q2	OK	182.581	374.122	1.03497	1.42505	0.04185	0.678577	no
XLOC_011786	XLOC_011786	Gda	19:21391306-21472661	q1	q2	OK	31.3745	65.7439	1.06726	1.51148	0.0418	0.678577	no
XLOC_012239	XLOC_012239	C130021I20Rik	2:33641192-33645663	q1	q2	OK	0.937827	0.0369503	-4.66566	-2.86572	0.042	0.678641	no
XLOC_016950	XLOC_016950	Isg15	4:156199423-156200818	q1	q2	OK	6.52581	2.33921	-1.48014	-1.45141	0.0421	0.678641	no
XLOC_004357	XLOC_004357	Mpp2	11:102057016-102088515	q1	q2	OK	28.3935	48.5571	0.774119	1.40546	0.0421	0.678641	no
XLOC_008309	XLOC_008309	Scube1	15:83602582-83725021	q1	q2	OK	3.95212	7.18701	0.862764	1.41817	0.04225	0.678641	no
XLOC_013667	XLOC_013667	Rcn1	2:105385947-105399319	q1	q2	OK	7.96244	14.5908	0.873777	1.43708	0.0421	0.678641	no
XLOC_005250	XLOC_005250	Nin	12:70011434-70113240	q1	q2	OK	4.54579	8.35536	0.878169	1.43757	0.0422	0.678641	no
XLOC_013450	XLOC_013450	Rtn4rl2	2:84871945-84886692	q1	q2	OK	9.98658	20.7189	1.05288	1.46075	0.04225	0.678641	no
XLOC_007398	XLOC_007398	Ptk2b	14:66153256-66281052	q1	q2	OK	73.7334	154.529	1.06749	1.44951	0.04225	0.678641	no
XLOC_014739	XLOC_014739	Gm1653	3:149274736-149279980	q1	q2	OK	0.211817	0.801696	1.92024	1.58046	0.04215	0.678641	no
XLOC_006209	XLOC_006209	Msx2	13:53466880-53472780	q1	q2	OK	1.29258	0.372891	-1.79343	-1.54953	0.0423	0.678737	no
XLOC_007409	XLOC_007409	Dock5	14:67751927-67933572	q1	q2	OK	3.0094	1.64273	-0.873378	-1.42168	0.04235	0.678833	no
XLOC_007858	XLOC_007858	Shank3	15:89499856-89560261	q1	q2	OK	27.7212	47.4041	0.774022	1.40725	0.04265	0.682223	no
XLOC_010594	XLOC_010594	Dsg1c	18:20247339-20283923	q1	q2	OK	0.0583024	0.851064	3.86764	2.50106	0.04265	0.682223	no
XLOC_005917	XLOC_005917	AI197445	13:107469821-107479188	q1	q2	OK	0.244061	0.929462	1.92915	1.59169	0.04285	0.684712	no
XLOC_019366	XLOC_019366	Gimap3	6:48764463-48770851	q1	q2	OK	1.06234	0.0910362	-3.54466	-2.254	0.04295	0.685421	no
XLOC_000434	XLOC_000434	Chi3l1	1:134182403-134190031	q1	q2	OK	7.41789	3.41079	-1.1209	-1.46565	0.04325	0.685421	no
XLOC_006828	XLOC_006828	Fgf9	14:58072685-58112720	q1	q2	OK	7.72767	4.18358	-0.885295	-1.45269	0.0432	0.685421	no
XLOC_006631	XLOC_006631	Erc2	14:27622441-28478537	q1	q2	OK	17.6617	31.1005	0.816313	1.40718	0.04325	0.685421	no
XLOC_008896	XLOC_008896	Coro7	16:4626883-4679720	q1	q2	OK	18.8756	33.3863	0.822728	1.43677	0.04325	0.685421	no
XLOC_004943	XLOC_004943	Gm19554	12:105899840-105902150	q1	q2	OK	0.522404	1.49713	1.51897	1.4638	0.04315	0.685421	no
XLOC_017795	XLOC_017795	Mir5109	5:17776748-17776835	q1	q2	OK	0	50.0365	inf	#NAME?	0.0432	0.685421	no
XLOC_022283	XLOC_022283	Defb6	8:19225477-19228209	q1	q2	OK	0	0.728144	inf	#NAME?	0.0432	0.685421	no
XLOC_011640	XLOC_011640	Neat1	19:5814394-5845478	q1	q2	OK	78.4703	45.9281	-0.77277	-1.41195	0.04365	0.69105	no
XLOC_014374	XLOC_014374	Mef2d	3:88142394-88169167	q1	q2	OK	30.3812	50.9538	0.746012	1.42201	0.04375	0.691214	no
XLOC_011804	XLOC_011804	Glis3	19:28262447-28720027	q1	q2	OK	0.398472	1.07325	1.42943	1.45172	0.04375	0.691214	no
XLOC_023995	XLOC_023995	Mrap2	9:87144305-87184045	q1	q2	OK	10.5878	5.25238	-1.01136	-1.44416	0.04385	0.692085	no
XLOC_024257	XLOC_024257	Cntn5	9:9660890-10904775	q1	q2	OK	0.900382	2.15538	1.25933	1.47687	0.0444	0.700049	no
XLOC_017089	XLOC_017089	Kcnk3	5:30573986-30625270	q1	q2	OK	17.8807	8.6489	-1.04781	-1.50467	0.04445	0.700122	no
XLOC_000518	XLOC_000518	Tnr	1:159523768-159924922	q1	q2	OK	8.76685	14.8029	0.755746	1.42111	0.0448	0.704914	no
XLOC_023150	XLOC_023150	Mast3	8:70778116-70792433	q1	q2	OK	32.0387	57.3661	0.840385	1.41699	0.04485	0.704982	no
XLOC_015519	XLOC_015519	Car9	4:43505656-43513725	q1	q2	OK	2.04168	0.586391	-1.79982	-1.5188	0.0452	0.705516	no
XLOC_004484	XLOC_004484	Unc13d	11:116062095-116077961	q1	q2	OK	0.829037	0.283521	-1.54798	-1.4283	0.04515	0.705516	no
XLOC_008337	XLOC_008337	Mapk12	15:89130583-89140703	q1	q2	OK	10.2869	5.24028	-0.973098	-1.38046	0.0452	0.705516	no
XLOC_000708	XLOC_000708	Plxna2	1:194619828-194816869	q1	q2	OK	10.5524	17.7905	0.753538	1.39928	0.04525	0.705516	no
XLOC_015369	XLOC_015369	St6galnac5	3:152820708-152982207	q1	q2	OK	15.5225	28.421	0.872598	1.39421	0.04525	0.705516	no
XLOC_020988	XLOC_020988	Syt5	7:4539764-4546567	q1	q2	OK	60.0804	111.346	0.890082	1.42905	0.045	0.705516	no
XLOC_013723	XLOC_013723	2700033N17Rik	2:116066215-116067444	q1	q2	OK	2.10853	6.4129	1.60474	1.46419	0.0451	0.705516	no
XLOC_023398	XLOC_023398	Slc38a8	8:119479601-119501698	q1	q2	OK	0.15869	0.841831	2.40732	1.73955	0.04505	0.705516	no
XLOC_013613	XLOC_013613	Nr1h3	2:91184060-91195116	q1	q2	OK	3.38103	1.25696	-1.42752	-1.49701	0.0453	0.705582	no
XLOC_018214	XLOC_018214	Gltp	5:114669489-114690935	q1	q2	OK	44.1138	25.2684	-0.803899	-1.43734	0.0454	0.706426	no
XLOC_013454	XLOC_013454	Lrrc55	2:85188070-85196699	q1	q2	OK	6.04338	11.2087	0.891187	1.41025	0.0456	0.708823	no
XLOC_017126	XLOC_017126	Slc5a1	5:33104218-33162699	q1	q2	OK	1.19268	0.0581836	-4.35745	-2.54963	0.04565	0.708885	no
XLOC_024752	XLOC_024752	Mras	9:99385419-99436712	q1	q2	OK	36.2397	62.3845	0.783617	1.41286	0.0459	0.71205	no
XLOC_017033	XLOC_017033	Pion	5:21186266-21291701	q1	q2	OK	3.22473	1.51192	-1.0928	-1.43121	0.04615	0.712345	no
XLOC_009895	XLOC_009895	Tmem178	17:80944631-81001816	q1	q2	OK	48.1083	27.733	-0.79468	-1.42146	0.04605	0.712345	no
XLOC_002851	XLOC_002851	Tbc1d9b	11:50131359-50172785	q1	q2	OK	48.2219	82.7292	0.778709	1.3811	0.0461	0.712345	no
XLOC_001780	XLOC_001780	Reep6	10:80330144-80336441	q1	q2	OK	4.76021	9.14551	0.942038	1.40037	0.04615	0.712345	no
XLOC_021985	XLOC_021985	Crym	7:120186383-120201988	q1	q2	OK	44.4683	86.5945	0.9615	1.46095	0.046	0.712345	no
XLOC_002824	XLOC_002824	Ifi47,Olfr56	11:49037659-49135387	q1	q2	OK	2.74735	0.736346	-1.89958	-1.3833	0.0465	0.716314	no
XLOC_000910	XLOC_000910	Myl1	1:66924294-66945056	q1	q2	OK	0.397618	1.66902	2.06955	1.56172	0.0465	0.716314	no
XLOC_010369	XLOC_010369	Gnmt	17:46725663-46729165	q1	q2	OK	2.4612	0.192732	-3.6747	-2.30798	0.04685	0.718223	no
XLOC_006723	XLOC_006723	Lgals3	14:47373859-47386167	q1	q2	OK	1.65413	0.506907	-1.70628	-1.38472	0.04695	0.718223	no
XLOC_012887	XLOC_012887	Acss2	2:155518042-155562743	q1	q2	OK	28.4918	16.7639	-0.765186	-1.40159	0.0467	0.718223	no
XLOC_023104	XLOC_023104	Klhl2	8:64739861-64793152	q1	q2	OK	46.7141	79.6305	0.769463	1.40911	0.0469	0.718223	no
XLOC_019656	XLOC_019656	Cacna1c	6:118592295-119221614	q1	q2	OK	6.21603	11.5379	0.89232	1.46092	0.04675	0.718223	no
XLOC_018313	XLOC_018313	Tmem132d	5:127783490-128433077	q1	q2	OK	3.27814	6.31362	0.945589	1.44594	0.0468	0.718223	no
XLOC_020751	XLOC_020751	Vwa3a	7:120739556-120805541	q1	q2	OK	1.26378	2.94809	1.22204	1.49287	0.04695	0.718223	no
XLOC_015164	XLOC_015164	Ptgfrn	3:101040235-101110166	q1	q2	OK	5.25261	9.0179	0.779757	1.40537	0.0472	0.721332	no
XLOC_004682	XLOC_004682	Sostdc1	12:36314168-36318452	q1	q2	OK	3.71611	1.26264	-1.55735	-1.51294	0.0475	0.725198	no
XLOC_015088	XLOC_015088	Tuft1	3:94612758-94658806	q1	q2	OK	2.46587	1.01838	-1.27581	-1.42092	0.04765	0.725379	no
XLOC_023309	XLOC_023309	Tradd	8:105258574-105264594	q1	q2	OK	4.95404	2.15319	-1.20213	-1.3536	0.0477	0.725379	no
XLOC_000282	XLOC_000282	Efhd1	1:87264363-87310791	q1	q2	OK	26.7291	15.0367	-0.829929	-1.39974	0.04765	0.725379	no
XLOC_002752	XLOC_002752	Bcl11a	11:24078055-24173558	q1	q2	OK	15.4066	31.4572	1.02984	1.34441	0.0477	0.725379	no
XLOC_002409	XLOC_002409	Celf5	10:81459227-81482709	q1	q2	OK	34.3139	64.1683	0.903065	1.43789	0.04775	0.725424	no
XLOC_024219	XLOC_024219	Snrk	9:122117265-122169702	q1	q2	OK	45.9338	25.3606	-0.856967	-1.40971	0.04785	0.726227	no
XLOC_010865	XLOC_010865	Zfp516	18:82910878-83005314	q1	q2	OK	2.59735	4.65372	0.841344	1.43569	0.04795	0.726315	no
XLOC_021632	XLOC_021632	Rhcg	7:79593362-79617657	q1	q2	OK	0.229425	1.00839	2.13596	1.59864	0.04795	0.726315	no
XLOC_000022	XLOC_000022	Kcnb2	1:15312451-15714214	q1	q2	OK	1.30323	2.63251	1.01435	1.41687	0.0481	0.727872	no
XLOC_021620	XLOC_021620	Slco3a1	7:74275417-74554780	q1	q2	OK	18.8841	10.8425	-0.800478	-1.39558	0.04815	0.727915	no
XLOC_008354	XLOC_008354	Abcd2	15:91145870-91191807	q1	q2	OK	13.2142	7.7859	-0.763154	-1.40648	0.0483	0.728041	no
XLOC_018855	XLOC_018855	1700003E16Rik	6:83156403-83162975	q1	q2	OK	7.26322	13.8789	0.934213	1.4346	0.04825	0.728041	no
XLOC_008244	XLOC_008244	Baiap2l2	15:79258194-79285509	q1	q2	OK	0.503482	1.58184	1.65159	1.50285	0.0483	0.728041	no
XLOC_010908	XLOC_010908	Chst9	18:15452174-15718046	q1	q2	OK	1.02903	0.168729	-2.60851	-1.71946	0.04855	0.731095	no
XLOC_014147	XLOC_014147	Zbtb46	2:181390885-181459426	q1	q2	OK	7.57419	3.55902	-1.08961	-1.4362	0.0489	0.732076	no
XLOC_010766	XLOC_010766	Slc12a2	18:57878677-57958106	q1	q2	OK	25.5102	14.4589	-0.81912	-1.37821	0.0489	0.732076	no
XLOC_021522	XLOC_021522	Abcc8	7:46104522-46180033	q1	q2	OK	9.47965	5.43104	-0.803606	-1.39914	0.0489	0.732076	no
XLOC_012116	XLOC_012116	Nrarp	2:25180757-25183339	q1	q2	OK	7.12905	12.7393	0.837503	1.34713	0.04885	0.732076	no
XLOC_019665	XLOC_019665	Cecr6	6:120488938-120493807	q1	q2	OK	8.38828	15.0107	0.839541	1.37824	0.0489	0.732076	no
XLOC_000074	XLOC_000074	Zap70	1:36761860-36782816	q1	q2	OK	0.837808	2.44081	1.54267	1.49289	0.04875	0.732076	no
XLOC_013837	XLOC_013837	Prosapip1	2:130632838-130642803	q1	q2	OK	42.6883	72.4139	0.762424	1.36038	0.0491	0.734357	no
XLOC_001656	XLOC_001656	Atoh7	10:63100155-63100605	q1	q2	OK	5.72111	0.885733	-2.69135	-1.77995	0.04945	0.734639	no
XLOC_022009	XLOC_022009	Lat	7:126363826-126369534	q1	q2	OK	0.987694	0.196893	-2.32665	-1.5969	0.0494	0.734639	no
XLOC_015800	XLOC_015800	Slc6a9	4:117835257-117872470	q1	q2	OK	40.6501	23.1372	-0.813044	-1.3943	0.0494	0.734639	no
XLOC_000957	XLOC_000957	Epha4	1:77367184-77515088	q1	q2	OK	16.7889	29.8628	0.830837	1.39378	0.0493	0.734639	no
XLOC_016672	XLOC_016672	S100pbp	4:129150824-129189482	q1	q2	OK	9.02462	16.5806	0.877553	1.37627	0.0495	0.734639	no
XLOC_009201	XLOC_009201	Htr1f	16:64924728-65105784	q1	q2	OK	0.44245	1.34465	1.60364	1.47278	0.0495	0.734639	no
XLOC_012360	XLOC_012360	Dlx1	2:71529444-71537891	q1	q2	OK	2.7995	8.97504	1.68075	1.50276	0.04925	0.734639	no
XLOC_012720	XLOC_012720	Tgm3	2:130012373-130050399	q1	q2	OK	0.319108	1.19566	1.90569	1.61601	0.0495	0.734639	no
XLOC_014568	XLOC_014568	Slc16a1	3:104638667-104658462	q1	q2	OK	15.7367	9.34731	-0.751507	-1.38236	0.0497	0.736898	no
XLOC_009013	XLOC_009013	Igf2bp2	16:22059008-22163299	q1	q2	OK	0.307682	0.839349	1.44783	1.40387	0.05	0.740634	no
XLOC_004178	XLOC_004178	Pctp	11:89983416-90002894	q1	q2	OK	1.89423	0.695589	-1.4453	-1.39355	0.05015	0.740808	no
XLOC_021836	XLOC_021836	Trim30a	7:104409024-104465193	q1	q2	OK	1.40381	0.539173	-1.38053	-1.38967	0.0503	0.740808	no
XLOC_016822	XLOC_016822	Tmem51	4:142030992-142088101	q1	q2	OK	6.23442	2.9119	-1.0983	-1.39182	0.0502	0.740808	no
XLOC_010992	XLOC_010992	Fgf1	18:38838672-38971274	q1	q2	OK	40.8685	23.4739	-0.79993	-1.37565	0.0502	0.740808	no
XLOC_021290	XLOC_021290	Map3k10	7:27656376-27674598	q1	q2	OK	44.0201	75.1242	0.771116	1.41862	0.05025	0.740808	no
XLOC_009143	XLOC_009143	Alcam	16:52248995-52452997	q1	q2	OK	26.4333	45.4466	0.781815	1.40128	0.0503	0.740808	no
XLOC_019987	XLOC_019987	Gng8	7:16891785-16895435	q1	q2	OK	2.67766	0.756643	-1.82329	-1.51033	0.0504	0.740866	no
XLOC_000546	XLOC_000546	LOC433374	1:164863120-164871438	q1	q2	OK	1.81397	0.637592	-1.50844	-1.35734	0.0504	0.740866	no
XLOC_004921	XLOC_004921	Serpina3g	12:104236241-104241934	q1	q2	OK	1.23307	0.347519	-1.82709	-1.51899	0.05045	0.740894	no
XLOC_000657	XLOC_000657	Cnih3	1:181352627-181460641	q1	q2	OK	18.1446	33.0974	0.86718	1.39976	0.0505	0.740923	no
XLOC_025939	XLOC_025939	Il2rg	X:101264386-101268224	q1	q2	OK	1.94143	0.657526	-1.562	-1.44392	0.0508	0.74115	no
XLOC_007909	XLOC_007909	Gpd1	15:99717592-99725008	q1	q2	OK	55.4386	33.1832	-0.740436	-1.35921	0.0506	0.74115	no
XLOC_007433	XLOC_007433	Bmp1	14:70474554-70520260	q1	q2	OK	26.1322	15.6926	-0.73574	-1.34085	0.0508	0.74115	no
XLOC_018880	XLOC_018880	Tgfa	6:86195250-86275449	q1	q2	OK	10.5298	17.7659	0.754641	1.3996	0.05075	0.74115	no
XLOC_004654	XLOC_004654	Myt1l	12:29526958-29923209	q1	q2	OK	25.533	43.6343	0.773101	1.3775	0.0509	0.74115	no
XLOC_017821	XLOC_017821	Fam126a	5:23960930-24030683	q1	q2	OK	4.00868	7.01307	0.806916	1.37142	0.0509	0.74115	no
XLOC_012756	XLOC_012756	Plcb1	2:134786163-135475258	q1	q2	OK	23.7636	42.5404	0.840079	1.39544	0.0509	0.74115	no
XLOC_006302	XLOC_006302	Cntnap3	13:64737590-64903888	q1	q2	OK	1.2451	2.71644	1.12546	1.40373	0.0509	0.74115	no
XLOC_019592	XLOC_019592	Gm765	6:98238013-98342754	q1	q2	OK	0.892429	3.00852	1.75324	1.4588	0.05105	0.742633	no
XLOC_022392	XLOC_022392	6430573F11Rik	8:36489190-36513013	q1	q2	OK	11.8939	6.18508	-0.943354	-1.37833	0.0514	0.74702	no
XLOC_008166	XLOC_008166	Mafa	15:75746842-75747922	q1	q2	OK	1.43156	0.36441	-1.97396	-1.47268	0.0515	0.747768	no
XLOC_000555	XLOC_000555	Ildr2	1:166254138-166316832	q1	q2	OK	14.3004	25.0235	0.807232	1.37663	0.05155	0.74779	no
XLOC_018755	XLOC_018755	Wipf3	6:54452882-54503768	q1	q2	OK	28.6695	52.3767	0.869406	1.37913	0.05185	0.751435	no
XLOC_018958	XLOC_018958	Lrrn1	6:107529725-107570228	q1	q2	OK	32.7015	19.383	-0.754562	-1.36581	0.05195	0.752177	no
XLOC_023874	XLOC_023874	Itga11	9:62677854-62783979	q1	q2	OK	0.366732	0.937908	1.35472	1.4295	0.05215	0.754365	no
XLOC_006164	XLOC_006164	A330076C08Rik	13:44193588-44216487	q1	q2	OK	1.48414	0.503776	-1.55877	-1.40967	0.05225	0.755103	no
XLOC_011550	XLOC_011550	Adrb1	19:56722371-56724862	q1	q2	OK	5.7989	10.6859	0.881853	1.32888	0.0525	0.758006	no
XLOC_016991	XLOC_016991	Akap9	5:3928185-4080204	q1	q2	OK	9.9591	16.6652	0.742748	1.38364	0.05285	0.761633	no
XLOC_009193	XLOC_009193	Epha6	16:59613320-60605531	q1	q2	OK	3.18253	7.07724	1.15301	1.40807	0.05285	0.761633	no
XLOC_019016	XLOC_019016	Rasgef1a	6:118066384-118091546	q1	q2	OK	59.9797	106.182	0.823987	1.36398	0.0529	0.761641	no
XLOC_014131	XLOC_014131	B230312C02Rik	2:180370857-180401802	q1	q2	OK	1.05202	0.158802	-2.72787	-1.71926	0.053	0.762369	no
XLOC_004177	XLOC_004177	Ankfn1	11:89421085-89540720	q1	q2	OK	0.556663	1.54834	1.47585	1.44394	0.05305	0.762377	no
XLOC_021061	XLOC_021061	Zik1	7:10487223-10495381	q1	q2	OK	3.67967	6.50405	0.821763	1.32925	0.05315	0.763103	no
XLOC_010429	XLOC_010429	Gm20219	17:56551416-56554387	q1	q2	OK	2.62496	0.968556	-1.43839	-1.3931	0.05325	0.763828	no
XLOC_004208	XLOC_004208	Itga3	11:95044481-95076714	q1	q2	OK	9.3595	5.42116	-0.78783	-1.34676	0.0533	0.763835	no
XLOC_018948	XLOC_018948	Gpr27	6:99692678-99693818	q1	q2	OK	8.82091	17.5171	0.989763	1.4043	0.05345	0.764563	no
XLOC_004670	XLOC_004670	Efcab10	12:33394853-33401269	q1	q2	OK	1.15305	3.8046	1.72229	1.40708	0.05345	0.764563	no
XLOC_018104	XLOC_018104	Rasgef1b	5:99217419-99252927	q1	q2	OK	15.8849	26.3957	0.732649	1.34447	0.05365	0.766003	no
XLOC_018558	XLOC_018558	Met	6:17463956-17573980	q1	q2	OK	1.09803	2.21753	1.01404	1.35438	0.05365	0.766003	no
XLOC_025784	XLOC_025784	Mcf2	X:60055955-60147643	q1	q2	OK	3.05139	1.44258	-1.08081	-1.38476	0.0541	0.771713	no
XLOC_022033	XLOC_022033	Mvp	7:126986859-127014594	q1	q2	OK	6.28663	3.16776	-0.988825	-1.39777	0.0543	0.77385	no
XLOC_012504	XLOC_012504	Agbl2	2:90782743-90816231	q1	q2	OK	1.77746	0.704962	-1.3342	-1.38804	0.05445	0.775268	no
XLOC_009567	XLOC_009567	Cyp4f16	17:32536628-32551797	q1	q2	OK	3.46808	1.54267	-1.1687	-1.35745	0.0545	0.775268	no
XLOC_009343	XLOC_009343	Airn	17:12648873-12868143	q1	q2	OK	7.35484	0.506692	-3.85951	-0.672192	0.05485	0.777378	no
XLOC_012516	XLOC_012516	Pacsin3	2:91256812-91264679	q1	q2	OK	24.0513	14.2717	-0.75296	-1.31815	0.0548	0.777378	no
XLOC_012160	XLOC_012160	Adamtsl2	2:27079380-27108613	q1	q2	OK	1.29465	2.68153	1.0505	1.30358	0.0548	0.777378	no
XLOC_001531	XLOC_001531	Samd3	10:26229706-26272172	q1	q2	OK	0.942571	2.55872	1.44075	1.38845	0.05475	0.777378	no
XLOC_019786	XLOC_019786	Csda	6:131364857-131388450	q1	q2	OK	22.3616	12.7085	-0.815232	-1.35967	0.05495	0.77808	no
XLOC_006387	XLOC_006387	A830009L08Rik	13:91368989-91388085	q1	q2	OK	0.370222	1.29108	1.80212	1.53429	0.05505	0.778781	no
XLOC_015523	XLOC_015523	Tmem8b	4:43668970-43692668	q1	q2	OK	16.4715	27.7584	0.752947	1.37488	0.0552	0.780187	no
XLOC_004516	XLOC_004516	Lgals3bp	11:118392751-118419052	q1	q2	OK	17.2364	5.69482	-1.59774	-1.41699	0.05565	0.785108	no
XLOC_007582	XLOC_007582	Cdh18	15:23036462-23474418	q1	q2	OK	12.5455	6.89843	-0.862827	-1.38713	0.05565	0.785108	no
XLOC_009638	XLOC_009638	Ly6g6e	17:35076941-35078804	q1	q2	OK	1.63431	4.2736	1.38677	1.38552	0.05575	0.7858	no
XLOC_003568	XLOC_003568	Rnf213	11:119393099-119487425	q1	q2	OK	1.70927	0.957872	-0.835476	-1.36036	0.05585	0.78649	no
XLOC_004464	XLOC_004464	Fads6	11:115283365-115297546	q1	q2	OK	15.5381	8.01164	-0.955639	-1.31165	0.0563	0.788491	no
XLOC_016765	XLOC_016765	Ephb2	4:136653607-136835935	q1	q2	OK	6.39376	3.55645	-0.846226	-1.35053	0.0561	0.788491	no
XLOC_014470	XLOC_014470	Them4	3:94310131-94332532	q1	q2	OK	19.488	10.9601	-0.83033	-1.3637	0.05605	0.788491	no
XLOC_019705	XLOC_019705	Leprel2	6:124841094-124857687	q1	q2	OK	11.5032	6.51514	-0.820165	-1.35816	0.05625	0.788491	no
XLOC_014575	XLOC_014575	6530418L21Rik	3:105704598-105720842	q1	q2	OK	13.7834	23.2973	0.757232	1.34514	0.05625	0.788491	no
XLOC_001170	XLOC_001170	Rgs2	1:143999337-144016831	q1	q2	OK	13.0386	23.0458	0.821716	1.33216	0.05635	0.788491	no
XLOC_008731	XLOC_008731	Drd3	16:43762241-43822839	q1	q2	OK	0.214818	1.16147	2.43476	1.57808	0.05625	0.788491	no
XLOC_002886	XLOC_002886	Irf1	11:53770013-53778374	q1	q2	OK	5.02749	2.35401	-1.09472	-1.38915	0.05645	0.789174	no
XLOC_010271	XLOC_010271	H2-Bl	17:36080188-36084249	q1	q2	OK	1.42783	0.287514	-2.31212	-1.64797	0.05655	0.789822	no
XLOC_013380	XLOC_013380	Stk39	2:68210446-68471981	q1	q2	OK	31.8426	19.4319	-0.712532	-1.33391	0.0566	0.789822	no
XLOC_002472	XLOC_002472	Gm872	10:92796752-92836346	q1	q2	OK	0.441295	1.31313	1.57319	1.42017	0.05665	0.789822	no
XLOC_013903	XLOC_013903	3300002I08Rik	2:150310936-150362765	q1	q2	OK	0.68294	2.72607	1.99699	1.52697	0.0568	0.791198	no
XLOC_023783	XLOC_023783	Tmprss5	9:49102778-49117587	q1	q2	OK	2.05857	0.709402	-1.53697	-1.44319	0.0569	0.791875	no
XLOC_002543	XLOC_002543	Lyz1	10:117287794-117292868	q1	q2	OK	2.21712	0.784242	-1.49932	-1.3655	0.0571	0.79295	no
XLOC_020170	XLOC_020170	Fbxo17	7:28716789-28738144	q1	q2	OK	1.94408	0.74608	-1.38169	-1.35065	0.0575	0.79295	no
XLOC_017530	XLOC_017530	A930024E05Rik	5:122989353-122998345	q1	q2	OK	2.52469	0.996371	-1.34135	-1.38426	0.05775	0.79295	no
XLOC_002484	XLOC_002484	4932415G12Rik	10:94673492-94688613	q1	q2	OK	8.03055	4.63986	-0.791416	-1.33884	0.0572	0.79295	no
XLOC_005953	XLOC_005953	Hcn1	13:117602319-117981028	q1	q2	OK	12.4608	7.3318	-0.765154	-1.36035	0.0574	0.79295	no
XLOC_013041	XLOC_013041	Gm14420	2:177464741-177479194	q1	q2	OK	12.3111	7.32958	-0.748156	-1.36384	0.0578	0.79295	no
XLOC_001008	XLOC_001008	Arl4c	1:88698224-88702191	q1	q2	OK	25.1824	15.2537	-0.723258	-1.33198	0.0575	0.79295	no
XLOC_000761	XLOC_000761	Rims1	1:22468190-22805724	q1	q2	OK	21.3418	35.5967	0.738059	1.34278	0.0577	0.79295	no
XLOC_022949	XLOC_022949	Csmd1	8:15892544-17535385	q1	q2	OK	3.63761	6.20467	0.770364	1.31651	0.05735	0.79295	no
XLOC_019908	XLOC_019908	Ccdc106	7:5056725-5060785	q1	q2	OK	14.4681	24.915	0.784137	1.36693	0.0578	0.79295	no
XLOC_014139	XLOC_014139	Kcnq2	2:181075578-181135225	q1	q2	OK	48.5805	84.8893	0.805205	1.45865	0.05775	0.79295	no
XLOC_010811	XLOC_010811	Gnal	18:67088335-67245830	q1	q2	OK	46.5435	85.8582	0.883375	1.35524	0.05745	0.79295	no
XLOC_015563	XLOC_015563	E130309F12Rik	4:49059461-49340261	q1	q2	OK	3.89086	7.24736	0.897368	1.37763	0.0575	0.79295	no
XLOC_009802	XLOC_009802	St6gal2	17:55445716-55499226	q1	q2	OK	2.09717	4.66223	1.15257	1.39027	0.05715	0.79295	no
XLOC_019248	XLOC_019248	Wnt2	6:17988939-18030445	q1	q2	OK	0.893933	2.45415	1.45699	1.33506	0.05715	0.79295	no
XLOC_019837	XLOC_019837	Plcz1	6:139989721-140041417	q1	q2	OK	0.350058	1.20193	1.77968	1.42301	0.0576	0.79295	no
XLOC_022411	XLOC_022411	Fat1	8:44950207-45052257	q1	q2	OK	11.3001	6.32734	-0.83666	-1.35378	0.0581	0.793536	no
XLOC_007925	XLOC_007925	Acvr1b	15:101174124-101212601	q1	q2	OK	26.1753	42.7905	0.709084	1.33573	0.05795	0.793536	no
XLOC_012707	XLOC_012707	Mertk	2:128698996-128802187	q1	q2	OK	6.97098	11.7234	0.749961	1.30563	0.0581	0.793536	no
XLOC_007484	XLOC_007484	Dach1	14:97786846-98169543	q1	q2	OK	4.13497	7.16177	0.792438	1.32203	0.05795	0.793536	no
XLOC_025899	XLOC_025899	Il1rapl1	X:86747241-88115623	q1	q2	OK	1.40404	3.08404	1.13523	1.34116	0.05805	0.793536	no
XLOC_010269	XLOC_010269	H2-T22	17:36038408-36042702	q1	q2	OK	12.7617	7.06667	-0.852722	-1.3108	0.0585	0.796134	no
XLOC_010850	XLOC_010850	St8sia5	18:77185846-77255450	q1	q2	OK	36.8266	21.4578	-0.77925	-1.32555	0.0584	0.796134	no
XLOC_014710	XLOC_014710	Unc5c	3:141465563-141834922	q1	q2	OK	7.61172	4.57054	-0.735859	-1.33163	0.0586	0.796134	no
XLOC_001431	XLOC_001431	Sertad4	1:192844487-192856487	q1	q2	OK	5.98185	10.5073	0.81273	1.34874	0.05855	0.796134	no
XLOC_011514	XLOC_011514	As3mt	19:46707442-46741095	q1	q2	OK	7.97908	14.485	0.860269	1.34508	0.05845	0.796134	no
XLOC_016849	XLOC_016849	Tnfrsf8	4:145268975-145315147	q1	q2	OK	0.367524	1.52592	2.05377	1.54198	0.05835	0.796134	no
XLOC_005498	XLOC_005498	Idi1	13:8885605-8892396	q1	q2	OK	32.2516	19.7681	-0.706195	-1.31935	0.05885	0.798124	no
XLOC_009522	XLOC_009522	Scube3	17:28142525-28171345	q1	q2	OK	1.20169	2.71378	1.17523	1.38369	0.05885	0.798124	no
XLOC_010755	XLOC_010755	9330117O12	18:54611743-54639870	q1	q2	OK	2.05684	0.806174	-1.35127	-1.31541	0.0592	0.798632	no
XLOC_018393	XLOC_018393	Gjc3	5:137953808-137962959	q1	q2	OK	31.1426	18.6176	-0.742221	-1.35411	0.05895	0.798632	no
XLOC_012326	XLOC_012326	Tbr1	2:61804452-61814114	q1	q2	OK	11.8089	21.9195	0.892333	1.35809	0.05925	0.798632	no
XLOC_023996	XLOC_023996	Nt5e	9:88327608-88372089	q1	q2	OK	2.20512	4.33173	0.974086	1.35933	0.05925	0.798632	no
XLOC_009570	XLOC_009570	Cyp4f15	17:32685658-32703349	q1	q2	OK	4.63442	9.17203	0.984851	1.33665	0.0592	0.798632	no
XLOC_008951	XLOC_008951	Spag6	16:16753015-16829363	q1	q2	OK	1.71184	3.78294	1.14396	1.36487	0.0592	0.798632	no
XLOC_025374	XLOC_025374	Dach2	X:113298255-113836386	q1	q2	OK	0.431665	1.16806	1.43612	1.35494	0.0591	0.798632	no
XLOC_023330	XLOC_023330	Lcat	8:105939550-105943402	q1	q2	OK	32.6923	18.8103	-0.797434	-1.33717	0.0594	0.799955	no
XLOC_024101	XLOC_024101	Uba7	9:107975566-107984056	q1	q2	OK	2.00803	0.789959	-1.34593	-1.41259	0.0599	0.801091	no
XLOC_004442	XLOC_004442	2610035D17Rik	11:113043905-113201838	q1	q2	OK	8.39053	4.33271	-0.953494	-1.33047	0.05985	0.801091	no
XLOC_002693	XLOC_002693	Zmat5	11:4704677-4737666	q1	q2	OK	41.1266	23.5827	-0.802347	-1.28144	0.0597	0.801091	no
XLOC_015574	XLOC_015574	Slc44a1	4:53440412-53622478	q1	q2	OK	42.3751	24.8753	-0.768502	-1.32208	0.05965	0.801091	no
XLOC_010363	XLOC_010363	Srf	17:46546838-46556162	q1	q2	OK	10.9337	18.1144	0.728358	1.33811	0.05985	0.801091	no
XLOC_024064	XLOC_024064	Pik3r4	9:105642994-105687655	q1	q2	OK	7.3788	12.6409	0.776642	1.33689	0.0597	0.801091	no
XLOC_002848	XLOC_002848	Rasgef1c	11:49901834-49980223	q1	q2	OK	8.63418	15.8412	0.875554	1.36432	0.0596	0.801091	no
XLOC_014268	XLOC_014268	Trpc4	3:54156056-54318471	q1	q2	OK	3.4515	6.75656	0.969065	1.35322	0.05985	0.801091	no
XLOC_020770	XLOC_020770	Slc5a11	7:123214865-123273251	q1	q2	OK	0.925829	0.215106	-2.1057	-1.563	0.0601	0.802374	no
XLOC_021361	XLOC_021361	Mag	7:30899182-30914832	q1	q2	OK	139.635	82.5773	-0.757839	-1.29142	0.06005	0.802374	no
XLOC_012654	XLOC_012654	Tmem62	2:120977061-121007843	q1	q2	OK	15.8185	9.29695	-0.766781	-1.32668	0.0603	0.802959	no
XLOC_021602	XLOC_021602	Mef2a	7:67233823-67372858	q1	q2	OK	22.1226	36.061	0.704915	1.32119	0.0602	0.802959	no
XLOC_015897	XLOC_015897	Bai2	4:129985077-130022633	q1	q2	OK	56.9452	99.6979	0.807988	1.30139	0.06025	0.802959	no
XLOC_013981	XLOC_013981	9830001H06Rik	2:157010441-157079265	q1	q2	OK	14.7036	8.21873	-0.839182	-1.34844	0.0605	0.804204	no
XLOC_015544	XLOC_015544	Aldh1b1	4:45799021-45804608	q1	q2	OK	3.51164	6.64288	0.919665	1.26386	0.06055	0.804204	no
XLOC_010143	XLOC_010143	4930539E08Rik	17:28896394-28915324	q1	q2	OK	1.33136	2.79041	1.06758	1.31261	0.06045	0.804204	no
XLOC_020728	XLOC_020728	Xylt1	7:117380978-117667630	q1	q2	OK	4.54035	8.13862	0.841982	1.32664	0.06065	0.804839	no
XLOC_001679	XLOC_001679	Gnaz	10:74957476-75032586	q1	q2	OK	16.3773	27.0592	0.724417	1.30878	0.06095	0.808125	no
XLOC_013917	XLOC_013917	BC052486	2:151679885-151701634	q1	q2	OK	1.70332	0.479469	-1.82884	-1.45344	0.06115	0.809385	no
XLOC_004400	XLOC_004400	Limd2	11:106156255-106160142	q1	q2	OK	16.0005	26.6646	0.736803	1.28455	0.06115	0.809385	no
XLOC_017773	XLOC_017773	Steap1	5:5736321-5749317	q1	q2	OK	1.4363	0.365336	-1.97506	-1.42631	0.0617	0.811545	no
XLOC_009221	XLOC_009221	Adamts1	16:85793826-85803115	q1	q2	OK	5.25298	2.97507	-0.820215	-1.28831	0.0619	0.811545	no
XLOC_004057	XLOC_004057	Fam101b	11:76019193-76027782	q1	q2	OK	8.16296	4.68269	-0.801755	-1.30819	0.06165	0.811545	no
XLOC_014603	XLOC_014603	Taf13	3:108571698-108582068	q1	q2	OK	26.0363	15.0469	-0.79106	-1.30626	0.0619	0.811545	no
XLOC_022391	XLOC_022391	D8Ertd82e	8:36094827-36147787	q1	q2	OK	11.2764	6.69913	-0.751265	-1.31074	0.06185	0.811545	no
XLOC_011848	XLOC_011848	Ide	19:37268740-37334544	q1	q2	OK	16.6638	10.1792	-0.71109	-1.33274	0.0616	0.811545	no
XLOC_001075	XLOC_001075	Dbi	1:120113279-120121096	q1	q2	OK	379.344	233.106	-0.702523	-1.31331	0.06205	0.811545	no
XLOC_011617	XLOC_011617	Pacs1	19:5133684-5273119	q1	q2	OK	16.9283	27.4296	0.696302	1.29951	0.06155	0.811545	no
XLOC_026122	XLOC_026122	Cnksr2	X:157821572-158043110	q1	q2	OK	22.9725	38.0669	0.72863	1.33951	0.06155	0.811545	no
XLOC_005734	XLOC_005734	Unc5a	13:54949431-55021385	q1	q2	OK	20.4856	34.2437	0.741233	1.32071	0.06195	0.811545	no
XLOC_025529	XLOC_025529	Klhl34	X:157818434-157820369	q1	q2	OK	15.8719	26.6144	0.745735	1.33027	0.0614	0.811545	no
XLOC_006392	XLOC_006392	Rasgrf2	13:92022788-92131494	q1	q2	OK	8.75019	15.6878	0.842255	1.28069	0.062	0.811545	no
XLOC_012366	XLOC_012366	Cdca7	2:72476218-72499861	q1	q2	OK	0.802432	2.39757	1.57912	1.45639	0.0619	0.811545	no
XLOC_008141	XLOC_008141	Gm19859	15:74391741-74396092	q1	q2	OK	0.36415	1.81751	2.31936	1.52142	0.0616	0.811545	no
XLOC_015746	XLOC_015746	Ttc39a	4:109407099-109444745	q1	q2	OK	3.26376	1.48916	-1.13204	-1.31438	0.06265	0.812052	no
XLOC_009607	XLOC_009607	Tap2	17:34204478-34216321	q1	q2	OK	6.83914	3.58314	-0.932589	-1.30589	0.06305	0.812052	no
XLOC_008661	XLOC_008661	Pigz	16:31933850-31946046	q1	q2	OK	8.13244	4.3639	-0.89807	-1.31279	0.0631	0.812052	no
XLOC_017625	XLOC_017625	Rasa4	5:136083915-136111860	q1	q2	OK	5.72184	3.08653	-0.890495	-1.26895	0.0623	0.812052	no
XLOC_019507	XLOC_019507	Cyp26b1	6:84571413-84593908	q1	q2	OK	5.05685	2.73493	-0.886736	-1.3228	0.0622	0.812052	no
XLOC_023681	XLOC_023681	Vwa5a	9:38718267-38743337	q1	q2	OK	5.89954	3.26315	-0.854334	-1.32511	0.06315	0.812052	no
XLOC_015209	XLOC_015209	Csf1	3:107741047-107760469	q1	q2	OK	9.6452	5.61666	-0.780097	-1.31304	0.0629	0.812052	no
XLOC_019000	XLOC_019000	D6Wsu116e	6:116208032-116262671	q1	q2	OK	54.9137	32.3401	-0.763843	-1.32373	0.0631	0.812052	no
XLOC_012886	XLOC_012886	Trp53inp2	2:155381855-155389847	q1	q2	OK	93.3009	55.7	-0.744213	-1.29488	0.06225	0.812052	no
XLOC_019831	XLOC_019831	Eps8	6:137477244-137649120	q1	q2	OK	16.9001	10.0902	-0.74408	-1.31948	0.0633	0.812052	no
XLOC_011599	XLOC_011599	Syt12	19:4425456-4477143	q1	q2	OK	21.2188	12.9328	-0.714309	-1.27669	0.0628	0.812052	no
XLOC_019658	XLOC_019658	Lrtm2	6:119236525-119352407	q1	q2	OK	18.587	29.9351	0.687546	1.2894	0.06325	0.812052	no
XLOC_005360	XLOC_005360	Dio2	12:90724551-90738438	q1	q2	OK	7.77594	12.6533	0.702421	1.31987	0.06305	0.812052	no
XLOC_013626	XLOC_013626	Cry2	2:92403645-92434069	q1	q2	OK	32.9707	53.7198	0.70427	1.29336	0.0631	0.812052	no
XLOC_004470	XLOC_004470	Hn1	11:115497352-115514370	q1	q2	OK	40.0463	66.7808	0.737765	1.33489	0.06325	0.812052	no
XLOC_001203	XLOC_001203	Cacna1e	1:154392518-154725920	q1	q2	OK	17.8274	29.7714	0.739831	1.30642	0.0628	0.812052	no
XLOC_017505	XLOC_017505	Rasal1	5:120648821-120679593	q1	q2	OK	18.8072	32.1823	0.774985	1.29308	0.0631	0.812052	no
XLOC_015263	XLOC_015263	Snx7	3:117781496-117868936	q1	q2	OK	5.30142	9.83439	0.891456	1.30917	0.0626	0.812052	no
XLOC_014539	XLOC_014539	Hmgcs2	3:98280430-98310738	q1	q2	OK	3.16334	5.86957	0.891808	1.33145	0.0627	0.812052	no
XLOC_023258	XLOC_023258	Tox3	8:90247109-90348252	q1	q2	OK	3.24833	6.10997	0.911468	1.30677	0.0628	0.812052	no
XLOC_006384	XLOC_006384	Atp6ap1l	13:90883448-90905355	q1	q2	OK	7.15348	13.698	0.937248	1.31113	0.06235	0.812052	no
XLOC_014584	XLOC_014584	Kcna3	3:107036161-107038129	q1	q2	OK	2.82465	5.70386	1.01387	1.31688	0.06255	0.812052	no
XLOC_008487	XLOC_008487	Itga5	15:103344285-103366748	q1	q2	OK	1.30315	2.66514	1.0322	1.33882	0.06295	0.812052	no
XLOC_024261	XLOC_024261	Endod1	9:14353989-14381242	q1	q2	OK	41.9222	25.425	-0.721468	-1.30537	0.0638	0.817106	no
XLOC_011872	XLOC_011872	Slit1	19:41600256-41743856	q1	q2	OK	8.77686	15.5622	0.826273	1.34515	0.06375	0.817106	no
XLOC_000331	XLOC_000331	Sned1	1:93235896-93296448	q1	q2	OK	3.20133	1.6112	-0.990535	-1.33728	0.0639	0.817708	no
XLOC_009654	XLOC_009654	H2-Q10	17:35470088-35474563	q1	q2	OK	0.941585	0.189076	-2.31612	-1.48259	0.06445	0.819069	no
XLOC_025610	XLOC_025610	Cybb	X:9424227-9469324	q1	q2	OK	0.763396	0.279343	-1.4504	-1.34113	0.0641	0.819069	no
XLOC_015090	XLOC_015090	Cgn	3:94760068-94786515	q1	q2	OK	2.21762	1.09798	-1.01415	-1.32508	0.0646	0.819069	no
XLOC_020723	XLOC_020723	Insc	7:114745765-114850380	q1	q2	OK	4.09553	2.03056	-1.01217	-1.26684	0.0643	0.819069	no
XLOC_005383	XLOC_005383	Gpr68	12:100876681-100908198	q1	q2	OK	5.17933	2.76831	-0.903761	-1.31568	0.0646	0.819069	no
XLOC_015045	XLOC_015045	S100a1	3:90511033-90514330	q1	q2	OK	116.949	71.013	-0.719726	-1.29581	0.06435	0.819069	no
XLOC_007603	XLOC_007603	Laptm4b	15:34238025-34284295	q1	q2	OK	65.6093	40.7349	-0.687635	-1.28792	0.0647	0.819069	no
XLOC_018300	XLOC_018300	Cdk2ap1	5:124345438-124354628	q1	q2	OK	84.9603	53.5313	-0.666406	-1.2629	0.06465	0.819069	no
XLOC_006472	XLOC_006472	Zswim6	13:107724616-107890064	q1	q2	OK	4.9096	8.24664	0.7482	1.33111	0.0645	0.819069	no
XLOC_019639	XLOC_019639	Plxnd1	6:115954810-115995005	q1	q2	OK	10.1263	17.0476	0.751461	1.29878	0.06475	0.819069	no
XLOC_023183	XLOC_023183	Arhgap10	8:77250365-77518578	q1	q2	OK	6.0075	10.4251	0.795227	1.30316	0.0645	0.819069	no
XLOC_007999	XLOC_007999	Cdh6	15:13034199-13173639	q1	q2	OK	1.93865	4.03395	1.05714	1.34785	0.06415	0.819069	no
XLOC_019601	XLOC_019601	Gm19757	6:105481265-105492668	q1	q2	OK	0.403526	1.02399	1.34347	1.29486	0.06475	0.819069	no
XLOC_013003	XLOC_013003	Mc3r	2:172248491-172251114	q1	q2	OK	0.342278	1.02068	1.57629	1.35337	0.0644	0.819069	no
XLOC_011488	XLOC_011488	Sema4g	19:44989343-45003395	q1	q2	OK	15.3691	9.44894	-0.701813	-1.28572	0.06495	0.820253	no
XLOC_011150	XLOC_011150	Dok6	18:89301134-89769136	q1	q2	OK	6.82882	13.9304	1.02853	1.33054	0.06495	0.820253	no
XLOC_007612	XLOC_007612	Spag1	15:36179529-36235177	q1	q2	OK	5.5478	2.9766	-0.898253	-1.31518	0.06505	0.820803	no
XLOC_003674	XLOC_003674	Cobl	11:12236675-12464960	q1	q2	OK	8.72768	14.7775	0.759734	1.29629	0.0651	0.820803	no
XLOC_020788	XLOC_020788	Gdpd3	7:126766413-126775645	q1	q2	OK	5.37819	0.188481	-4.83463	-2.92113	0.06525	0.82198	no
XLOC_017180	XLOC_017180	LOC100861912	5:45434031-45450229	q1	q2	OK	285.659	125.448	-1.1872	-1.3256	0.0653	0.82198	no
XLOC_024082	XLOC_024082	6430571L13Rik	9:107340639-107349683	q1	q2	OK	8.95366	4.75809	-0.912096	-1.31405	0.06545	0.823197	no
XLOC_012632	XLOC_012632	Gchfr	2:119167787-119172389	q1	q2	OK	2.86105	0.265173	-3.43154	-1.99952	0.0662	0.824473	no
XLOC_025028	XLOC_025028	Rgn	X:20549817-20562087	q1	q2	OK	0.787334	0.199276	-1.9822	-1.39855	0.066	0.824473	no
XLOC_023503	XLOC_023503	Casp12	9:5345475-5373034	q1	q2	OK	1.12657	0.44281	-1.34717	-1.28441	0.06585	0.824473	no
XLOC_007643	XLOC_007643	Aard	15:52040106-52045722	q1	q2	OK	4.16132	1.67316	-1.31446	-1.37604	0.0662	0.824473	no
XLOC_013798	XLOC_013798	Hdc	2:126593667-126618665	q1	q2	OK	2.79134	1.27695	-1.12825	-1.3072	0.06575	0.824473	no
XLOC_007529	XLOC_007529	A2ld1	14:122890859-122983261	q1	q2	OK	31.1561	14.2872	-1.12479	-1.30297	0.0659	0.824473	no
XLOC_006293	XLOC_006293	Fancc	13:63304708-63431745	q1	q2	OK	4.34843	2.24017	-0.956887	-1.28143	0.06625	0.824473	no
XLOC_022077	XLOC_022077	Fgfr2	7:130162450-130266808	q1	q2	OK	14.4214	8.82474	-0.70859	-1.27921	0.06565	0.824473	no
XLOC_018677	XLOC_018677	Zyx	6:42349827-42358395	q1	q2	OK	27.8937	17.1901	-0.69836	-1.27534	0.0663	0.824473	no
XLOC_014947	XLOC_014947	Rapgef2	3:79062527-79145875	q1	q2	OK	17.9361	29.0508	0.695708	1.29165	0.0663	0.824473	no
XLOC_004828	XLOC_004828	Dnalc1	12:84114327-84143517	q1	q2	OK	18.1263	29.7904	0.716768	1.31545	0.0663	0.824473	no
XLOC_020144	XLOC_020144	Hipk4	7:27523260-27531175	q1	q2	OK	10.2262	17.2356	0.753125	1.29367	0.06575	0.824473	no
XLOC_004323	XLOC_004323	Hap1	11:100347326-100356141	q1	q2	OK	71.4956	120.765	0.756273	1.27059	0.06625	0.824473	no
XLOC_020824	XLOC_020824	Itgam	7:128062639-128118491	q1	q2	OK	3.85266	6.72462	0.803596	1.31053	0.066	0.824473	no
XLOC_022647	XLOC_022647	Cyld	8:88697027-88751945	q1	q2	OK	19.0776	31.7831	0.736379	1.30317	0.0664	0.825051	no
XLOC_026117	XLOC_026117	Ptchd1	X:155569735-155623327	q1	q2	OK	6.51116	3.85578	-0.75589	-1.29251	0.06665	0.82749	no
XLOC_011382	XLOC_011382	Slc1a1	19:28835165-28913960	q1	q2	OK	25.0164	40.8278	0.706677	1.30572	0.06685	0.829306	no
XLOC_010761	XLOC_010761	Megf10	18:57133089-57297467	q1	q2	OK	8.61583	5.17087	-0.736584	-1.28647	0.06705	0.831118	no
XLOC_017945	XLOC_017945	Qdpr	5:45434031-45450229	q1	q2	OK	152.503	77.3709	-0.978971	-1.29085	0.0673	0.832828	no
XLOC_006861	XLOC_006861	A930011O12Rik,Mir124a-1,Mir3078	14:64588114-64593961	q1	q2	OK	67.2614	39.9141	-0.752878	-0.768065	0.06725	0.832828	no
XLOC_006983	XLOC_006983	Gpc5	14:115092214-116525192	q1	q2	OK	11.7951	19.2033	0.703161	1.27632	0.06735	0.832828	no
XLOC_015304	XLOC_015304	Sgms2	3:131318984-131344923	q1	q2	OK	1.44523	0.704403	-1.03682	-1.25741	0.06755	0.833297	no
XLOC_011952	XLOC_011952	Ablim1	19:57033263-57216032	q1	q2	OK	31.3964	18.9158	-0.731004	-1.29785	0.0675	0.833297	no
XLOC_007793	XLOC_007793	Csdc2	15:81936758-81950941	q1	q2	OK	90.019	54.936	-0.712476	-1.26742	0.0675	0.833297	no
XLOC_014818	XLOC_014818	Arpm1	3:30597072-30599870	q1	q2	OK	0.973536	0.294063	-1.72711	-1.42421	0.0678	0.835045	no
XLOC_006865	XLOC_006865	Zfp395	14:65358675-65398930	q1	q2	OK	5.82286	3.26034	-0.836704	-1.28522	0.0678	0.835045	no
XLOC_004595	XLOC_004595	Sdc1	12:8771395-8793688	q1	q2	OK	1.28571	0.393825	-1.70693	-1.3579	0.068	0.835403	no
XLOC_004504	XLOC_004504	Mxra7	11:116803399-116828046	q1	q2	OK	8.78273	4.50328	-0.963694	-1.32497	0.0681	0.835403	no
XLOC_005060	XLOC_005060	Crip2	12:113140235-113145506	q1	q2	OK	44.1475	74.5788	0.756435	1.3099	0.068	0.835403	no
XLOC_006241	XLOC_006241	Klhl3	13:58004956-58102428	q1	q2	OK	5.35125	9.59836	0.842912	1.27977	0.06805	0.835403	no
XLOC_007927	XLOC_007927	Grasp	15:101221190-101232756	q1	q2	OK	12.796	24.4188	0.932302	1.3481	0.0681	0.835403	no
XLOC_023504	XLOC_023504	Pdgfd	9:6168611-6377519	q1	q2	OK	4.04051	1.81319	-1.15601	-1.28919	0.0683	0.837033	no
XLOC_008133	XLOC_008133	Eif2c2	15:73101624-73184947	q1	q2	OK	8.57915	13.8595	0.691963	1.26784	0.0684	0.837033	no
XLOC_015511	XLOC_015511	Dnajb5	4:42953093-42958732	q1	q2	OK	33.3784	53.9468	0.692622	1.27336	0.0684	0.837033	no
XLOC_000169	XLOC_000169	Nrp2	1:62703316-62818692	q1	q2	OK	6.62819	10.997	0.730419	1.27181	0.06845	0.837033	no
XLOC_004667	XLOC_004667	Sypl	12:32953944-32979502	q1	q2	OK	15.1703	9.40737	-0.689386	-1.27348	0.0687	0.839425	no
XLOC_025551	XLOC_025551	Fancb	X:164980591-164997272	q1	q2	OK	0.522456	1.25708	1.2667	1.24117	0.0689	0.841202	no
XLOC_022896	XLOC_022896	Pcp2	8:3621550-3625545	q1	q2	OK	231.922	1.65917	-7.12704	-2.7548	0.06915	0.841533	no
XLOC_000958	XLOC_000958	Pax3	1:78101266-78197136	q1	q2	OK	0.913186	0.0210286	-5.44048	-2.1397	0.0692	0.841533	no
XLOC_010483	XLOC_010483	Emilin2	17:71252175-71310965	q1	q2	OK	1.68073	0.776561	-1.11392	-1.28789	0.0691	0.841533	no
XLOC_005507	XLOC_005507	Nid1	13:13437601-13512275	q1	q2	OK	4.17155	2.31874	-0.847245	-1.28948	0.06915	0.841533	no
XLOC_008094	XLOC_008094	Klhl38	15:58314572-58324169	q1	q2	OK	0.297901	0.947772	1.66971	1.39588	0.0692	0.841533	no
XLOC_014518	XLOC_014518	Hfe2	3:96525184-96529216	q1	q2	OK	0.335362	1.08215	1.69011	1.41602	0.06945	0.843908	no
XLOC_006957	XLOC_006957	Scel	14:103513340-103613346	q1	q2	OK	0.941961	2.21478	1.23343	1.3164	0.06955	0.844457	no
XLOC_019066	XLOC_019066	C1ra	6:124512620-124523440	q1	q2	OK	0.88142	0.263262	-1.74333	-1.38838	0.06975	0.84616	no
XLOC_012709	XLOC_012709	Fbln7	2:128863931-128897034	q1	q2	OK	1.82069	0.776163	-1.23005	-1.29037	0.0698	0.84616	no
XLOC_009023	XLOC_009023	Masp1	16:23451784-23520590	q1	q2	OK	3.38143	1.68003	-1.00914	-1.2681	0.06995	0.846648	no
XLOC_014432	XLOC_014432	S100a6	3:90612893-90614414	q1	q2	OK	29.0205	15.8339	-0.874054	-1.26658	0.0699	0.846648	no
XLOC_018249	XLOC_018249	Sdsl	5:120458201-120472763	q1	q2	OK	4.98211	2.04611	-1.28387	-1.34757	0.07005	0.847193	no
XLOC_015787	XLOC_015787	Ccdc163	4:116708929-116715104	q1	q2	OK	3.22822	1.12652	-1.51886	-1.37202	0.07025	0.848281	no
XLOC_025723	XLOC_025723	Apln	X:48025145-48034852	q1	q2	OK	9.79365	5.72634	-0.774233	-1.25676	0.07025	0.848281	no
XLOC_011697	XLOC_011697	Rom1	19:8927381-8929356	q1	q2	OK	8.84999	4.55403	-0.958533	-1.27529	0.07045	0.850031	no
XLOC_021926	XLOC_021926	Stk33	7:109279215-109444895	q1	q2	OK	0.441504	1.25699	1.50948	1.30135	0.0706	0.851174	no
XLOC_000413	XLOC_000413	Slc45a3	1:131962966-131982964	q1	q2	OK	1.25109	0.488391	-1.35708	-1.33892	0.07125	0.853607	no
XLOC_012126	XLOC_012126	2010317E24Rik	2:25372320-25378213	q1	q2	OK	0.841193	0.333695	-1.33391	-1.26297	0.0713	0.853607	no
XLOC_006125	XLOC_006125	Serpinb1a	13:32841290-32851185	q1	q2	OK	12.8529	7.23226	-0.829578	-1.23183	0.07105	0.853607	no
XLOC_000332	XLOC_000332	Ppp1r7	1:93343644-93367618	q1	q2	OK	22.8284	35.9498	0.655159	1.25099	0.07095	0.853607	no
XLOC_012944	XLOC_012944	Ttpal	2:163602313-163619013	q1	q2	OK	14.1781	22.6247	0.674231	1.27824	0.0713	0.853607	no
XLOC_015096	XLOC_015096	Pip5k1a	3:95059594-95106858	q1	q2	OK	14.1295	23.0869	0.708361	1.28314	0.0712	0.853607	no
XLOC_013425	XLOC_013425	Ccdc141	2:77009905-77170635	q1	q2	OK	3.25611	5.45997	0.745743	1.26888	0.071	0.853607	no
XLOC_005743	XLOC_005743	Prr7	13:55464266-55473155	q1	q2	OK	16.9869	30.2291	0.831516	1.30128	0.071	0.853607	no
XLOC_018928	XLOC_018928	Fbln2	6:91212763-91272540	q1	q2	OK	1.36871	2.68353	0.971314	1.29419	0.07115	0.853607	no
XLOC_018145	XLOC_018145	Hfm1	5:106840196-106925890	q1	q2	OK	0.617507	1.56109	1.33803	1.20569	0.0714	0.854141	no
XLOC_001090	XLOC_001090	Lct	1:128284763-128328318	q1	q2	OK	0.946336	0.391859	-1.27202	-1.31185	0.0716	0.85448	no
XLOC_001113	XLOC_001113	Cntn2	1:132509424-132542940	q1	q2	OK	32.4658	19.2502	-0.754049	-1.28721	0.0716	0.85448	no
XLOC_004948	XLOC_004948	Cyp46a1	12:108334380-108362234	q1	q2	OK	74.0097	122.536	0.727422	1.22003	0.07155	0.85448	no
XLOC_023393	XLOC_023393	1700030J22Rik	8:116969598-116978943	q1	q2	OK	1.63484	3.29546	1.01133	1.28978	0.07165	0.85448	no
XLOC_005742	XLOC_005742	Grk6	13:55445333-55460927	q1	q2	OK	21.3549	35.0952	0.716706	1.27496	0.0718	0.855607	no
XLOC_021878	XLOC_021878	Gm8995	7:106503885-106529189	q1	q2	OK	0.844318	0.393162	-1.10266	-1.28768	0.07215	0.857129	no
XLOC_017478	XLOC_017478	Cit	5:115845655-116006343	q1	q2	OK	9.40217	14.7725	0.651853	1.2387	0.07215	0.857129	no
XLOC_020009	XLOC_020009	Nova2	7:18925887-18965319	q1	q2	OK	12.0357	19.5251	0.698009	1.30238	0.07205	0.857129	no
XLOC_001871	XLOC_001871	Cdk17	10:93160875-93241342	q1	q2	OK	43.0787	70.2821	0.706181	1.24969	0.07205	0.857129	no
XLOC_004274	XLOC_004274	Krt10	11:99385253-99389364	q1	q2	OK	3.77357	7.05428	0.902569	1.25396	0.07235	0.858843	no
XLOC_019956	XLOC_019956	2310014L17Rik	7:12927415-12931072	q1	q2	OK	0.790999	0.295542	-1.42031	-1.29506	0.07255	0.860555	no
XLOC_016701	XLOC_016701	Rps15a-ps4	4:132219892-132220589	q1	q2	OK	1.45138	0.275879	-2.39532	-1.42488	0.073	0.865227	no
XLOC_008513	XLOC_008513	Sec14l5	16:5147108-5183934	q1	q2	OK	5.96441	3.15694	-0.917855	-1.25473	0.0731	0.865747	no
XLOC_020139	XLOC_020139	Numbl	7:27258760-27282150	q1	q2	OK	27.2656	43.7156	0.68107	1.26122	0.0734	0.867966	no
XLOC_011050	XLOC_011050	Slc6a7	18:60995379-61014199	q1	q2	OK	18.5556	30.1751	0.701506	1.25106	0.0734	0.867966	no
XLOC_008314	XLOC_008314	Ldoc1l	15:84553397-84557823	q1	q2	OK	13.9129	22.4344	0.689295	1.27436	0.07355	0.868998	no
XLOC_001896	XLOC_001896	Epyc	10:97644067-97967090	q1	q2	OK	0.339189	1.83549	2.436	1.25226	0.0736	0.868998	no
XLOC_022176	XLOC_022176	6330512M04Rik	7:142326109-142372259	q1	q2	OK	4.25514	2.19842	-0.95274	-1.28494	0.07395	0.870465	no
XLOC_006572	XLOC_006572	Synpr	14:13284779-13615469	q1	q2	OK	37.1751	60.83	0.710449	1.25837	0.0738	0.870465	no
XLOC_011919	XLOC_011919	Psd	19:46303584-46327156	q1	q2	OK	77.8709	138.836	0.834228	1.27487	0.07395	0.870465	no
XLOC_019834	XLOC_019834	Igbp1b	6:138657088-138658444	q1	q2	OK	0.208849	1.61882	2.95441	1.82502	0.0739	0.870465	no
XLOC_002881	XLOC_002881	Gdf9	11:53433285-53437903	q1	q2	OK	0.803227	0.241309	-1.73493	-1.37264	0.07425	0.871999	no
XLOC_009987	XLOC_009987	Dact2	17:14195229-14203831	q1	q2	OK	14.196	23.6603	0.736985	1.24341	0.07425	0.871999	no
XLOC_016533	XLOC_016533	Gm12816	4:112804615-113286973	q1	q2	OK	0.100628	9.33088	6.53491	3.76393	0.07415	0.871999	no
XLOC_018827	XLOC_018827	Capg	6:72544438-72562980	q1	q2	OK	4.38891	1.88149	-1.22199	-1.29104	0.0744	0.872432	no
XLOC_016715	XLOC_016715	Smpdl3b	4:132732965-132757171	q1	q2	OK	1.16066	2.65983	1.19639	1.23441	0.07435	0.872432	no
XLOC_005877	XLOC_005877	Lhfpl2	13:94057795-94195409	q1	q2	OK	8.46032	5.02932	-0.750348	-1.25418	0.0745	0.872941	no
XLOC_015341	XLOC_015341	Clca1	3:144730315-144760739	q1	q2	OK	0.106876	0.740457	2.79248	1.67926	0.0746	0.873449	no
XLOC_005836	XLOC_005836	Pcsk1	13:75089986-75132498	q1	q2	OK	7.251	12.2757	0.75955	1.25653	0.07485	0.874968	no
XLOC_002158	XLOC_002158	Tpd52l1	10:31332379-31445921	q1	q2	OK	15.0984	26.1423	0.791988	1.25576	0.0749	0.874968	no
XLOC_013074	XLOC_013074	Col20a1	2:180986534-181017540	q1	q2	OK	1.17048	2.34362	1.00164	1.28126	0.0749	0.874968	no
XLOC_007418	XLOC_007418	Gm16867	14:69337150-69366742	q1	q2	OK	0.824201	0.246525	-1.74126	-1.36173	0.0753	0.876983	no
XLOC_014505	XLOC_014505	Otud7b	3:96104526-96161129	q1	q2	OK	12.878	8.14234	-0.661397	-1.22292	0.07525	0.876983	no
XLOC_009948	XLOC_009948	Ezr	17:6738130-6782780	q1	q2	OK	15.6114	25.1989	0.690761	1.23968	0.0752	0.876983	no
XLOC_001502	XLOC_001502	Sgk1	10:21882183-21999903	q1	q2	OK	34.615	57.0623	0.721141	1.26176	0.07525	0.876983	no
XLOC_021454	XLOC_021454	Iglon5	7:43472906-43490023	q1	q2	OK	23.333	14.2614	-0.710256	-1.26186	0.0754	0.877485	no
XLOC_024073	XLOC_024073	Abhd14b	9:106448639-106452918	q1	q2	OK	17.4687	10.3254	-0.758572	-1.20644	0.0756	0.878487	no
XLOC_009255	XLOC_009255	2610039C10Rik	16:90719311-90727371	q1	q2	OK	2.91449	6.16949	1.08191	1.26083	0.07555	0.878487	no
XLOC_000508	XLOC_000508	Abl2	1:156558786-156649619	q1	q2	OK	7.78147	12.3269	0.663697	1.23105	0.0758	0.880148	no
XLOC_021260	XLOC_021260	Pafah1b3	7:25295048-25297955	q1	q2	OK	14.0925	7.08433	-0.992221	-1.2691	0.076	0.881143	no
XLOC_021587	XLOC_021587	Mkrn3	7:62417592-62420139	q1	q2	OK	1.30685	2.99794	1.19787	1.3072	0.07595	0.881143	no
XLOC_005400	XLOC_005400	Ifi27l2a	12:103442166-103443680	q1	q2	OK	7.21034	2.26809	-1.66859	-1.33586	0.07615	0.881885	no
XLOC_026115	XLOC_026115	Sat1	X:155213137-155216409	q1	q2	OK	44.1506	27.0324	-0.707745	-1.25376	0.07635	0.881885	no
XLOC_005270	XLOC_005270	Kcnh5	12:74897216-75177332	q1	q2	OK	2.13327	3.87603	0.861515	1.24713	0.0763	0.881885	no
XLOC_004212	XLOC_004212	Ngfr	11:95568817-95587698	q1	q2	OK	1.47348	3.07303	1.06044	1.28285	0.07635	0.881885	no
XLOC_023814	XLOC_023814	Crabp1	9:54764807-54773109	q1	q2	OK	2.44276	5.91554	1.276	1.24575	0.07625	0.881885	no
XLOC_004094	XLOC_004094	Ksr1	11:79014800-79146354	q1	q2	OK	7.37562	12.0916	0.713168	1.24502	0.07645	0.882379	no
XLOC_009534	XLOC_009534	Mapk13	17:28769316-28778704	q1	q2	OK	1.50403	0.388311	-1.95355	-1.41852	0.0771	0.884585	no
XLOC_019532	XLOC_019532	Anxa4	6:86736839-86793584	q1	q2	OK	4.31043	2.13559	-1.01319	-1.23375	0.0768	0.884585	no
XLOC_004522	XLOC_004522	Tbc1d16	11:119143042-119228499	q1	q2	OK	13.3977	21.6553	0.69273	1.25828	0.0771	0.884585	no
XLOC_013345	XLOC_013345	Nr4a2	2:57107225-57124003	q1	q2	OK	10.741	17.9815	0.743383	1.24826	0.07705	0.884585	no
XLOC_021129	XLOC_021129	Hif3a	7:17030992-17062427	q1	q2	OK	0.936186	1.77702	0.924594	1.2537	0.07675	0.884585	no
XLOC_004947	XLOC_004947	Hhipl1	12:108306199-108328300	q1	q2	OK	1.55604	3.04141	0.966867	1.18101	0.077	0.884585	no
XLOC_014961	XLOC_014961	Gm10710	3:83125275-83129246	q1	q2	OK	0.297842	0.813375	1.44937	1.33571	0.07695	0.884585	no
XLOC_014960	XLOC_014960	Fgb	3:83042246-83049790	q1	q2	OK	1.6884	0	#NAME?	#NAME?	0.0769	0.884585	no
XLOC_007134	XLOC_007134	Colq	14:31523083-31577383	q1	q2	OK	1.304	0.505539	-1.36705	-1.30154	0.0772	0.885074	no
XLOC_005675	XLOC_005675	Cd83	13:43785106-43803132	q1	q2	OK	15.8542	9.49134	-0.740179	-1.2318	0.0773	0.885562	no
XLOC_023144	XLOC_023144	Ssbp4	8:70597489-70608314	q1	q2	OK	52.7582	84.3793	0.677495	1.25278	0.07755	0.887766	no
XLOC_004412	XLOC_004412	Polg2	11:106768203-106779537	q1	q2	OK	2.62446	1.07935	-1.28186	-1.26843	0.07765	0.888165	no
XLOC_025438	XLOC_025438	Plp1	X:136822835-136837743	q1	q2	OK	1184.26	518.295	-1.19214	-1.27404	0.0777	0.888165	no
XLOC_017949	XLOC_017949	Kcnip4	5:48389502-49524904	q1	q2	OK	38.8925	24.2646	-0.680643	-1.24666	0.0779	0.889132	no
XLOC_002388	XLOC_002388	Jsrp1	10:80808495-80813498	q1	q2	OK	1.82886	4.47561	1.29114	1.24381	0.0779	0.889132	no
XLOC_003760	XLOC_003760	Nipal4	11:46148154-46166359	q1	q2	OK	3.5182	1.75798	-1.00092	-1.27145	0.0783	0.891718	no
XLOC_019100	XLOC_019100	Tspan11	6:127887621-127953031	q1	q2	OK	2.72325	1.37266	-0.98835	-1.2494	0.07825	0.891718	no
XLOC_023105	XLOC_023105	Klhl2	8:64811677-64849818	q1	q2	OK	51.5014	84.8758	0.720742	1.20542	0.0782	0.891718	no
XLOC_006354	XLOC_006354	Cep72	13:74036494-74062285	q1	q2	OK	1.6278	0.720826	-1.1752	-1.2644	0.0785	0.891841	no
XLOC_021752	XLOC_021752	Relt	7:100845847-100863413	q1	q2	OK	8.49467	5.0879	-0.739487	-1.17611	0.07845	0.891841	no
XLOC_003741	XLOC_003741	Wwc1	11:35839177-35980089	q1	q2	OK	21.2125	33.4383	0.65659	1.23914	0.07855	0.891841	no
XLOC_007293	XLOC_007293	Myh7	14:54968786-54994549	q1	q2	OK	2.42764	4.34426	0.839556	1.25512	0.0786	0.891841	no
XLOC_005338	XLOC_005338	Zdhhc22	12:86983380-86988676	q1	q2	OK	11.6245	22.0314	0.922394	1.26402	0.0785	0.891841	no
XLOC_023210	XLOC_023210	2210011C24Rik	8:84010227-84012156	q1	q2	OK	1.36142	0.419106	-1.69973	-0.678639	0.07875	0.892886	no
XLOC_023353	XLOC_023353	Hp	8:109575127-109579172	q1	q2	OK	1.42558	0.142836	-3.31912	-1.90625	0.07895	0.893749	no
XLOC_015554	XLOC_015554	Col15a1	4:47208011-47313165	q1	q2	OK	1.55839	0.776471	-1.00505	-1.21433	0.079	0.893749	no
XLOC_006877	XLOC_006877	Pnma2	14:66911207-66920061	q1	q2	OK	12.6048	20.2612	0.684744	1.23402	0.0789	0.893749	no
XLOC_009644	XLOC_009644	Ltb	17:35194506-35196305	q1	q2	OK	1.18874	0.328542	-1.85528	-1.36945	0.0791	0.894224	no
XLOC_012698	XLOC_012698	Adra2b	2:127363285-127367221	q1	q2	OK	0.400446	0.973744	1.28193	1.284	0.0792	0.894699	no
XLOC_003126	XLOC_003126	Rilp	11:75510093-75513168	q1	q2	OK	1.67005	0.627183	-1.41293	-1.25967	0.0794	0.895646	no
XLOC_006363	XLOC_006363	Cast	13:74694285-74807921	q1	q2	OK	6.03494	3.30785	-0.867445	-1.23883	0.07935	0.895646	no
XLOC_024160	XLOC_024160	Lrrc2	9:110951544-110984066	q1	q2	OK	1.48115	0.622942	-1.24955	-1.29822	0.07965	0.897809	no
XLOC_011360	XLOC_011360	Trpm3	19:22139116-22989884	q1	q2	OK	21.6316	12.7994	-0.757066	-1.20008	0.07975	0.89828	no
XLOC_020722	XLOC_020722	Calcb	7:114718642-114723365	q1	q2	OK	1.44031	0.232589	-2.63052	-1.55019	0.0799	0.898471	no
XLOC_014382	XLOC_014382	Paqr6	3:88364588-88368541	q1	q2	OK	15.8849	9.00741	-0.818474	-1.24737	0.07985	0.898471	no
XLOC_020721	XLOC_020721	Pde3b	7:114415253-114537937	q1	q2	OK	4.82975	2.86379	-0.754021	-1.21135	0.08	0.898471	no
XLOC_008547	XLOC_008547	Mpv17l	16:13940694-13949357	q1	q2	OK	20.6794	32.6974	0.66098	1.24163	0.08	0.898471	no
XLOC_022608	XLOC_022608	Cacna1a	8:84415363-84640249	q1	q2	OK	34.6336	20.8094	-0.734936	-1.25583	0.0802	0.900061	no
XLOC_001189	XLOC_001189	Rgl1	1:152517529-152625111	q1	q2	OK	18.1093	28.4422	0.651303	1.21537	0.08035	0.900434	no
XLOC_018606	XLOC_018606	Mest	6:30733505-30750638	q1	q2	OK	9.95895	19.7187	0.985495	1.23776	0.08035	0.900434	no
XLOC_010437	XLOC_010437	Mllt1	17:56892610-56935388	q1	q2	OK	17.3799	27.4996	0.66199	1.24551	0.08045	0.9009	no
XLOC_011567	XLOC_011567	Slc18a2	19:59260877-59296012	q1	q2	OK	4.2404	2.37749	-0.834762	-1.2065	0.0807	0.903044	no
XLOC_008178	XLOC_008178	Nrbp2	15:76085593-76090013	q1	q2	OK	75.9341	48.4673	-0.647736	-1.2184	0.0809	0.904625	no
XLOC_012696	XLOC_012696	Dusp2	2:127336158-127338377	q1	q2	OK	1.01045	0.332163	-1.60504	-1.30414	0.0812	0.905063	no
XLOC_016865	XLOC_016865	2610305D13Rik	4:147611935-147642551	q1	q2	OK	0.903228	0.312032	-1.5334	-1.301	0.08135	0.905063	no
XLOC_002408	XLOC_002408	Nfic	10:81396190-81427173	q1	q2	OK	28.7096	17.7677	-0.692278	-1.20439	0.08135	0.905063	no
XLOC_004356	XLOC_004356	Mpp3	11:101999651-102026955	q1	q2	OK	31.8819	19.93	-0.677796	-1.22128	0.08135	0.905063	no
XLOC_019883	XLOC_019883	Cacng8	7:3394116-3415605	q1	q2	OK	25.5297	41.9711	0.717216	1.19913	0.0813	0.905063	no
XLOC_022477	XLOC_022477	Npy1r	8:66697421-66706798	q1	q2	OK	5.84571	10.2765	0.813903	1.25818	0.08105	0.905063	no
XLOC_001432	XLOC_001432	Syt14	1:192897306-193035698	q1	q2	OK	2.05088	4.28691	1.0637	1.24502	0.08135	0.905063	no
XLOC_014711	XLOC_014711	Gbp5	3:142496933-142522344	q1	q2	OK	2.13242	0.990385	-1.10643	-1.23702	0.08155	0.905232	no
XLOC_022144	XLOC_022144	Ifitm3	7:141009589-141010744	q1	q2	OK	34.857	19.6254	-0.828721	-1.19813	0.0816	0.905232	no
XLOC_003293	XLOC_003293	Ppp1r9b	11:94991211-95026087	q1	q2	OK	181.14	345.149	0.930111	1.24828	0.0816	0.905232	no
XLOC_000428	XLOC_000428	Kiss1	1:133327211-133329722	q1	q2	OK	0.345016	2.76174	3.00084	1.61748	0.08155	0.905232	no
XLOC_000085	XLOC_000085	Npas2	1:39194271-39363240	q1	q2	OK	5.97963	9.92253	0.730651	1.17755	0.0818	0.906147	no
XLOC_004448	XLOC_004448	Sdk2	11:113780789-114065951	q1	q2	OK	1.44429	2.60313	0.849892	1.24701	0.0818	0.906147	no
XLOC_020398	XLOC_020398	Luzp2	7:54834302-55268888	q1	q2	OK	45.5712	28.3229	-0.686154	-1.21483	0.08225	0.909172	no
XLOC_000514	XLOC_000514	Astn1	1:158362303-158691786	q1	q2	OK	33.2243	54.4907	0.713771	1.22708	0.08215	0.909172	no
XLOC_001291	XLOC_001291	Nos1ap	1:170317495-170589849	q1	q2	OK	14.9538	24.5927	0.717713	1.23471	0.0822	0.909172	no
XLOC_013730	XLOC_013730	Bmf	2:118528756-118549678	q1	q2	OK	2.08289	1.03837	-1.00426	-1.25257	0.08305	0.909539	no
XLOC_003468	XLOC_003468	Ccdc45	11:106789251-106818861	q1	q2	OK	6.15046	3.43445	-0.840614	-1.22593	0.08255	0.909539	no
XLOC_013448	XLOC_013448	Serping1	2:84765359-84775429	q1	q2	OK	11.0391	6.29436	-0.810493	-1.21363	0.08295	0.909539	no
XLOC_000630	XLOC_000630	Zfp238	1:177444660-177450764	q1	q2	OK	129.506	74.7275	-0.793308	-1.23547	0.08285	0.909539	no
XLOC_025711	XLOC_025711	Fam70a	X:38197300-38252481	q1	q2	OK	18.7538	11.7023	-0.680391	-1.22188	0.0828	0.909539	no
XLOC_015676	XLOC_015676	Nfia	4:97567874-98118876	q1	q2	OK	9.62213	6.01444	-0.677925	-1.22248	0.0827	0.909539	no
XLOC_024732	XLOC_024732	Atp1b3	9:96332672-96364299	q1	q2	OK	98.2077	62.7003	-0.647364	-1.22164	0.0827	0.909539	no
XLOC_000443	XLOC_000443	Kdm5b	1:134560177-134632878	q1	q2	OK	10.2231	15.7885	0.627035	1.19357	0.083	0.909539	no
XLOC_016912	XLOC_016912	Ajap1	4:153373220-153482830	q1	q2	OK	12.2824	19.6832	0.680377	1.22077	0.0827	0.909539	no
XLOC_017577	XLOC_017577	Mmp17	5:129584213-129608211	q1	q2	OK	33.6492	55.3425	0.717819	1.23056	0.08305	0.909539	no
XLOC_007817	XLOC_007817	Mpped1	15:83780022-83858474	q1	q2	OK	37.4267	64.2437	0.779486	1.21327	0.0824	0.909539	no
XLOC_014397	XLOC_014397	Thbs3	3:89215186-89226837	q1	q2	OK	4.6083	8.07906	0.809953	1.24094	0.08295	0.909539	no
XLOC_010789	XLOC_010789	1500015A07Rik	18:61726389-61728254	q1	q2	OK	2.87756	5.61598	0.964691	1.23087	0.0829	0.909539	no
XLOC_023078	XLOC_023078	Wwc2	8:47827594-47990551	q1	q2	OK	7.67052	11.9884	0.644241	1.19235	0.08315	0.909889	no
XLOC_023946	XLOC_023946	Arpp19	9:75037613-75060313	q1	q2	OK	44.7089	75.2909	0.751914	1.22297	0.0832	0.909889	no
XLOC_006668	XLOC_006668	E130203B14Rik	14:32856755-32939489	q1	q2	OK	3.6037	1.8521	-0.960319	-1.21156	0.08335	0.91014	no
XLOC_023138	XLOC_023138	Crtc1	8:70382357-70439573	q1	q2	OK	30.7459	48.8963	0.669333	1.23292	0.0834	0.91014	no
XLOC_013287	XLOC_013287	Pbx3	2:34171908-34372036	q1	q2	OK	9.55247	15.8816	0.733412	1.19468	0.08335	0.91014	no
XLOC_010447	XLOC_010447	Cd70	17:57145996-57149777	q1	q2	OK	1.25756	0.177033	-2.82854	-1.57756	0.0836	0.910193	no
XLOC_006809	XLOC_006809	Khnyn	14:55884968-55896781	q1	q2	OK	10.466	6.32963	-0.72552	-1.2153	0.0836	0.910193	no
XLOC_001903	XLOC_001903	Kitl	10:100015823-100100412	q1	q2	OK	18.1433	11.2351	-0.69142	-1.23296	0.0836	0.910193	no
XLOC_024728	XLOC_024728	Trpc1	9:95706626-95750358	q1	q2	OK	9.42002	15.3859	0.707806	1.23815	0.0837	0.910193	no
XLOC_014423	XLOC_014423	Gatad2b	3:90341653-90358120	q1	q2	OK	10.6446	17.8648	0.746995	1.2437	0.0837	0.910193	no
XLOC_001753	XLOC_001753	Palm	10:79792570-79820896	q1	q2	OK	70.0811	112.215	0.679163	1.2016	0.08385	0.911182	no
XLOC_003502	XLOC_003502	Cd300a	11:114890040-114904651	q1	q2	OK	0.914244	0.380993	-1.26282	-1.26973	0.084	0.911527	no
XLOC_022732	XLOC_022732	Fam65a	8:105605228-105622219	q1	q2	OK	20.8224	44.9484	1.11013	0.184747	0.08395	0.911527	no
XLOC_007772	XLOC_007772	Apobec3	15:79889531-79908429	q1	q2	OK	1.7574	0.755805	-1.21736	-1.21409	0.0841	0.91197	no
XLOC_002198	XLOC_002198	Gm9855	10:42052557-42055453	q1	q2	OK	3.36612	6.47626	0.944073	1.25431	0.0843	0.912756	no
XLOC_012791	XLOC_012791	Insm1	2:146221996-146225020	q1	q2	OK	1.31216	2.84708	1.11754	1.23746	0.08435	0.912756	no
XLOC_014096	XLOC_014096	Gm19544	2:174266427-174272261	q1	q2	OK	1.33911	3.98138	1.57199	1.2966	0.08425	0.912756	no
XLOC_015782	XLOC_015782	Pik3r3	4:116221913-116303056	q1	q2	OK	25.4956	15.8656	-0.684349	-1.21426	0.08445	0.913197	no
XLOC_007501	XLOC_007501	Pou4f1	14:104462319-104467999	q1	q2	OK	1.37893	0.0306104	-5.49338	-3.33804	0.0849	0.916675	no
XLOC_020830	XLOC_020830	Bag3	7:128523582-128546981	q1	q2	OK	7.4607	4.10942	-0.860376	-1.23712	0.0849	0.916675	no
XLOC_009358	XLOC_009358	Smoc2	17:14279505-14404790	q1	q2	OK	3.41124	6.05059	0.826779	1.17821	0.08495	0.916675	no
XLOC_014025	XLOC_014025	Slpi	2:164354069-164356507	q1	q2	OK	2.13317	0.163292	-3.70747	-2.09513	0.0851	0.917549	no
XLOC_003181	XLOC_003181	Rab11fip4	11:79591211-79694012	q1	q2	OK	38.7184	61.6395	0.670835	1.21924	0.08515	0.917549	no
XLOC_015881	XLOC_015881	Rnf19b	4:129058270-129084526	q1	q2	OK	31.2922	19.6353	-0.672356	-1.21974	0.0853	0.918524	no
XLOC_013329	XLOC_013329	Lrp1b	2:40596772-42653598	q1	q2	OK	2.68684	4.20177	0.645088	1.19993	0.08555	0.920573	no
XLOC_020102	XLOC_020102	Cd79a	7:24897510-24902197	q1	q2	OK	0.876942	0.14223	-2.62426	-1.52602	0.08595	0.922103	no
XLOC_023502	XLOC_023502	Casp4	9:5308859-5336791	q1	q2	OK	0.697978	0.181698	-1.94164	-1.32597	0.08625	0.922103	no
XLOC_020105	XLOC_020105	D930028M14Rik	7:25152456-25156630	q1	q2	OK	0.963334	0.256407	-1.9096	-1.17639	0.08615	0.922103	no
XLOC_004780	XLOC_004780	Rhoj	12:75308312-75401455	q1	q2	OK	2.83788	1.36782	-1.05293	-1.22504	0.08635	0.922103	no
XLOC_004450	XLOC_004450	Btbd17	11:114790668-114795892	q1	q2	OK	13.6538	8.13877	-0.746417	-1.22015	0.08585	0.922103	no
XLOC_006984	XLOC_006984	Gpc6	14:116925314-117979529	q1	q2	OK	3.31471	1.97596	-0.746327	-1.2269	0.08595	0.922103	no
XLOC_017597	XLOC_017597	Gatsl2	5:134099747-134141782	q1	q2	OK	18.5519	28.8141	0.635209	1.19452	0.08635	0.922103	no
XLOC_012911	XLOC_012911	Vstm2l	2:157914652-157944719	q1	q2	OK	44.7945	70.5715	0.655763	1.21249	0.0862	0.922103	no
XLOC_025032	XLOC_025032	Usp11	X:20703908-20720539	q1	q2	OK	40.8808	64.4364	0.656452	1.19973	0.08615	0.922103	no
XLOC_010553	XLOC_010553	Gm1976	17:94750099-94834799	q1	q2	OK	9.57966	16.233	0.76088	1.20716	0.08635	0.922103	no
XLOC_025291	XLOC_025291	Heph	X:96455435-96574485	q1	q2	OK	2.1405	3.75961	0.812634	1.22402	0.0863	0.922103	no
XLOC_015909	XLOC_015909	Tmem200b	4:131921770-131923140	q1	q2	OK	6.96962	3.5629	-0.968027	-1.17606	0.0866	0.922856	no
XLOC_007169	XLOC_007169	5730469M10Rik	14:40993739-41013775	q1	q2	OK	111.54	72.3248	-0.624995	-1.18984	0.0865	0.922856	no
XLOC_012532	XLOC_012532	Chst1	2:92599706-92615252	q1	q2	OK	65.3893	108.513	0.730744	1.19897	0.08655	0.922856	no
XLOC_000404	XLOC_000404	Fam72a	1:131527988-131539872	q1	q2	OK	0.862551	0.297942	-1.53358	-1.28169	0.0867	0.923178	no
XLOC_001898	XLOC_001898	Atp2b1	10:98915151-99026143	q1	q2	OK	59.943	103.756	0.791525	1.2205	0.08675	0.923178	no
XLOC_012331	XLOC_012331	Csrnp3	2:65845766-66031546	q1	q2	OK	8.30692	12.9576	0.641418	1.21288	0.0869	0.9235	no
XLOC_021270	XLOC_021270	Tmem91	7:25669138-25675166	q1	q2	OK	15.125	26.6703	0.818304	1.19244	0.08685	0.9235	no
XLOC_004377	XLOC_004377	C1ql1	11:102939263-102946461	q1	q2	OK	15.9333	8.99962	-0.824109	-1.19944	0.0872	0.925306	no
XLOC_017537	XLOC_017537	Wdr66	5:123253804-123326787	q1	q2	OK	1.31967	2.58672	0.97095	1.1502	0.08725	0.925306	no
XLOC_000285	XLOC_000285	Neu2	1:87574026-87597845	q1	q2	OK	2.06729	4.44262	1.10367	1.23212	0.0872	0.925306	no
XLOC_013649	XLOC_013649	Cd44	2:102811140-102901665	q1	q2	OK	2.544	1.37798	-0.884541	-1.17563	0.08765	0.928271	no
XLOC_004473	XLOC_004473	Mif4gd	11:115607917-115612969	q1	q2	OK	15.4675	8.77118	-0.818402	-1.19407	0.08765	0.928271	no
XLOC_010238	XLOC_010238	Ly6g6d	17:35071347-35074464	q1	q2	OK	1.86514	0.338731	-2.46107	-1.39446	0.08815	0.929518	no
XLOC_006881	XLOC_006881	Nefl	14:68083883-68087745	q1	q2	OK	286.736	173.513	-0.724678	-1.18792	0.08825	0.929518	no
XLOC_006685	XLOC_006685	Grid1	14:34820135-35581115	q1	q2	OK	13.4174	21.1428	0.656066	1.20097	0.08785	0.929518	no
XLOC_011048	XLOC_011048	Ndst1	18:60685962-60713389	q1	q2	OK	17.2088	27.131	0.656798	1.22391	0.0881	0.929518	no
XLOC_018649	XLOC_018649	Gm5567	6:40110252-40248353	q1	q2	OK	10.9886	17.7279	0.690008	1.22041	0.088	0.929518	no
XLOC_014693	XLOC_014693	Ddit4l	3:137623671-137628332	q1	q2	OK	5.12592	8.92751	0.800447	1.19876	0.0882	0.929518	no
XLOC_008075	XLOC_008075	Samd12	15:53461800-53902436	q1	q2	OK	5.53561	10.7307	0.954934	1.18003	0.08795	0.929518	no
XLOC_006246	XLOC_006246	Kif27	13:58287515-58354862	q1	q2	OK	0.795912	1.73486	1.12414	1.2321	0.0882	0.929518	no
XLOC_025404	XLOC_025404	Diap2	X:129749741-130465834	q1	q2	OK	3.01346	4.82186	0.678169	1.19595	0.0885	0.931515	no
XLOC_002210	XLOC_002210	C130030K03Rik	10:49093680-49095843	q1	q2	OK	6.88375	3.91426	-0.814455	-1.16266	0.0886	0.931932	no
XLOC_003408	XLOC_003408	Ifi35	11:101448411-101458701	q1	q2	OK	3.78092	1.65022	-1.19608	-1.23636	0.08885	0.933813	no
XLOC_016171	XLOC_016171	Asph	4:9269316-9669162	q1	q2	OK	82.0236	47.7639	-0.780118	-1.18094	0.0889	0.933813	no
XLOC_000712	XLOC_000712	Xkr4	1:3214481-3671498	q1	q2	OK	4.22242	7.19413	0.768749	1.20776	0.08935	0.937263	no
XLOC_014266	XLOC_014266	Stoml3	3:53488792-53507652	q1	q2	OK	0.482926	1.74592	1.85412	1.25288	0.08935	0.937263	no
XLOC_012002	XLOC_012002	Ucma	2:4976121-4985748	q1	q2	OK	4.76064	1.97098	-1.27225	-1.15869	0.0896	0.939247	no
XLOC_001135	XLOC_001135	Ptprv	1:135108497-135132575	q1	q2	OK	0.622058	1.37409	1.14336	1.2257	0.0897	0.939656	no
XLOC_013891	XLOC_013891	Nkx2-2	2:147177545-147331681	q1	q2	OK	4.09548	1.76948	-1.2107	-1.26254	0.08985	0.93995	no
XLOC_012391	XLOC_012391	Osbpl6	2:76406537-76600647	q1	q2	OK	13.3885	8.64752	-0.630632	-1.17602	0.08985	0.93995	no
XLOC_014963	XLOC_014963	Tlr2	3:83836271-83841608	q1	q2	OK	1.17395	0.499064	-1.23408	-1.19964	0.09035	0.943783	no
XLOC_001959	XLOC_001959	Cpm	10:117629499-117687352	q1	q2	OK	4.36508	2.54378	-0.779035	-1.17121	0.0904	0.943783	no
XLOC_003543	XLOC_003543	Sec14l1	11:117115171-117159268	q1	q2	OK	45.8304	74.5243	0.701406	1.1486	0.0904	0.943783	no
XLOC_018392	XLOC_018392	Cyp3a13	5:137892932-137921619	q1	q2	OK	0.714072	0.277531	-1.36342	-1.20425	0.0905	0.944188	no
XLOC_003743	XLOC_003743	Odz2	11:36006668-36944243	q1	q2	OK	6.46669	10.147	0.649959	1.17553	0.09075	0.945517	no
XLOC_011133	XLOC_011133	Sall3	18:80966358-80986578	q1	q2	OK	1.03198	1.89409	0.876084	1.18803	0.09075	0.945517	no
XLOC_017236	XLOC_017236	Gabrb1	5:71700015-72137244	q1	q2	OK	8.54934	14.1456	0.726466	1.16552	0.09085	0.94592	no
XLOC_001825	XLOC_001825	Tdg	10:82629837-82690650	q1	q2	OK	6.00042	2.84998	-1.07411	-1.15442	0.09155	0.94988	no
XLOC_002015	XLOC_002015	Prim1	10:128015214-128030030	q1	q2	OK	5.93079	3.11909	-0.927102	-1.14816	0.0915	0.94988	no
XLOC_015510	XLOC_015510	N28178	4:42917250-42941607	q1	q2	OK	47.0168	74.4766	0.663612	1.19428	0.0916	0.94988	no
XLOC_007924	XLOC_007924	Acvrl1	15:101128536-101145336	q1	q2	OK	3.61102	6.21121	0.782466	1.21702	0.0913	0.94988	no
XLOC_025287	XLOC_025287	Zc3h12b	X:95711677-95927970	q1	q2	OK	2.13108	3.90677	0.874388	1.19315	0.0916	0.94988	no
XLOC_025306	XLOC_025306	Kif4	X:100626064-100727271	q1	q2	OK	0.344052	0.820561	1.25398	1.2434	0.0914	0.94988	no
XLOC_004342	XLOC_004342	Plekhh3	11:101162678-101171302	q1	q2	OK	8.71325	5.22044	-0.739039	-1.17389	0.0918	0.950038	no
XLOC_025838	XLOC_025838	Xlr3a	X:73086292-73097095	q1	q2	OK	0.377689	1.25279	1.72988	1.27945	0.0918	0.950038	no
XLOC_006880	XLOC_006880	Gnrh1	14:67745228-67749436	q1	q2	OK	0.505	2.9828	2.56231	1.63744	0.0918	0.950038	no
XLOC_000457	XLOC_000457	Kif21b	1:136131400-136178014	q1	q2	OK	9.9396	15.3076	0.622992	1.16313	0.0921	0.951865	no
XLOC_020078	XLOC_020078	Zfp180	7:24081943-24107215	q1	q2	OK	12.7755	19.8104	0.632883	1.18197	0.0921	0.951865	no
XLOC_016559	XLOC_016559	Hpdl	4:116819906-116821508	q1	q2	OK	1.19417	0.442894	-1.43097	-1.17604	0.09255	0.955112	no
XLOC_001839	XLOC_001839	Btbd11	10:85386813-85660292	q1	q2	OK	10.9508	6.69695	-0.709463	-1.15761	0.0925	0.955112	no
XLOC_020365	XLOC_020365	Dbp	7:45705246-45718002	q1	q2	OK	36.7613	67.0513	0.867076	1.18338	0.0926	0.955112	no
XLOC_017985	XLOC_017985	Bend4	5:67392146-67427799	q1	q2	OK	1.37951	2.33403	0.758661	1.15151	0.0927	0.955504	no
XLOC_002202	XLOC_002202	Nr2e1	10:42561970-42583588	q1	q2	OK	2.21868	4.27949	0.947736	1.17176	0.09285	0.955772	no
XLOC_000188	XLOC_000188	Cps1	1:67123065-67230448	q1	q2	OK	0.495919	1.17018	1.23856	1.21927	0.0928	0.955772	no
XLOC_005326	XLOC_005326	1110018G07Rik	12:84918147-84970886	q1	q2	OK	26.9196	41.8203	0.635545	1.18185	0.09295	0.956163	no
XLOC_023991	XLOC_023991	Prss35	9:86743632-86757508	q1	q2	OK	1.76032	0.788583	-1.1585	-1.19984	0.09315	0.957582	no
XLOC_000569	XLOC_000569	Fcgr4	1:171018925-171029761	q1	q2	OK	0.937575	0.219432	-2.09516	-1.37566	0.09325	0.957971	no
XLOC_019645	XLOC_019645	Rassf4	6:116633007-116673836	q1	q2	OK	4.60933	2.71476	-0.763731	-1.16102	0.09355	0.960413	no
XLOC_000660	XLOC_000660	1700047M11Rik	1:182300833-182303289	q1	q2	OK	11.9886	5.50505	-1.12283	-1.20033	0.09365	0.9608	no
XLOC_010799	XLOC_010799	Nedd4l	18:64887755-65217826	q1	q2	OK	15.7975	24.1673	0.613362	1.17653	0.09385	0.960934	no
XLOC_004911	XLOC_004911	Unc79	12:102948858-103183997	q1	q2	OK	7.16479	11.0855	0.629682	1.18426	0.09385	0.960934	no
XLOC_015116	XLOC_015116	Gm129	3:95871521-95891930	q1	q2	OK	10.467	18.1116	0.791074	1.18444	0.0938	0.960934	no
XLOC_001253	XLOC_001253	Mettl11b	1:163702992-163725232	q1	q2	OK	0.168037	0.815025	2.27807	1.38404	0.094	0.961831	no
XLOC_021753	XLOC_021753	Arhgef17	7:100869745-100932161	q1	q2	OK	18.1295	28.4098	0.64805	1.17513	0.09415	0.962727	no
XLOC_008330	XLOC_008330	LOC100502684	15:88889780-88891525	q1	q2	OK	0.343351	1.09365	1.6714	1.1208	0.09445	0.965155	no
XLOC_001890	XLOC_001890	Btg1	10:96617000-96622813	q1	q2	OK	13.4187	8.49782	-0.65908	-1.17374	0.0947	0.9663	no
XLOC_020766	XLOC_020766	Prkcb	7:122289124-122634402	q1	q2	OK	85.9978	147.395	0.777313	1.11542	0.09475	0.9663	no
XLOC_000548	XLOC_000548	Gpr161	1:165295765-165321851	q1	q2	OK	2.03485	4.1491	1.02788	1.20963	0.09475	0.9663	no
XLOC_021968	XLOC_021968	Itpripl2	7:118485110-118491975	q1	q2	OK	1.59516	0.840696	-0.924045	-1.18937	0.09485	0.96668	no
XLOC_014721	XLOC_014721	Gm16233	3:144947560-144975045	q1	q2	OK	0.0793563	1.99609	4.65269	2.67982	0.095	0.967569	no
XLOC_022406	XLOC_022406	Pdgfrl	8:40926232-40990782	q1	q2	OK	1.22492	0.44189	-1.47093	-1.23157	0.09545	0.967678	no
XLOC_007242	XLOC_007242	Tep1	14:50824060-50870554	q1	q2	OK	1.53655	0.853551	-0.848143	-1.15073	0.0953	0.967678	no
XLOC_009786	XLOC_009786	AI314976	17:48410079-48417266	q1	q2	OK	16.083	9.16323	-0.811611	-1.1854	0.0952	0.967678	no
XLOC_008776	XLOC_008776	Tomm70a	16:57121713-57154530	q1	q2	OK	56.1499	87.2622	0.636074	1.15748	0.09535	0.967678	no
XLOC_006216	XLOC_006216	Rnf44	13:54679398-54693960	q1	q2	OK	31.5913	50.2147	0.668583	1.21854	0.09535	0.967678	no
XLOC_021676	XLOC_021676	Arnt2	7:84246277-84361673	q1	q2	OK	43.1412	69.086	0.679326	1.18276	0.09515	0.967678	no
XLOC_023221	XLOC_023221	Zswim4	8:84210941-84237042	q1	q2	OK	4.61279	7.42563	0.686875	1.16553	0.09545	0.967679	no
XLOC_006932	XLOC_006932	Epsti1	14:77904238-78002656	q1	q2	OK	1.1211	0.412024	-1.44412	-1.16108	0.09605	0.970423	no
XLOC_010600	XLOC_010600	Ttr	18:20665249-20674326	q1	q2	OK	628.712	324.69	-0.953336	-1.18139	0.09625	0.970423	no
XLOC_009929	XLOC_009929	Adcyap1	17:93199421-93205491	q1	q2	OK	9.28642	5.53065	-0.747673	-1.1322	0.09615	0.970423	no
XLOC_024466	XLOC_024466	Tmem25	9:44793778-44799216	q1	q2	OK	35.3758	22.6828	-0.641161	-1.1888	0.09635	0.970423	no
XLOC_017023	XLOC_017023	Cacna2d1	5:15934690-16374511	q1	q2	OK	22.8999	36.6676	0.679163	1.13482	0.09635	0.970423	no
XLOC_008568	XLOC_008568	Tmem191c	16:17276299-17278661	q1	q2	OK	31.7495	51.2005	0.689426	1.18068	0.0963	0.970423	no
XLOC_007297	XLOC_007297	Jph4	14:55106825-55116935	q1	q2	OK	72.5677	118.168	0.703443	1.17725	0.09635	0.970423	no
XLOC_013344	XLOC_013344	Rprm	2:54084092-54085552	q1	q2	OK	26.5796	44.2999	0.736983	1.17139	0.09625	0.970423	no
XLOC_022363	XLOC_022363	Chrnb3	8:27368710-27399730	q1	q2	OK	0.395432	0.947369	1.2605	1.19219	0.0963	0.970423	no
XLOC_007961	XLOC_007961	Hoxc5	15:103014007-103017429	q1	q2	OK	0.704313	0	#NAME?	#NAME?	0.09595	0.970423	no
XLOC_015398	XLOC_015398	Ubxn2b	4:6191104-6219788	q1	q2	OK	5.58278	8.86063	0.666426	1.18096	0.0966	0.971671	no
XLOC_004779	XLOC_004779	Dbpht2	12:74297473-74300468	q1	q2	OK	9.90024	16.5441	0.740781	1.16949	0.09655	0.971671	no
XLOC_003683	XLOC_003683	Meis1	11:18880427-19018969	q1	q2	OK	6.25244	3.4723	-0.848526	-1.19044	0.0972	0.972087	no
XLOC_024202	XLOC_024202	Mobp	9:120149741-120176091	q1	q2	OK	221.233	131.262	-0.753114	-1.12343	0.0976	0.972087	no
XLOC_016398	XLOC_016398	Whrn	4:63414909-63495951	q1	q2	OK	20.207	12.2808	-0.718456	-1.22706	0.09765	0.972087	no
XLOC_017738	XLOC_017738	Pan3	5:147430579-147548501	q1	q2	OK	13.1079	8.4101	-0.640238	-1.17663	0.0975	0.972087	no
XLOC_013281	XLOC_013281	Garnl3	2:32986365-33087204	q1	q2	OK	33.8231	21.9012	-0.627	-1.15923	0.0975	0.972087	no
XLOC_022584	XLOC_022584	Rnf150	8:82863355-83091271	q1	q2	OK	7.27889	11.154	0.615776	1.15909	0.09715	0.972087	no
XLOC_009318	XLOC_009318	Rps6ka2	17:7170114-7303315	q1	q2	OK	14.646	22.5001	0.619428	1.15735	0.09685	0.972087	no
XLOC_001837	XLOC_001837	Ric8b	10:84917615-85016447	q1	q2	OK	17.2913	26.5744	0.619996	1.15473	0.09765	0.972087	no
XLOC_022088	XLOC_022088	Chst15	7:132236254-132318291	q1	q2	OK	8.89793	14.0103	0.654945	1.16493	0.0971	0.972087	no
XLOC_019903	XLOC_019903	Nat14	7:4922250-4925006	q1	q2	OK	29.8333	47.4024	0.66804	1.17501	0.09705	0.972087	no
XLOC_018840	XLOC_018840	Lrrtm4	6:80018876-80024932	q1	q2	OK	5.41207	8.9255	0.721752	1.14809	0.0976	0.972087	no
XLOC_000676	XLOC_000676	Slc30a10	1:185447115-185468762	q1	q2	OK	3.95548	6.5816	0.734586	1.17951	0.09725	0.972087	no
XLOC_008011	XLOC_008011	Fam105a	15:27655070-27681542	q1	q2	OK	4.9205	8.39635	0.770958	1.17102	0.097	0.972087	no
XLOC_005740	XLOC_005740	Rgs14	13:55369731-55384687	q1	q2	OK	15.8201	27.3211	0.788258	1.19562	0.09735	0.972087	no
XLOC_010507	XLOC_010507	Cdc42ep3	17:79334024-79358020	q1	q2	OK	5.81151	10.188	0.809886	1.16959	0.09745	0.972087	no
XLOC_024445	XLOC_024445	Oaf	9:43123938-43239816	q1	q2	OK	3.25617	5.93434	0.865911	1.16625	0.09695	0.972087	no
XLOC_015593	XLOC_015593	Hsdl2	4:59581562-59618694	q1	q2	OK	21.0476	13.2341	-0.669396	-1.15568	0.098	0.974313	no
XLOC_002502	XLOC_002502	Nts	10:102481755-102490418	q1	q2	OK	5.7468	10.9373	0.928423	1.19513	0.098	0.974313	no
XLOC_014907	XLOC_014907	Plch1	3:63696233-63850991	q1	q2	OK	4.46057	2.63849	-0.757515	-1.18709	0.09815	0.974548	no
XLOC_010805	XLOC_010805	Sec11c	18:65800577-65817657	q1	q2	OK	117.595	75.776	-0.63402	-1.17359	0.09815	0.974548	no
XLOC_006143	XLOC_006143	Nrn1	13:36725624-36734454	q1	q2	OK	112.156	71.6636	-0.646198	-1.1542	0.0984	0.976402	no
XLOC_023008	XLOC_023008	Fnta	8:25998721-26015601	q1	q2	OK	44.1974	28.4218	-0.636962	-1.17854	0.09855	0.977261	no
XLOC_012890	XLOC_012890	Procr	2:155751216-155755478	q1	q2	OK	0.82682	0.240819	-1.77962	-1.30665	0.0987	0.977491	no
XLOC_014213	XLOC_014213	Cldn11	3:31149919-31164326	q1	q2	OK	150	95.8635	-0.645912	-1.15269	0.0987	0.977491	no
XLOC_025039	XLOC_025039	Agtr2	X:21484625-21488831	q1	q2	OK	0.70188	0.252798	-1.47324	-1.22163	0.0991	0.980823	no
XLOC_008536	XLOC_008536	Shisa9	16:11984112-12270904	q1	q2	OK	12.3872	19.2664	0.637244	1.16501	0.0993	0.982172	no
XLOC_017389	XLOC_017389	Lrrc8c	5:105519470-105608954	q1	q2	OK	3.64808	6.36954	0.804053	1.17953	0.09945	0.983025	no
XLOC_002372	XLOC_002372	Pcsk4	10:80321282-80329473	q1	q2	OK	1.68912	3.23643	0.938128	1.1331	0.09985	0.985715	no
XLOC_013858	XLOC_013858	Prokr2	2:132370328-132385447	q1	q2	OK	0.618499	1.42585	1.20498	1.19305	0.0998	0.985715	no
XLOC_019646	XLOC_019646	Tmem72	6:116692724-116716758	q1	q2	OK	1.2282	0.538853	-1.18858	-1.18688	0.1002	0.987214	no
XLOC_005475	XLOC_005475	Dnahc11	12:117843860-118199043	q1	q2	OK	0.754496	0.355671	-1.08497	-1.23951	0.1004	0.987214	no
XLOC_005932	XLOC_005932	Ankrd55	13:112288450-112384002	q1	q2	OK	4.12631	2.17116	-0.926387	-1.10641	0.10035	0.987214	no
XLOC_004705	XLOC_004705	Arhgap5	12:52516076-52567852	q1	q2	OK	34.713	21.7921	-0.671669	-1.15873	0.1002	0.987214	no
XLOC_008725	XLOC_008725	Igsf11	16:38902344-39027159	q1	q2	OK	9.83671	15.3503	0.642015	1.15754	0.10015	0.987214	no
XLOC_023040	XLOC_023040	Sgcz	8:37522553-38661508	q1	q2	OK	0.594092	1.3606	1.19548	1.16779	0.10045	0.987214	no
XLOC_019497	XLOC_019497	Actg2	6:83512908-83536251	q1	q2	OK	0.101443	0.743195	2.87307	1.67534	0.1004	0.987214	no
XLOC_024211	XLOC_024211	Vipr1	9:121642715-121672954	q1	q2	OK	3.22305	5.43915	0.754955	1.15835	0.10065	0.987645	no
XLOC_005169	XLOC_005169	Cdhr3	12:33033795-33092875	q1	q2	OK	0.481951	1.22237	1.34273	1.23177	0.10075	0.987645	no
XLOC_000278	XLOC_000278	Prss56	1:87183492-87188404	q1	q2	OK	0.0670765	0.864383	3.68779	2.03095	0.10075	0.987645	no
XLOC_020136	XLOC_020136	Mir1191	7:27205535-27205655	q1	q2	OK	0	8.73641	inf	#NAME?	0.1007	0.987645	no
XLOC_017909	XLOC_017909	Htra3	5:35652032-35679782	q1	q2	OK	2.95295	1.50993	-0.967679	-1.19011	0.10125	0.990101	no
XLOC_002681	XLOC_002681	Gal3st1	11:3983635-3999328	q1	q2	OK	13.0101	7.58294	-0.778803	-1.1654	0.10115	0.990101	no
XLOC_003716	XLOC_003716	Acyp2	11:30505991-30649396	q1	q2	OK	38.8739	22.7814	-0.770946	-1.16023	0.10135	0.990101	no
XLOC_004936	XLOC_004936	2810011L19Rik	12:105336593-105383932	q1	q2	OK	12.6159	7.88157	-0.678691	-1.13387	0.1013	0.990101	no
XLOC_017605	XLOC_017605	Stx1a	5:135023571-135051099	q1	q2	OK	60.2632	103.651	0.782389	1.1741	0.1014	0.990101	no
XLOC_021984	XLOC_021984	Zp2	7:120132360-120145290	q1	q2	OK	0.0603314	0.703084	3.54272	1.99174	0.10145	0.990101	no
XLOC_006894	XLOC_006894	Mir320	14:70443509-70443591	q1	q2	OK	40.8636	0	#NAME?	#NAME?	0.10115	0.990101	no
XLOC_002274	XLOC_002274	Reep3	10:67009188-67096988	q1	q2	OK	12.6166	8.04243	-0.649617	-1.14746	0.10155	0.99045	no
XLOC_019720	XLOC_019720	Ntf3	6:126101411-126166744	q1	q2	OK	2.89312	1.21654	-1.24984	-1.12379	0.1025	0.991562	no
XLOC_002429	XLOC_002429	Aldh1l2	10:83487446-83534140	q1	q2	OK	2.13238	1.18966	-0.84192	-1.15176	0.10245	0.991562	no
XLOC_021674	XLOC_021674	9930013L23Rik	7:83932856-84086505	q1	q2	OK	3.71892	2.23845	-0.732386	-1.16094	0.10245	0.991562	no
XLOC_005908	XLOC_005908	Sgtb	13:104109789-104141452	q1	q2	OK	32.8288	49.6568	0.597031	1.13002	0.1018	0.991562	no
XLOC_023300	XLOC_023300	Cmtm4	8:104348190-104395807	q1	q2	OK	19.0335	28.9021	0.60263	1.12306	0.10245	0.991562	no
XLOC_004091	XLOC_004091	Nlk	11:78567167-78697425	q1	q2	OK	15.6866	23.9438	0.61012	1.14252	0.1024	0.991562	no
XLOC_012295	XLOC_012295	Mbd5	2:48949507-49317069	q1	q2	OK	6.77073	10.3388	0.610687	1.14093	0.1019	0.991562	no
XLOC_011703	XLOC_011703	Fads2	19:10064163-10101503	q1	q2	OK	65.9143	100.833	0.613306	1.15928	0.1022	0.991562	no
XLOC_004170	XLOC_004170	Akap1	11:88830791-88864586	q1	q2	OK	11.2887	17.3367	0.61895	1.15134	0.10225	0.991562	no
XLOC_004577	XLOC_004577	Dtnb	12:3572390-3781398	q1	q2	OK	17.4532	27.0228	0.630683	1.16743	0.1022	0.991562	no
XLOC_017782	XLOC_017782	Grm3	5:9485235-9725352	q1	q2	OK	12.4135	19.2238	0.630983	1.16425	0.10205	0.991562	no
XLOC_007648	XLOC_007648	Mal2	15:54571365-54602846	q1	q2	OK	39.0737	62.9717	0.688508	1.10222	0.1021	0.991562	no
XLOC_000454	XLOC_000454	Tnnt2	1:135836385-135852261	q1	q2	OK	2.87074	5.95466	1.0526	1.0797	0.10205	0.991562	no
XLOC_004785	XLOC_004785	Hspa2	12:76404175-76406938	q1	q2	OK	14.9008	23.7674	0.673591	1.15869	0.10295	0.995291	no
XLOC_009161	XLOC_009161	Col8a1	16:57624255-57754737	q1	q2	OK	1.23531	0.559753	-1.14201	-1.19498	0.10305	0.995633	no
XLOC_013766	XLOC_013766	Lcmt2	2:121137291-121140698	q1	q2	OK	3.96681	2.20857	-0.844864	-1.16817	0.10325	0.995694	no
XLOC_022092	XLOC_022092	Fam53b	7:132712083-132813196	q1	q2	OK	10.2372	6.54045	-0.646362	-1.12993	0.10315	0.995694	no
XLOC_010792	XLOC_010792	Htr4	18:62324203-62467802	q1	q2	OK	0.665534	1.37522	1.04708	1.14694	0.10325	0.995694	no
XLOC_005952	XLOC_005952	Emb	13:117220572-117286819	q1	q2	OK	12.4114	7.4028	-0.745528	-1.14112	0.1036	0.995955	no
XLOC_018812	XLOC_018812	Krcc1	6:71272018-71285319	q1	q2	OK	14.3925	8.91004	-0.691809	-1.10241	0.1036	0.995955	no
XLOC_002524	XLOC_002524	Trhde	10:114398820-114801370	q1	q2	OK	6.12938	3.85623	-0.668552	-1.1353	0.1034	0.995955	no
XLOC_018369	XLOC_018369	Ap1s1	5:137034993-137046060	q1	q2	OK	148.145	234.556	0.662929	1.15204	0.10355	0.995955	no
XLOC_003764	XLOC_003764	Gm4926	11:46636505-46645006	q1	q2	OK	0.169989	0.910142	2.42065	1.46528	0.10345	0.995955	no
XLOC_013042	XLOC_013042	Gm14403	2:177498225-177512311	q1	q2	OK	2.78641	1.46509	-0.92742	-1.18371	0.10375	0.996776	no
XLOC_014283	XLOC_014283	Rnf13	3:57736065-57835233	q1	q2	OK	74.8562	48.0182	-0.640541	-1.10569	0.10395	0.996834	no
XLOC_009556	XLOC_009556	Slc37a1	17:31295482-31350709	q1	q2	OK	1.74534	3.37344	0.950713	1.20039	0.10395	0.996834	no
XLOC_019064	XLOC_019064	Cd163	6:124304650-124330527	q1	q2	OK	0.404878	0.915572	1.17719	1.16587	0.1039	0.996834	no
XLOC_007556	XLOC_007556	Lmbrd2	15:9140569-9197450	q1	q2	OK	9.48527	14.8875	0.650339	1.14059	0.10415	0.998131	no
XLOC_016747	XLOC_016747	Sepn1	4:134537891-134552166	q1	q2	OK	11.3944	7.26282	-0.649717	-1.11926	0.1044	0.998665	no
XLOC_005245	XLOC_005245	L2hgdh	12:69690435-69724874	q1	q2	OK	5.9771	9.42225	0.656628	1.10406	0.1044	0.998665	no
XLOC_001446	XLOC_001446	Iyd	10:3540278-3554877	q1	q2	OK	0.762684	1.83745	1.26855	1.15053	0.1044	0.998665	no
XLOC_006862	XLOC_006862	Kif13b	14:64652530-64806296	q1	q2	OK	9.91228	6.31519	-0.650391	-1.16302	0.1047	0.998774	no
XLOC_019265	XLOC_019265	Gpr37	6:25668522-25689980	q1	q2	OK	36.5959	23.7015	-0.626703	-1.13562	0.1048	0.998774	no
XLOC_020582	XLOC_020582	Stim1	7:102267823-102436860	q1	q2	OK	25.5585	38.5069	0.59131	1.12903	0.1048	0.998774	no
XLOC_006155	XLOC_006155	Mak	13:41025119-41079706	q1	q2	OK	0.643687	1.46492	1.18639	1.1391	0.1048	0.998774	no
XLOC_023013	XLOC_023013	Got1l1	8:27197458-27202547	q1	q2	OK	0.104425	0.950887	3.18681	1.83015	0.10475	0.998774	no
XLOC_005147	XLOC_005147	Allc	12:28553754-28582483	q1	q2	OK	0.0957974	0.893453	3.22133	1.84443	0.1047	0.998774	no
XLOC_023416	XLOC_023416	Zcchc14	8:121598702-121651933	q1	q2	OK	14.3512	21.644	0.592799	1.1303	0.1049	0.999109	no
XLOC_010827	XLOC_010827	Ccdc68	18:69925558-69969484	q1	q2	OK	0.0910937	0.895531	3.29732	1.83859	0.105	0.999444	no
XLOC_001412	XLOC_001412	Prox1	1:190121774-190217279	q1	q2	OK	5.90442	3.48099	-0.762297	-1.15449	0.1051	0.999638	no
XLOC_007488	XLOC_007488	Klf12	14:99870631-100149796	q1	q2	OK	4.85147	7.63633	0.65446	1.13542	0.10515	0.999638	no
XLOC_017853	XLOC_017853	Cnpy1	5:28205462-28237873	q1	q2	OK	5.90946	0.011222	-9.04055	-2.25039	0.22605	0.999686	no
XLOC_003319	XLOC_003319	Hoxb5	11:96303511-96306121	q1	q2	OK	6.7453	0.0137712	-8.93608	-2.24916	0.22605	0.999686	no
XLOC_019382	XLOC_019382	Hoxa5	6:52165673-52213597	q1	q2	OK	4.37484	0.0139274	-8.29516	-2.0442	0.30645	0.999686	no
XLOC_003677	XLOC_003677	Gm12663	11:16634081-16636140	q1	q2	OK	3.2774	0.012563	-8.02723	-2.00073	0.22605	0.999686	no
XLOC_024434	XLOC_024434	Crtam	9:40972797-41004586	q1	q2	OK	10.4546	0.0418071	-7.96618	-4.00889	0.1752	0.999686	no
XLOC_015193	XLOC_015193	Chi3l7	3:106016918-106032814	q1	q2	OK	1.92334	0.0178463	-6.75184	-1.70703	0.22605	0.999686	no
XLOC_025444	XLOC_025444	Nrk	X:138914429-139009092	q1	q2	OK	1.44556	0.0145809	-6.6314	-3.45434	0.13335	0.999686	no
XLOC_013156	XLOC_013156	Pax8	2:24420559-24475566	q1	q2	OK	0.903412	0.0100351	-6.49226	-1.59021	0.22605	0.999686	no
XLOC_022652	XLOC_022652	Irx5	8:92357795-92361456	q1	q2	OK	0.868922	0.0106002	-6.35706	-1.56694	0.22605	0.999686	no
XLOC_019381	XLOC_019381	Hoxa4	6:52165673-52213597	q1	q2	OK	2.435	0.0327295	-6.21718	-2.60554	0.4508	0.999686	no
XLOC_011907	XLOC_011907	Lbx1	19:45233727-45235236	q1	q2	OK	2.49967	0.035213	-6.14948	-1.64937	0.22605	0.999686	no
XLOC_001963	XLOC_001963	Il22	10:118204963-118210047	q1	q2	OK	3.04452	0.0489686	-5.95822	-2.73431	0.2246	0.999686	no
XLOC_012815	XLOC_012815	Cst7	2:150570414-150578944	q1	q2	OK	1.82449	0.0297391	-5.93899	-1.56634	0.22605	0.999686	no
XLOC_010846	XLOC_010846	Skor2	18:76856404-76900342	q1	q2	OK	1.28214	0.0238175	-5.75039	-2.77168	0.1752	0.999686	no
XLOC_018075	XLOC_018075	Cxcl9	5:92321330-92328079	q1	q2	OK	1.44253	0.0321221	-5.48889	-2.73176	0.14625	0.999686	no
XLOC_011292	XLOC_011292	Ms4a4b	19:11443557-11463549	q1	q2	OK	0.943972	0.0220641	-5.41897	-1.38473	0.22605	0.999686	no
XLOC_003321	XLOC_003321	Hoxb4	11:96318266-96321638	q1	q2	OK	0.843949	0.0197391	-5.41802	-2.50057	0.2075	0.999686	no
XLOC_011164	XLOC_011164	Cabp2	19:4082487-4087340	q1	q2	OK	1.12846	0.0280251	-5.33149	-0.721289	0.46645	0.999686	no
XLOC_005406	XLOC_005406	Serpina1b	12:103728155-103738189	q1	q2	OK	1.4215	0.0354842	-5.3241	-2.3298	0.2247	0.999686	no
XLOC_012381	XLOC_012381	Hoxd4	2:74710043-74748271	q1	q2	OK	0.719954	0.0184101	-5.28933	-2.17217	0.40445	0.999686	no
XLOC_008159	XLOC_008159	Ly6c2	15:75108160-75111949	q1	q2	OK	1.51397	0.0389115	-5.282	-1.43314	0.22605	0.999686	no
XLOC_014344	XLOC_014344	Fgg	3:83007895-83015049	q1	q2	OK	1.25344	0.0328534	-5.25371	-2.29057	0.2247	0.999686	no
XLOC_018461	XLOC_018461	Cyp3a11	5:145854606-145879854	q1	q2	OK	0.894699	0.0234505	-5.25371	-2.2442	0.2247	0.999686	no
XLOC_009651	XLOC_009651	LOC68395	17:35394104-35397805	q1	q2	OK	1.03061	0.0270506	-5.2517	-1.36784	0.2261	0.999686	no
XLOC_020279	XLOC_020279	Nkg7	7:43437137-43438246	q1	q2	OK	1.33045	0.0381483	-5.12415	-1.38966	0.22645	0.999686	no
XLOC_024471	XLOC_024471	Cd3g	9:44969571-44980431	q1	q2	OK	0.907859	0.0284002	-4.9985	-1.29655	0.22675	0.999686	no
XLOC_015383	XLOC_015383	Gm15577	3:156561793-157316447	q1	q2	OK	0.950457	0.0319176	-4.8962	-0.191199	0.45465	0.999686	no
XLOC_004126	XLOC_004126	Ccl5	11:83525777-83530518	q1	q2	OK	9.85334	0.352761	-4.80385	-3.15512	0.1056	0.999686	no
XLOC_014978	XLOC_014978	Mab21l2	3:86224689-86782694	q1	q2	OK	4.49447	0.175953	-4.67489	-0.953712	0.2039	0.999686	no
XLOC_018136	XLOC_018136	Gbp10	5:105215698-105239533	q1	q2	OK	0.715903	0.0280625	-4.67305	-2.38859	0.13335	0.999686	no
XLOC_011626	XLOC_011626	Ctsw	19:5465239-5468498	q1	q2	OK	0.943011	0.045284	-4.3802	-2.09934	0.20755	0.999686	no
XLOC_024472	XLOC_024472	Cd3e	9:44998742-45009590	q1	q2	OK	0.701873	0.0351681	-4.31887	-1.86082	0.2259	0.999686	no
XLOC_005407	XLOC_005407	Serpina1d	12:103763586-103773633	q1	q2	OK	1.00145	0.053808	-4.21812	-1.86763	0.14325	0.999686	no
XLOC_003296	XLOC_003296	A730090H04Rik	11:95140446-95159047	q1	q2	OK	0.834625	0.0478987	-4.12307	-1.9057	0.3516	0.999686	no
XLOC_003220	XLOC_003220	Ccl4	11:83662583-83664683	q1	q2	OK	0.878773	0.0508695	-4.11062	-1.14436	0.23095	0.999686	no
XLOC_010962	XLOC_010962	2010001M09Rik	18:35647264-35649367	q1	q2	OK	1.55586	0.0993439	-3.96914	-1.94792	0.17655	0.999686	no
XLOC_016385	XLOC_016385	Mup3	4:62083475-62087312	q1	q2	OK	0.905727	0.0660419	-3.77762	-1.7983	0.2101	0.999686	no
XLOC_025528	XLOC_025528	Smpx	X:157698972-157752591	q1	q2	OK	2.05279	0.156059	-3.71742	-1.94395	0.2602	0.999686	no
XLOC_024337	XLOC_024337	Acp5	9:22126726-22135746	q1	q2	OK	0.797958	0.0607861	-3.7145	-1.30598	0.21515	0.999686	no
XLOC_010515	XLOC_010515	Gm10190	17:80307406-80388689	q1	q2	OK	3.86239	0.294278	-3.71425	-0.993283	0.26385	0.999686	no
XLOC_002525	XLOC_002525	Tph2	10:115078640-115251493	q1	q2	OK	4.8452	0.370256	-3.70996	-1.32332	0.2796	0.999686	no
XLOC_011598	XLOC_011598	Rhod	19:4425456-4477143	q1	q2	OK	2.08374	0.179053	-3.54071	-0.602383	0.29595	0.999686	no
XLOC_021363	XLOC_021363	Hamp	7:30942367-30956803	q1	q2	OK	1.28161	0.120361	-3.41252	-0.193586	0.47305	0.999686	no
XLOC_015607	XLOC_015607	Orm1	4:63344565-63348162	q1	q2	OK	0.803833	0.0766142	-3.39121	-1.58618	0.22905	0.999686	no
XLOC_012904	XLOC_012904	Gm1332	2:157087054-157096481	q1	q2	OK	1.08379	0.106619	-3.34555	-1.66353	0.21695	0.999686	no
XLOC_019220	XLOC_019220	1700019G24Rik	6:5725638-6028039	q1	q2	OK	0.744323	0.0743741	-3.32306	-0.144544	0.3331	0.999686	no
XLOC_003832	XLOC_003832	Ccdc69	11:55049737-55078131	q1	q2	OK	0.946311	0.0958261	-3.30382	-1.82329	0.11485	0.999686	no
XLOC_014279	XLOC_014279	Mab21l1	3:55625197-56183701	q1	q2	OK	10.2865	1.05957	-3.2792	-0.599637	0.1828	0.999686	no
XLOC_014091	XLOC_014091	Zbp1	2:173206611-173218922	q1	q2	OK	1.98433	0.208358	-3.25152	-1.9701	0.25155	0.999686	no
XLOC_003776	XLOC_003776	Tgtp2	11:49037659-49135387	q1	q2	OK	0.834443	0.0892595	-3.22474	-1.40779	0.28785	0.999686	no
XLOC_010457	XLOC_010457	A930002H24Rik	17:63864011-64139496	q1	q2	OK	0.775625	0.0843151	-3.2015	-0.321343	0.36945	0.999686	no
XLOC_001116	XLOC_001116	Gm19461	1:133246096-133303435	q1	q2	OK	2.43988	0.280834	-3.11902	-0.630082	0.3396	0.999686	no
XLOC_015202	XLOC_015202	Prok1	3:107235530-107239707	q1	q2	OK	0.920078	0.109658	-3.06874	-0.983569	0.2605	0.999686	no
XLOC_011991	XLOC_011991	Acbd7	2:3336167-3340997	q1	q2	OK	1.15129	0.139836	-3.04145	-1.53636	0.22745	0.999686	no
XLOC_024773	XLOC_024773	Ccrl1	9:104063702-104127646	q1	q2	OK	0.783654	0.0961646	-3.02664	-0.557748	0.41575	0.999686	no
XLOC_018076	XLOC_018076	Cxcl10	5:92331840-92414628	q1	q2	OK	3.22051	0.407782	-2.98142	-1.32567	0.41725	0.999686	no
XLOC_021527	XLOC_021527	Saa3	7:46711997-46715676	q1	q2	OK	0.914082	0.131668	-2.79542	-1.34273	0.2988	0.999686	no
XLOC_016824	XLOC_016824	6330411D24Rik	4:142830129-143073809	q1	q2	OK	0.997394	0.146155	-2.77067	-1.2231	0.15665	0.999686	no
XLOC_010235	XLOC_010235	Ng23	17:35016578-35028016	q1	q2	OK	2.70835	0.402331	-2.75096	-0.991918	0.29275	0.999686	no
XLOC_010111	XLOC_010111	A930017K11Rik	17:25946382-25965505	q1	q2	OK	2.51507	0.393103	-2.67762	-0.964986	0.39405	0.999686	no
XLOC_001671	XLOC_001671	2310015B20Rik	10:70204666-70219711	q1	q2	OK	2.77207	0.455686	-2.60485	-1.39436	0.121	0.999686	no
XLOC_016022	XLOC_016022	4930455G09Rik	4:142018012-142028997	q1	q2	OK	1.69876	0.296551	-2.51813	-1.47952	0.1698	0.999686	no
XLOC_012529	XLOC_012529	1700029I15Rik	2:92382917-92383603	q1	q2	OK	1.63781	0.285912	-2.51813	-1.41556	0.2586	0.999686	no
XLOC_012687	XLOC_012687	Fgf7	2:125859217-126146251	q1	q2	OK	1.57442	0.275484	-2.51478	-0.873298	0.4079	0.999686	no
XLOC_015171	XLOC_015171	Tshb	3:102777397-102782714	q1	q2	OK	1.47132	0.262375	-2.48741	-1.20823	0.2574	0.999686	no
XLOC_000896	XLOC_000896	2810408I11Rik	1:64679868-64690659	q1	q2	OK	0.714015	0.130449	-2.45247	-1.06464	0.16675	0.999686	no
XLOC_001764	XLOC_001764	Grin3b	10:79970723-79984330	q1	q2	OK	0.726791	0.141139	-2.36442	-0.366283	0.37565	0.999686	no
XLOC_023264	XLOC_023264	4933436C20Rik	8:92326032-92356120	q1	q2	OK	0.75213	0.153698	-2.29089	-1.3891	0.1136	0.999686	no
XLOC_025593	XLOC_025593	Glod5	X:8004200-8018492	q1	q2	OK	0.952146	0.198292	-2.26356	-1.25507	0.2006	0.999686	no
XLOC_017519	XLOC_017519	Myl2	5:122100979-122106854	q1	q2	OK	0.732769	0.154617	-2.24466	-0.96795	0.19025	0.999686	no
XLOC_020881	XLOC_020881	Gm16201	7:139950439-139992488	q1	q2	OK	0.768455	0.162698	-2.23976	-0.946312	0.3781	0.999686	no
XLOC_024473	XLOC_024473	Gm10684	9:45079182-45135606	q1	q2	OK	0.696044	0.14832	-2.23046	-0.156953	0.33645	0.999686	no
XLOC_009543	XLOC_009543	Gm10045	17:29308137-29308620	q1	q2	OK	0.721864	0.154094	-2.22791	-1.10089	0.2835	0.999686	no
XLOC_003475	XLOC_003475	Apoh	11:108395296-108414396	q1	q2	OK	0.871794	0.186293	-2.22641	-1.35581	0.11395	0.999686	no
XLOC_005571	XLOC_005571	Hist1h4h	13:23522203-23560707	q1	q2	OK	2.49496	0.576371	-2.11395	-1.03073	0.27935	0.999686	no
XLOC_015087	XLOC_015087	Gm9154	3:94604407-94604784	q1	q2	OK	1.11223	0.265119	-2.06874	-1.10794	0.29565	0.999686	no
XLOC_001003	XLOC_001003	Gm19582	1:87853240-87944489	q1	q2	OK	1.45416	0.35372	-2.03951	-0.199539	0.406	0.999686	no
XLOC_014910	XLOC_014910	Gm20031	3:63942335-63964733	q1	q2	OK	0.803681	0.198395	-2.01825	-0.255524	0.3842	0.999686	no
XLOC_005100	XLOC_005100	LOC100862277	12:8771395-8793688	q1	q2	OK	3.14592	0.787273	-1.99855	-1.14759	0.1289	0.999686	no
XLOC_023756	XLOC_023756	Amica1	9:45079182-45135606	q1	q2	OK	0.834387	0.209972	-1.99052	-0.17535	0.3184	0.999686	no
XLOC_001660	XLOC_001660	Ctnna3	10:63430097-65003667	q1	q2	OK	1.73457	0.461893	-1.90895	-0.770594	0.37785	0.999686	no
XLOC_021362	XLOC_021362	Hamp2	7:30922371-30924181	q1	q2	OK	1.40518	0.382102	-1.87873	-0.999591	0.2902	0.999686	no
XLOC_018740	XLOC_018740	Gm15051	6:52158523-52162289	q1	q2	OK	3.0635	0.852733	-1.84501	-1.22382	0.10625	0.999686	no
XLOC_005691	XLOC_005691	A830005F24Rik	13:48513569-48514862	q1	q2	OK	1.69161	0.470936	-1.84479	-1.24951	0.11735	0.999686	no
XLOC_015694	XLOC_015694	0610043K17Rik	4:101346523-101399185	q1	q2	OK	0.976126	0.272171	-1.84255	-0.420977	0.55865	0.999686	no
XLOC_018614	XLOC_018614	Akr1b8	6:34354163-34368454	q1	q2	OK	0.853869	0.239215	-1.83571	-1.26727	0.1081	0.999686	no
XLOC_006463	XLOC_006463	Gm8680	13:104287872-104494763	q1	q2	OK	1.13465	0.324326	-1.80674	-0.325567	0.55465	0.999686	no
XLOC_009600	XLOC_009600	H2-Oa	17:34083842-34095309	q1	q2	OK	1.30673	0.373897	-1.80525	-1.23158	0.12305	0.999686	no
XLOC_012332	XLOC_012332	Gm13629	2:66440879-66634952	q1	q2	OK	5.81775	1.71536	-1.76195	-1.00605	0.169	0.999686	no
XLOC_010239	XLOC_010239	Ly6g6f	17:35080537-35085595	q1	q2	OK	1.05156	0.315603	-1.73635	-1.19902	0.11165	0.999686	no
XLOC_007723	XLOC_007723	Scx	15:76380512-76477269	q1	q2	OK	5.13644	1.57414	-1.7062	-0.397363	0.53655	0.999686	no
XLOC_022498	XLOC_022498	Hapln4	8:70081387-70120844	q1	q2	OK	44.6316	13.7863	-1.69483	-1.02884	0.1478	0.999686	no
XLOC_016641	XLOC_016641	1700125G02Rik	4:124881784-124917800	q1	q2	OK	0.699486	0.220314	-1.66673	-0.177299	0.4965	0.999686	no
XLOC_011495	XLOC_011495	Gm19639	19:45544750-45546346	q1	q2	OK	1.3937	0.443241	-1.65276	-1.12638	0.1378	0.999686	no
XLOC_010044	XLOC_010044	Tnfrsf12a	17:23660522-23677449	q1	q2	OK	11.9089	3.80076	-1.64768	-0.690436	0.57115	0.999686	no
XLOC_010977	XLOC_010977	Dnd1	18:36760238-36766214	q1	q2	OK	0.900306	0.289418	-1.63726	-0.531294	0.4772	0.999686	no
XLOC_008733	XLOC_008733	Mir3470b	16:43980349-44027945	q1	q2	OK	11.3411	3.69855	-1.61653	-0.371429	0.5298	0.999686	no
XLOC_021583	XLOC_021583	Mir344	7:61705849-61927574	q1	q2	OK	29.5537	9.63799	-1.61653	-0.252944	0.51315	0.999686	no
XLOC_008511	XLOC_008511	Gm5480	16:5007287-5008309	q1	q2	OK	1.4474	0.472098	-1.6163	-0.617036	0.3156	0.999686	no
XLOC_016170	XLOC_016170	Gm8273	4:8646963-8647547	q1	q2	OK	1.09227	0.357313	-1.61207	-0.931162	0.1862	0.999686	no
XLOC_020321	XLOC_020321	Aspdh	7:44465434-44467751	q1	q2	OK	1.32	0.440737	-1.58255	-1.20903	0.1153	0.999686	no
XLOC_001436	XLOC_001436	G0s2	1:193272159-193273216	q1	q2	OK	1.91322	0.644435	-1.5699	-0.752986	0.39875	0.999686	no
XLOC_014790	XLOC_014790	LOC100862241	3:14863537-14872529	q1	q2	OK	1.70233	0.588361	-1.53274	-0.842762	0.35415	0.999686	no
XLOC_012553	XLOC_012553	Gm10912	2:104065796-104067486	q1	q2	OK	0.705916	0.244272	-1.53101	-1.17494	0.1071	0.999686	no
XLOC_014870	XLOC_014870	Gm9442	3:51402672-51403584	q1	q2	OK	1.37064	0.474682	-1.52982	-1.02078	0.18785	0.999686	no
XLOC_007948	XLOC_007948	Amhr2	15:102445366-102454639	q1	q2	OK	0.91899	0.324906	-1.50003	-1.18336	0.12105	0.999686	no
XLOC_019631	XLOC_019631	Timp4	6:115134901-115282626	q1	q2	OK	53.1933	18.858	-1.49607	-0.52548	0.57625	0.999686	no
XLOC_013669	XLOC_013669	Gm20279	2:105536079-105697364	q1	q2	OK	0.995657	0.354057	-1.49167	-0.594626	0.6201	0.999686	no
XLOC_022461	XLOC_022461	AW046200	8:57523824-57663430	q1	q2	OK	0.734825	0.26244	-1.48542	-0.408001	0.6214	0.999686	no
XLOC_023340	XLOC_023340	Gm20254	8:106603367-106851439	q1	q2	OK	1.89591	0.683317	-1.47227	-0.529573	0.6477	0.999686	no
XLOC_008920	XLOC_008920	Socs1	16:10783807-10785536	q1	q2	OK	1.5974	0.576466	-1.47042	-1.21749	0.1064	0.999686	no
XLOC_002509	XLOC_002509	Acss3	10:106936163-107123664	q1	q2	OK	0.713541	0.259125	-1.46135	-1.07521	0.138	0.999686	no
XLOC_019895	XLOC_019895	Eps8l1	7:4464741-4479242	q1	q2	OK	0.954609	0.353874	-1.43167	-0.752619	0.41205	0.999686	no
XLOC_017353	XLOC_017353	Cxcl13	5:95956938-95961068	q1	q2	OK	1.69438	0.628195	-1.43147	-1.01814	0.1955	0.999686	no
XLOC_016924	XLOC_016924	Tnfrsf14	4:154922209-154928077	q1	q2	OK	0.806	0.29893	-1.43097	-0.910719	0.2357	0.999686	no
XLOC_001998	XLOC_001998	Arhgap9	10:127323726-127341579	q1	q2	OK	1.16094	0.433282	-1.42192	-0.568584	0.53635	0.999686	no
XLOC_022600	XLOC_022600	Palm3	8:84021473-84042575	q1	q2	OK	1.344	0.504943	-1.41234	-1.17194	0.11745	0.999686	no
XLOC_010720	XLOC_010720	A930012L18Rik	18:44425059-44812182	q1	q2	OK	1.5447	0.583257	-1.40512	-0.677187	0.3621	0.999686	no
XLOC_023217	XLOC_023217	Nanos3	8:84173732-84176552	q1	q2	OK	1.35337	0.511174	-1.40467	-0.988184	0.19075	0.999686	no
XLOC_010035	XLOC_010035	Gm16386	17:22779857-22817747	q1	q2	OK	2.58598	0.979446	-1.40068	-1.09957	0.13695	0.999686	no
XLOC_022932	XLOC_022932	Gm15350	8:12757015-12873052	q1	q2	OK	0.748859	0.28441	-1.39672	-0.0951679	0.55815	0.999686	no
XLOC_016908	XLOC_016908	Espn	4:152120875-152152207	q1	q2	OK	1.78926	0.682645	-1.39016	-1.08298	0.1294	0.999686	no
XLOC_009494	XLOC_009494	D630044L22Rik	17:25946382-25965505	q1	q2	OK	0.778451	0.297335	-1.38852	-0.430169	0.63795	0.999686	no
XLOC_008528	XLOC_008528	Gm10343	16:10801334-10801790	q1	q2	OK	1.43415	0.549568	-1.38383	-0.877317	0.3323	0.999686	no
XLOC_009328	XLOC_009328	T2	17:8372395-8422728	q1	q2	OK	0.722614	0.277022	-1.38323	-0.543901	0.47065	0.999686	no
XLOC_022754	XLOC_022754	Cdh1	8:106603367-106851439	q1	q2	OK	1.3483	0.517441	-1.38168	-0.953105	0.2701	0.999686	no
XLOC_014700	XLOC_014700	Adh1	3:138277644-138290691	q1	q2	OK	1.56277	0.600867	-1.37899	-1.16497	0.122	0.999686	no
XLOC_010215	XLOC_010215	Gm15821	17:34204478-34216321	q1	q2	OK	2.96342	1.14563	-1.37112	-0.548519	0.6176	0.999686	no
XLOC_013274	XLOC_013274	Mir3960	2:32712899-32712972	q1	q2	OK	302.453	117.076	-1.36927	-21.9714	0.4632	0.999686	no
XLOC_023992	XLOC_023992	Ripply2	9:87015536-87019916	q1	q2	OK	5.18444	2.00836	-1.36817	-1.13159	0.13335	0.999686	no
XLOC_007744	XLOC_007744	Ncf4	15:78244810-78262580	q1	q2	OK	1.16679	0.452761	-1.36573	-1.1392	0.1272	0.999686	no
XLOC_021370	XLOC_021370	Hpn	7:31098724-31115290	q1	q2	OK	1.11891	0.438334	-1.352	-1.10324	0.10695	0.999686	no
XLOC_001648	XLOC_001648	2210417K05Rik	10:62268854-62379908	q1	q2	OK	1.25988	0.49733	-1.34101	-0.0575129	0.4857	0.999686	no
XLOC_010205	XLOC_010205	H2-K2	17:33974658-33978791	q1	q2	OK	2.62641	1.03695	-1.34075	-1.16057	0.11985	0.999686	no
XLOC_000381	XLOC_000381	3110009E18Rik	1:120121186-120188189	q1	q2	OK	3.39924	1.34634	-1.33617	-0.931782	0.2093	0.999686	no
XLOC_018113	XLOC_018113	Plac8	5:100553732-100572205	q1	q2	OK	1.43895	0.573742	-1.32654	-0.863078	0.2273	0.999686	no
XLOC_021509	XLOC_021509	Sec1	7:45677685-45679558	q1	q2	OK	0.737	0.295459	-1.3187	-1.02536	0.16895	0.999686	no
XLOC_018259	XLOC_018259	Oas1c	5:120800198-120812514	q1	q2	OK	0.789678	0.316855	-1.31744	-1.11658	0.1355	0.999686	no
XLOC_008022	XLOC_008022	4930592A05Rik	15:33083128-33653436	q1	q2	OK	1.05309	0.422874	-1.31633	-0.359812	0.6526	0.999686	no
XLOC_014887	XLOC_014887	Gm410	3:57667421-57692537	q1	q2	OK	1.2766	0.51394	-1.31263	-1.14756	0.12455	0.999686	no
XLOC_018261	XLOC_018261	Oas1a	5:120896255-120907525	q1	q2	OK	0.680932	0.27464	-1.30997	-0.926789	0.1934	0.999686	no
XLOC_023311	XLOC_023311	Exoc3l	8:105289923-105296098	q1	q2	OK	1.91448	0.774788	-1.30508	-1.04178	0.1464	0.999686	no
XLOC_014924	XLOC_014924	Shox2	3:66973265-66981771	q1	q2	OK	1.09973	0.449786	-1.28984	-0.9589	0.2096	0.999686	no
XLOC_019866	XLOC_019866	Gm5887	6:147075061-147087032	q1	q2	OK	0.755908	0.311504	-1.27896	-0.841967	0.27105	0.999686	no
XLOC_008200	XLOC_008200	Recql4	15:76701541-76710559	q1	q2	OK	1.16816	0.481557	-1.27847	-0.86668	0.2359	0.999686	no
XLOC_024570	XLOC_024570	2410076I21Rik	9:58582239-58741559	q1	q2	OK	1.05505	0.435469	-1.27668	-0.0653578	0.53395	0.999686	no
XLOC_008984	XLOC_008984	LOC100505355	16:18876749-18970309	q1	q2	OK	0.830285	0.343018	-1.27532	-0.111396	0.6036	0.999686	no
XLOC_026028	XLOC_026028	3632454L22Rik	X:135022409-135060336	q1	q2	OK	1.60452	0.666892	-1.26661	-1.11853	0.1217	0.999686	no
XLOC_011065	XLOC_011065	LOC100861847	18:61953074-62034123	q1	q2	OK	4.49034	1.86942	-1.26424	-0.345811	0.64785	0.999686	no
XLOC_021812	XLOC_021812	Beta-s	7:103826522-103853207	q1	q2	OK	38.385	16.052	-1.25779	-1.14925	0.1197	0.999686	no
XLOC_010531	XLOC_010531	1110020A21Rik	17:84917181-85023992	q1	q2	OK	1.87801	0.78628	-1.25609	-0.15962	0.3963	0.999686	no
XLOC_018328	XLOC_018328	A330070K13Rik	5:130369457-130840645	q1	q2	OK	1.02964	0.432402	-1.2517	-0.160523	0.70265	0.999686	no
XLOC_001811	XLOC_001811	2210404O07Rik	10:81393063-81395079	q1	q2	OK	0.997943	0.419649	-1.24977	-0.75122	0.3342	0.999686	no
XLOC_015046	XLOC_015046	S100a9	3:90692632-90695691	q1	q2	OK	5.92193	2.49058	-1.24958	-0.99911	0.187	0.999686	no
XLOC_013662	XLOC_013662	Depdc7	2:104721783-104742801	q1	q2	OK	1.36774	0.576377	-1.24671	-1.13936	0.11625	0.999686	no
XLOC_008846	XLOC_008846	4930404I05Rik	16:90936096-91044379	q1	q2	OK	1.51762	0.640058	-1.24554	-0.0799189	0.4884	0.999686	no
XLOC_020133	XLOC_020133	Cyp2f2	7:27119954-27133660	q1	q2	OK	1.0259	0.433233	-1.24368	-0.922917	0.22055	0.999686	no
XLOC_012056	XLOC_012056	Gm13293	2:11338365-11398500	q1	q2	OK	2.73697	1.15629	-1.24308	-1.14601	0.13815	0.999686	no
XLOC_001343	XLOC_001343	Mndal	1:173857219-173880187	q1	q2	OK	0.823412	0.347911	-1.2429	-0.994274	0.1746	0.999686	no
XLOC_019033	XLOC_019033	Usp18	6:121245905-121270917	q1	q2	OK	1.937	0.820162	-1.23984	-1.09236	0.1353	0.999686	no
XLOC_010863	XLOC_010863	Mbp	18:82475122-82585637	q1	q2	OK	2754.09	1166.71	-1.23913	-0.789772	0.24395	0.999686	no
XLOC_022118	XLOC_022118	Nkx6-2	7:139389108-139582797	q1	q2	OK	19.0313	8.06753	-1.23818	-0.644136	0.2622	0.999686	no
XLOC_008146	XLOC_008146	Lypd2	15:74732251-74734313	q1	q2	OK	0.919477	0.390094	-1.23699	-0.642689	0.38955	0.999686	no
XLOC_020443	XLOC_020443	1500012K07Rik	7:75114893-75331419	q1	q2	OK	1.14888	0.491964	-1.22361	-0.0492055	0.5448	0.999686	no
XLOC_006068	XLOC_006068	C230035I16Rik	13:23427975-23431017	q1	q2	OK	1.12348	0.481698	-1.22177	-0.801293	0.2905	0.999686	no
XLOC_011805	XLOC_011805	Rps15a-ps2	19:28742158-28746097	q1	q2	OK	1.08823	0.470404	-1.21001	-0.799619	0.29955	0.999686	no
XLOC_017152	XLOC_017152	Gm19841	5:35697179-35729276	q1	q2	OK	1.52473	0.662518	-1.20252	-0.434361	0.58605	0.999686	no
XLOC_002980	XLOC_002980	Trim16	11:62820252-62842948	q1	q2	OK	1.06918	0.465995	-1.19811	-1.14355	0.1195	0.999686	no
XLOC_013621	XLOC_013621	Mdk	2:91922188-91932282	q1	q2	OK	27.4716	11.9942	-1.19561	-0.692353	0.3032	0.999686	no
XLOC_001227	XLOC_001227	4930562F07Rik	1:160044379-160078587	q1	q2	OK	1.2241	0.534656	-1.19503	-0.442578	0.6256	0.999686	no
XLOC_021566	XLOC_021566	Ipw	7:59619157-59728612	q1	q2	OK	15.3761	6.77563	-1.18226	-0.725787	0.30555	0.999686	no
XLOC_011524	XLOC_011524	Gsto2	19:47865544-47886305	q1	q2	OK	1.47786	0.653048	-1.17825	-1.01891	0.1295	0.999686	no
XLOC_003035	XLOC_003035	G630025P09Rik	11:69803594-69806038	q1	q2	OK	0.876945	0.387675	-1.17764	-0.987309	0.1673	0.999686	no
XLOC_003729	XLOC_003729	Fgf18	11:33117429-33147400	q1	q2	OK	2.54536	1.12754	-1.17469	-1.07472	0.1224	0.999686	no
XLOC_010096	XLOC_010096	Chtf18	17:25717171-25727415	q1	q2	OK	0.75601	0.336538	-1.16764	-0.339059	0.5926	0.999686	no
XLOC_015744	XLOC_015744	Calr4	4:109235631-109254251	q1	q2	OK	0.857853	0.382527	-1.16517	-0.906338	0.2125	0.999686	no
XLOC_018198	XLOC_018198	Crybb3	5:113075838-113081584	q1	q2	OK	0.819422	0.365554	-1.16452	-0.733759	0.2866	0.999686	no
XLOC_022513	XLOC_022513	Lrrc25	8:70616843-70620850	q1	q2	OK	0.717137	0.320567	-1.16162	-0.7766	0.2977	0.999686	no
XLOC_009276	XLOC_009276	Cldn14	16:93919030-94008837	q1	q2	OK	1.88615	0.84434	-1.15954	-1.06018	0.1189	0.999686	no
XLOC_022238	XLOC_022238	Tnfsf13b	8:10006632-10036000	q1	q2	OK	1.31776	0.590341	-1.15847	-1.03895	0.14575	0.999686	no
XLOC_005408	XLOC_005408	Serpina1a	12:103853294-103863619	q1	q2	OK	0.853179	0.383536	-1.15349	-0.888528	0.19855	0.999686	no
XLOC_023238	XLOC_023238	Gm5741	8:85067567-85067982	q1	q2	OK	3.52016	1.58448	-1.15163	-0.859619	0.3321	0.999686	no
XLOC_004099	XLOC_004099	Evi2a,Evi2b	11:79339891-79581609	q1	q2	OK	31.8868	14.3533	-1.15158	-0.600873	0.48115	0.999686	no
XLOC_013239	XLOC_013239	2600006K01Rik	2:29868725-29882840	q1	q2	OK	2.02463	0.911672	-1.15107	-0.477093	0.64145	0.999686	no
XLOC_007814	XLOC_007814	LOC100504676	15:83174010-83174806	q1	q2	OK	1.01656	0.460396	-1.14275	-0.772922	0.30305	0.999686	no
XLOC_007753	XLOC_007753	Lgals1	15:78877189-78930465	q1	q2	OK	23.1945	10.5213	-1.14047	-0.385558	0.6332	0.999686	no
XLOC_018752	XLOC_018752	Creb5	6:53573373-53695832	q1	q2	OK	1.7521	0.796574	-1.13721	-1.15885	0.11365	0.999686	no
XLOC_020734	XLOC_020734	Acsm5	7:119526264-119543360	q1	q2	OK	0.736725	0.334943	-1.13721	-0.777823	0.30695	0.999686	no
XLOC_023402	XLOC_023402	Gm6834	8:119575234-119605240	q1	q2	OK	1.00514	0.457973	-1.13406	-0.225424	0.66845	0.999686	no
XLOC_008666	XLOC_008666	2310010M20Rik	16:32271608-32274779	q1	q2	OK	0.975503	0.444605	-1.13362	-0.917126	0.21285	0.999686	no
XLOC_012888	XLOC_012888	Myh7b	2:155611211-155692384	q1	q2	OK	2.10645	0.961088	-1.13207	-0.417855	0.58725	0.999686	no
XLOC_020797	XLOC_020797	LOC100861830	7:127015050-127021211	q1	q2	OK	37.0417	16.9328	-1.12933	-0.524214	0.6192	0.999686	no
XLOC_020927	XLOC_020927	Tspan4	7:141475235-141539857	q1	q2	OK	23.1322	10.5755	-1.12918	-0.734863	0.3512	0.999686	no
XLOC_021837	XLOC_021837	Trim30d	7:104470013-104507849	q1	q2	OK	1.14467	0.524365	-1.12629	-1.13821	0.10725	0.999686	no
XLOC_023057	XLOC_023057	Gm2366	8:44950207-45052257	q1	q2	OK	0.716124	0.32819	-1.12568	-0.219392	0.6166	0.999686	no
XLOC_014764	XLOC_014764	2700069I18Rik	3:5177822-5415855	q1	q2	OK	0.699301	0.320923	-1.12369	-0.206619	0.67465	0.999686	no
XLOC_009687	XLOC_009687	Rnf39	17:36943050-36947986	q1	q2	OK	2.27277	1.04304	-1.12365	-1.11279	0.12405	0.999686	no
XLOC_019731	XLOC_019731	4921513H07Rik	6:127776083-127778665	q1	q2	OK	0.868662	0.40025	-1.11789	-0.673711	0.38785	0.999686	no
XLOC_013430	XLOC_013430	Cerkl	2:79255425-79428988	q1	q2	OK	1.68031	0.775631	-1.11529	-0.476891	0.6142	0.999686	no
XLOC_025862	XLOC_025862	Dnase1l1	X:74273216-74282333	q1	q2	OK	1.44185	0.665635	-1.11512	-1.03585	0.1139	0.999686	no
XLOC_002373	XLOC_002373	Adamtsl5	10:80340715-80348446	q1	q2	OK	4.63674	2.14281	-1.1136	-1.07924	0.1272	0.999686	no
XLOC_001992	XLOC_001992	A730063M14Rik	10:127070480-127071101	q1	q2	OK	7.91856	3.66167	-1.11274	-0.850189	0.25915	0.999686	no
XLOC_020362	XLOC_020362	Mamstr	7:45639976-45645768	q1	q2	OK	1.2323	0.570299	-1.11156	-1.07465	0.1267	0.999686	no
XLOC_008569	XLOC_008569	Serpind1	16:17280350-17430826	q1	q2	OK	4.04695	1.878	-1.10764	-0.222807	0.6336	0.999686	no
XLOC_009604	XLOC_009604	H2-DMb1	17:34153190-34160229	q1	q2	OK	2.29661	1.06924	-1.10292	-1.02907	0.1463	0.999686	no
XLOC_023915	XLOC_023915	Rora	9:68653801-69379031	q1	q2	OK	14.6582	6.82759	-1.10226	-1.31923	0.13095	0.999686	no
XLOC_022034	XLOC_022034	2900092E17Rik	7:127015050-127021211	q1	q2	OK	40.6512	18.9715	-1.09947	-0.567861	0.54705	0.999686	no
XLOC_004111	XLOC_004111	Gm11423	11:82779600-82781042	q1	q2	OK	1.32761	0.619955	-1.0986	-0.868091	0.22805	0.999686	no
XLOC_020203	XLOC_020203	AI428936	7:30314815-30319045	q1	q2	OK	3.12658	1.462	-1.09664	-1.10265	0.1256	0.999686	no
XLOC_013743	XLOC_013743	Exd1	2:119519403-119547627	q1	q2	OK	0.729837	0.341345	-1.09635	-0.935419	0.21015	0.999686	no
XLOC_024011	XLOC_024011	Plscr1	9:92250193-92272561	q1	q2	OK	2.0077	0.939074	-1.09623	-1.10304	0.1269	0.999686	no
XLOC_004481	XLOC_004481	B230344G16Rik	11:115974724-116012719	q1	q2	OK	0.961282	0.449724	-1.09592	-0.341655	0.69175	0.999686	no
XLOC_001751	XLOC_001751	Fgf22	10:79755118-79756961	q1	q2	OK	2.52577	1.18248	-1.09491	-0.797923	0.2862	0.999686	no
XLOC_009126	XLOC_009126	Tmprss7	16:45656316-45693658	q1	q2	OK	1.4016	0.656703	-1.09376	-1.0989	0.1346	0.999686	no
XLOC_021489	XLOC_021489	Flt3l	7:45131188-45136432	q1	q2	OK	2.72051	1.27529	-1.09305	-0.996105	0.1571	0.999686	no
XLOC_014684	XLOC_014684	Bdh2	3:135281220-135304426	q1	q2	OK	2.78919	1.312	-1.08807	-1.02589	0.1462	0.999686	no
XLOC_011755	XLOC_011755	A330040F15Rik	19:12573524-12596566	q1	q2	OK	2.95586	1.39059	-1.08788	-0.796224	0.25715	0.999686	no
XLOC_019187	XLOC_019187	4930479D17Rik	6:146657217-146665403	q1	q2	OK	0.79014	0.371737	-1.08783	-0.701282	0.32945	0.999686	no
XLOC_017776	XLOC_017776	Gm19440	5:8072351-8368081	q1	q2	OK	3.88465	1.84497	-1.07418	-0.256019	0.66355	0.999686	no
XLOC_010787	XLOC_010787	LOC545261	18:61639652-61665538	q1	q2	OK	2.3711	1.12637	-1.07388	-0.644669	0.325	0.999686	no
XLOC_002575	XLOC_002575	Gm9079	10:122078111-122079879	q1	q2	OK	1.85588	0.883756	-1.07038	-1.05948	0.1371	0.999686	no
XLOC_004117	XLOC_004117	Slfn8	11:83002157-83020810	q1	q2	OK	0.748267	0.357019	-1.06755	-0.968173	0.1701	0.999686	no
XLOC_007475	XLOC_007475	Lect1	14:79637689-79662170	q1	q2	OK	1.30269	0.621569	-1.06751	-0.952291	0.17415	0.999686	no
XLOC_016017	XLOC_016017	Agmat	4:141746674-141759263	q1	q2	OK	0.814265	0.388555	-1.06738	-0.85723	0.23455	0.999686	no
XLOC_018805	XLOC_018805	E230016M11Rik	6:67035095-67080652	q1	q2	OK	2.47137	1.18092	-1.06539	-0.82153	0.24245	0.999686	no
XLOC_000357	XLOC_000357	Gm17634	1:105276916-105361629	q1	q2	OK	1.88503	0.902814	-1.06208	-0.304891	0.68245	0.999686	no
XLOC_023148	XLOC_023148	Ifi30	8:70762772-70766663	q1	q2	OK	5.20136	2.4915	-1.06187	-1.05881	0.15395	0.999686	no
XLOC_001631	XLOC_001631	Gm19916	10:60762594-60831581	q1	q2	OK	8.8982	4.26468	-1.06107	-0.405833	0.6971	0.999686	no
XLOC_025495	XLOC_025495	Alas2	X:150547416-150570622	q1	q2	OK	3.09537	1.48716	-1.05755	-1.11424	0.1231	0.999686	no
XLOC_021775	XLOC_021775	Trim21	7:102557921-102565469	q1	q2	OK	1.69053	0.812408	-1.0572	-1.07011	0.129	0.999686	no
XLOC_006027	XLOC_006027	Zfp389	13:21504315-21506524	q1	q2	OK	1.08967	0.523681	-1.05712	-0.793103	0.2964	0.999686	no
XLOC_012891	XLOC_012891	Mmp24	2:155775343-155819203	q1	q2	OK	24.8994	12.0465	-1.04749	-1.19167	0.12625	0.999686	no
XLOC_003980	XLOC_003980	Slc2a4	11:69942285-69948190	q1	q2	OK	1.11081	0.537462	-1.04738	-0.995192	0.1771	0.999686	no
XLOC_022729	XLOC_022729	Plekhg4	8:105375380-105413487	q1	q2	OK	1.18537	0.573899	-1.04647	-1.14057	0.10605	0.999686	no
XLOC_015916	XLOC_015916	LOC100862259	4:132330685-132353686	q1	q2	OK	1.53683	0.745436	-1.0438	-0.298895	0.69455	0.999686	no
XLOC_022335	XLOC_022335	Gm17491	8:22462613-22569616	q1	q2	OK	2.53124	1.2318	-1.03907	-0.364449	0.72885	0.999686	no
XLOC_022976	XLOC_022976	Nek3	8:22128282-22166435	q1	q2	OK	1.86709	0.908982	-1.03847	-0.999663	0.156	0.999686	no
XLOC_019527	XLOC_019527	2310040G24Rik	6:86483375-86488227	q1	q2	OK	2.24838	1.09577	-1.03694	-0.738696	0.28785	0.999686	no
XLOC_007212	XLOC_007212	Gch1	14:47153894-47189402	q1	q2	OK	0.974328	0.475278	-1.03564	-0.972091	0.1802	0.999686	no
XLOC_014258	XLOC_014258	5031434O11Rik	3:51515317-51567117	q1	q2	OK	3.66641	1.79775	-1.02818	-0.12875	0.59155	0.999686	no
XLOC_024002	XLOC_024002	Bcl2a1b	9:89199272-89207838	q1	q2	OK	2.53717	1.24509	-1.02697	-0.809557	0.27615	0.999686	no
XLOC_007588	XLOC_007588	2014-03-11	15:26309071-26409573	q1	q2	OK	4.53925	2.2316	-1.02437	-1.15617	0.10985	0.999686	no
XLOC_002898	XLOC_002898	LOC100862216	11:55394498-55420080	q1	q2	OK	3.42485	1.68816	-1.02059	-0.0616875	0.5146	0.999686	no
XLOC_016360	XLOC_016360	Ptgr1	4:58965589-58987078	q1	q2	OK	1.01951	0.503496	-1.01783	-0.918714	0.19245	0.999686	no
XLOC_025545	XLOC_025545	Ace2	X:164139341-164188418	q1	q2	OK	0.683821	0.338148	-1.01597	-0.957699	0.145	0.999686	no
XLOC_014434	XLOC_014434	S100a8	3:90669070-90670034	q1	q2	OK	5.66094	2.81448	-1.00817	-0.78058	0.26975	0.999686	no
XLOC_006755	XLOC_006755	Rnase6	14:51129067-51131122	q1	q2	OK	0.87845	0.436956	-1.00747	-0.710843	0.336	0.999686	no
XLOC_013678	XLOC_013678	Bbox1	2:110265082-110305725	q1	q2	OK	3.58171	1.78381	-1.00569	-1.02659	0.1569	0.999686	no
XLOC_011732	XLOC_011732	Ms4a7	19:11321405-11336116	q1	q2	OK	0.874078	0.435869	-1.00387	-0.699997	0.28805	0.999686	no
XLOC_005135	XLOC_005135	LOC100861601	12:23776485-23800646	q1	q2	OK	0.855167	0.428499	-0.996914	-0.753699	0.3313	0.999686	no
XLOC_013338	XLOC_013338	Nmi	2:51948498-51973208	q1	q2	OK	4.11405	2.06444	-0.994811	-1.07015	0.1354	0.999686	no
XLOC_018176	XLOC_018176	Gm15787	5:110135839-110176504	q1	q2	OK	1.14927	0.577063	-0.993921	-0.270926	0.6609	0.999686	no
XLOC_023201	XLOC_023201	Il15	8:82331623-82402586	q1	q2	OK	1.2416	0.624724	-0.990908	-0.812212	0.2557	0.999686	no
XLOC_007707	XLOC_007707	Gsdmd	15:75862334-75867404	q1	q2	OK	2.26329	1.13984	-0.989588	-0.982565	0.17405	0.999686	no
XLOC_011031	XLOC_011031	Ppic	18:53406340-53418007	q1	q2	OK	2.30542	1.16233	-0.988014	-0.860068	0.246	0.999686	no
XLOC_003188	XLOC_003188	Rnf135	11:80183871-80199753	q1	q2	OK	2.94217	1.48654	-0.984924	-1.09949	0.1261	0.999686	no
XLOC_025946	XLOC_025946	Cited1	X:102247435-102251769	q1	q2	OK	3.68968	1.86656	-0.98311	-0.902049	0.2075	0.999686	no
XLOC_025384	XLOC_025384	3110007F17Rik	X:123103558-123143293	q1	q2	OK	0.869819	0.440998	-0.979944	-0.696008	0.3543	0.999686	no
XLOC_022195	XLOC_022195	Tnfrsf22	7:143636724-143649638	q1	q2	OK	0.693874	0.352299	-0.977873	-0.836692	0.257	0.999686	no
XLOC_009552	XLOC_009552	Glp1r	17:30901866-31010710	q1	q2	OK	1.19575	0.607815	-0.976216	-0.63479	0.3697	0.999686	no
XLOC_010793	XLOC_010793	Spink10	18:62548910-62741387	q1	q2	OK	1.33518	0.678926	-0.975703	-0.679856	0.3185	0.999686	no
XLOC_014232	XLOC_014232	LOC100862007	3:36448922-36475887	q1	q2	OK	48.2572	24.5459	-0.975263	-0.666797	0.3341	0.999686	no
XLOC_001773	XLOC_001773	1600002K03Rik	10:80172943-80175119	q1	q2	OK	6.29721	3.20507	-0.974359	-0.97185	0.1787	0.999686	no
XLOC_002137	XLOC_002137	Enpp1	10:24641410-24712102	q1	q2	OK	2.28504	1.16342	-0.973848	-1.09706	0.1327	0.999686	no
XLOC_025769	XLOC_025769	Xlr	X:53783747-53797696	q1	q2	OK	1.17444	0.598457	-0.972651	-0.77671	0.27075	0.999686	no
XLOC_009583	XLOC_009583	Pram1	17:33638055-33645706	q1	q2	OK	1.41028	0.718688	-0.972539	-0.941281	0.1836	0.999686	no
XLOC_003079	XLOC_003079	Xaf1	11:72301628-72313733	q1	q2	OK	2.27459	1.1611	-0.970113	-1.09294	0.12435	0.999686	no
XLOC_020838	XLOC_020838	Mir5102	7:130834436-130834523	q1	q2	OK	491.469	251.989	-0.963738	-0.731093	0.31625	0.999686	no
XLOC_007226	XLOC_007226	Gm3601	14:49971362-49989708	q1	q2	OK	22.3923	11.4812	-0.963726	-0.730049	0.32185	0.999686	no
XLOC_016332	XLOC_016332	2700081L22Rik	4:52430283-52438964	q1	q2	OK	1.22372	0.628657	-0.960923	-0.660238	0.37645	0.999686	no
XLOC_017746	XLOC_017746	2310047D07Rik	5:149237153-149237987	q1	q2	OK	0.750912	0.38638	-0.958624	-0.61913	0.4155	0.999686	no
XLOC_012728	XLOC_012728	1700020A23Rik	2:130405258-130406074	q1	q2	OK	1.16092	0.597545	-0.958148	-0.65364	0.37065	0.999686	no
XLOC_002425	XLOC_002425	1190007I07Rik	10:82619850-82623228	q1	q2	OK	7.94587	4.09045	-0.957944	-0.887875	0.21545	0.999686	no
XLOC_003332	XLOC_003332	Scrn2	11:97029951-97033960	q1	q2	OK	4.5564	2.34628	-0.957521	-1.07567	0.13345	0.999686	no
XLOC_022462	XLOC_022462	Gm2921	8:57774051-58911627	q1	q2	OK	1.01879	0.524795	-0.957026	-0.190591	0.71405	0.999686	no
XLOC_011042	XLOC_011042	LOC100861812	18:57878677-57958106	q1	q2	OK	47.1442	24.3715	-0.951888	-0.426483	0.56215	0.999686	no
XLOC_014105	XLOC_014105	Gm14443	2:175168818-175176979	q1	q2	OK	1.04481	0.540275	-0.951476	-0.843745	0.22885	0.999686	no
XLOC_003200	XLOC_003200	Ccl12	11:82101844-82103399	q1	q2	OK	2.86964	1.48502	-0.950386	-0.73747	0.31035	0.999686	no
XLOC_004929	XLOC_004929	6230426M11Rik	12:104752094-104865076	q1	q2	OK	1.88402	0.976539	-0.948067	-0.119711	0.6244	0.999686	no
XLOC_014512	XLOC_014512	Hist2h3c1	3:96246684-96248509	q1	q2	OK	1.68886	0.87547	-0.947923	-0.944495	0.1869	0.999686	no
XLOC_011861	XLOC_011861	Pdlim1	19:40222238-40271616	q1	q2	OK	5.23258	2.71652	-0.945763	-1.10533	0.12195	0.999686	no
XLOC_009961	XLOC_009961	6530411M01Rik	17:9147718-9168022	q1	q2	OK	0.858726	0.445838	-0.945678	-0.70791	0.34105	0.999686	no
XLOC_009067	XLOC_009067	1700007L15Rik	16:33379853-33380736	q1	q2	OK	1.20075	0.623536	-0.945389	-0.68413	0.35715	0.999686	no
XLOC_001427	XLOC_001427	Gm3934	1:192052687-192092564	q1	q2	OK	2.08384	1.08704	-0.938838	-0.534086	0.4553	0.999686	no
XLOC_014551	XLOC_014551	A230001M10Rik	3:102262404-102288771	q1	q2	OK	2.44637	1.27798	-0.936774	-0.946783	0.1964	0.999686	no
XLOC_012733	XLOC_012733	Oxt	2:130576172-130576988	q1	q2	OK	35.4336	18.5116	-0.936693	-1.13793	0.1731	0.999686	no
XLOC_021477	XLOC_021477	Bcl2l12	7:44986899-44997579	q1	q2	OK	1.84057	0.962212	-0.935726	-0.754006	0.3007	0.999686	no
XLOC_023846	XLOC_023846	Cyp11a1	9:58015016-58027023	q1	q2	OK	1.26942	0.663998	-0.934924	-0.845143	0.2336	0.999686	no
XLOC_014965	XLOC_014965	Mnd1	3:84087933-84155786	q1	q2	OK	0.834216	0.436459	-0.934576	-0.661554	0.3774	0.999686	no
XLOC_022207	XLOC_022207	Tpcn2	7:145253922-145283927	q1	q2	OK	1.84441	0.965006	-0.934545	-1.04402	0.1386	0.999686	no
XLOC_013139	XLOC_013139	A930004D18Rik	2:18025186-18037741	q1	q2	OK	1.26963	0.665187	-0.932573	-0.704322	0.2625	0.999686	no
XLOC_012974	XLOC_012974	Mmp9	2:164948250-164955846	q1	q2	OK	0.953918	0.499979	-0.931996	-0.923565	0.1902	0.999686	no
XLOC_018979	XLOC_018979	Il17rc	6:113471454-113483163	q1	q2	OK	2.33974	1.22689	-0.931339	-1.00986	0.157	0.999686	no
XLOC_020174	XLOC_020174	Rinl	7:28788968-28798965	q1	q2	OK	1.02367	0.537156	-0.93034	-0.921494	0.2019	0.999686	no
XLOC_009829	XLOC_009829	Crb3	17:57062276-57065918	q1	q2	OK	1.19428	0.626703	-0.930286	-0.770018	0.2908	0.999686	no
XLOC_014103	XLOC_014103	Gm14393	2:175061548-175067763	q1	q2	OK	1.2	0.630141	-0.929295	-0.603243	0.39685	0.999686	no
XLOC_004533	XLOC_004533	2810410L24Rik	11:120185342-120189856	q1	q2	OK	2.68646	1.4116	-0.928372	-0.92787	0.20015	0.999686	no
XLOC_006372	XLOC_006372	Gm4211	13:80957664-80963730	q1	q2	OK	0.893667	0.469731	-0.927902	-0.814491	0.26755	0.999686	no
XLOC_020164	XLOC_020164	Gmfg	7:28437446-28446895	q1	q2	OK	2.13528	1.12266	-0.927504	-0.83525	0.21145	0.999686	no
XLOC_017164	XLOC_017164	Cytl1	5:37735518-37739820	q1	q2	OK	1.4427	0.759965	-0.924772	-0.748963	0.2999	0.999686	no
XLOC_000608	XLOC_000608	Aim2	1:173420603-173466040	q1	q2	OK	1.51053	0.795947	-0.924315	-0.87301	0.23625	0.999686	no
XLOC_002292	XLOC_002292	A330049N07Rik	10:72973302-73086705	q1	q2	OK	1.11867	0.589923	-0.923189	-0.856116	0.23695	0.999686	no
XLOC_009648	XLOC_009648	H2-Q1	17:35320557-35325099	q1	q2	OK	1.05793	0.558341	-0.922024	-0.850254	0.23435	0.999686	no
XLOC_016405	XLOC_016405	Astn2	4:65380802-66404483	q1	q2	OK	18.3927	9.71482	-0.920873	-0.663055	0.4411	0.999686	no
XLOC_010814	XLOC_010814	Cidea	18:67321208-67367794	q1	q2	OK	5.25799	2.77994	-0.919455	-0.946966	0.1715	0.999686	no
XLOC_008204	XLOC_008204	Zfp647	15:76910369-76925448	q1	q2	OK	1.91552	1.01339	-0.918544	-0.927054	0.17405	0.999686	no
XLOC_010268	XLOC_010268	H2-T23	17:35994503-36038174	q1	q2	OK	22.5697	11.9636	-0.915735	-1.16994	0.11915	0.999686	no
XLOC_024800	XLOC_024800	Mapkapk3	9:107254926-107289877	q1	q2	OK	2.26161	1.20068	-0.913502	-1.05794	0.13035	0.999686	no
XLOC_020033	XLOC_020033	Zfp296	7:19577286-19580656	q1	q2	OK	0.958014	0.509791	-0.910141	-0.707576	0.34335	0.999686	no
XLOC_019404	XLOC_019404	Inmt	6:55170626-55174990	q1	q2	OK	1.22845	0.653893	-0.90971	-0.729675	0.30355	0.999686	no
XLOC_015024	XLOC_015024	Efna1	3:89271729-89280951	q1	q2	OK	3.95273	2.10422	-0.909562	-0.994789	0.14875	0.999686	no
XLOC_003590	XLOC_003590	Npb	11:120608476-120609100	q1	q2	OK	1.71094	0.911392	-0.908647	-0.64504	0.37115	0.999686	no
XLOC_019217	XLOC_019217	Pon3	6:5220851-5256233	q1	q2	OK	1.87041	0.997256	-0.907318	-0.909982	0.2079	0.999686	no
XLOC_008182	XLOC_008182	Parp10	15:76232994-76243440	q1	q2	OK	1.59351	0.849908	-0.906832	-1.01919	0.14905	0.999686	no
XLOC_021765	XLOC_021765	Il18bp	7:102015076-102018155	q1	q2	OK	4.15364	2.21718	-0.90565	-1.00299	0.15055	0.999686	no
XLOC_022611	XLOC_022611	G430095P16Rik	8:84707598-84800340	q1	q2	OK	4.18642	2.23741	-0.903884	-0.212181	0.6919	0.999686	no
XLOC_024003	XLOC_024003	Mthfs	9:89211189-89240225	q1	q2	OK	2.8111	1.50733	-0.899145	-0.810878	0.25405	0.999686	no
XLOC_016716	XLOC_016716	BC013712	4:132782356-132796364	q1	q2	OK	0.717875	0.384932	-0.899129	-0.800896	0.23785	0.999686	no
XLOC_003948	XLOC_003948	Alox8	11:69183884-69197839	q1	q2	OK	2.35971	1.26633	-0.897955	-1.09343	0.11445	0.999686	no
XLOC_006950	XLOC_006950	6720463M24Rik	14:99046376-99074107	q1	q2	OK	1.80078	0.96659	-0.897647	-0.925403	0.1817	0.999686	no
XLOC_005434	XLOC_005434	Gm16596	12:108410654-108702306	q1	q2	OK	3.03949	1.63215	-0.897056	-0.184545	0.67235	0.999686	no
XLOC_015788	XLOC_015788	Tesk2	4:116720954-116807559	q1	q2	OK	3.29303	1.7683	-0.897051	-0.800826	0.26255	0.999686	no
XLOC_003710	XLOC_003710	Prorsd1	11:29511756-29515033	q1	q2	OK	2.41683	1.29821	-0.896591	-0.943313	0.17625	0.999686	no
XLOC_001634	XLOC_001634	Tbata	10:61171963-61188841	q1	q2	OK	6.48105	3.48343	-0.89572	-1.00136	0.1253	0.999686	no
XLOC_011386	XLOC_011386	Gm9895	19:29067300-29069503	q1	q2	OK	1.20424	0.648559	-0.892814	-0.567491	0.44875	0.999686	no
XLOC_024019	XLOC_024019	Pcolce2	9:95637627-95695551	q1	q2	OK	4.88244	2.63217	-0.891354	-1.12072	0.1057	0.999686	no
XLOC_000983	XLOC_000983	Sp110	1:85576898-85645037	q1	q2	OK	1.50236	0.810293	-0.890713	-0.576475	0.44	0.999686	no
XLOC_024448	XLOC_024448	Gm10687	9:44123767-44134485	q1	q2	OK	1.93296	1.04718	-0.884306	-0.880334	0.21885	0.999686	no
XLOC_003534	XLOC_003534	Gm11744	11:116657107-116668389	q1	q2	OK	6.17302	3.34474	-0.884083	-0.878109	0.2295	0.999686	no
XLOC_003201	XLOC_003201	Ccl8	11:82115184-82116799	q1	q2	OK	0.97309	0.52734	-0.88384	-0.517425	0.6252	0.999686	no
XLOC_013936	XLOC_013936	Dusp15	2:152940994-152951582	q1	q2	OK	17.1762	9.31249	-0.883175	-0.874761	0.1983	0.999686	no
XLOC_001176	XLOC_001176	Pla2g4a	1:149829621-149961284	q1	q2	OK	2.95051	1.59979	-0.883086	-1.07509	0.11845	0.999686	no
XLOC_016025	XLOC_016025	Lrrc38	4:143349749-143371028	q1	q2	OK	2.08879	1.13318	-0.882282	-0.882527	0.2243	0.999686	no
XLOC_001275	XLOC_001275	Gm16701	1:166974022-166999730	q1	q2	OK	2.57868	1.3991	-0.882135	-0.802934	0.2556	0.999686	no
XLOC_000303	XLOC_000303	Mlph	1:90915099-90951142	q1	q2	OK	1.00067	0.54308	-0.881737	-0.93191	0.1764	0.999686	no
XLOC_002271	XLOC_002271	Gm10118	10:63430097-65003667	q1	q2	OK	2.06651	1.12191	-0.881236	-0.427363	0.48375	0.999686	no
XLOC_018189	XLOC_018189	Cryba4	5:112246532-112252502	q1	q2	OK	1.45019	0.787368	-0.88113	-0.650285	0.351	0.999686	no
XLOC_022565	XLOC_022565	Hmox1	8:75093617-75100593	q1	q2	OK	3.88232	2.11189	-0.878382	-0.992782	0.1746	0.999686	no
XLOC_019867	XLOC_019867	Pthlh	6:147252109-147264085	q1	q2	OK	2.27893	1.24023	-0.877742	-0.884236	0.2198	0.999686	no
XLOC_019444	XLOC_019444	Gadd45a	6:67035095-67080652	q1	q2	OK	7.01922	3.82068	-0.877484	-0.950638	0.1815	0.999686	no
XLOC_002823	XLOC_002823	Trim7	11:48826137-48853493	q1	q2	OK	0.908797	0.495832	-0.874108	-0.483169	0.51145	0.999686	no
XLOC_000262	XLOC_000262	Sp100	1:85650049-85709448	q1	q2	OK	1.55941	0.852411	-0.87138	-0.869813	0.222	0.999686	no
XLOC_006854	XLOC_006854	Xkr6	14:63606529-63820411	q1	q2	OK	1.75019	0.957924	-0.86953	-0.871495	0.21625	0.999686	no
XLOC_014113	XLOC_014113	LOC628147	2:176140918-176144700	q1	q2	OK	0.906493	0.496204	-0.869362	-0.790231	0.2579	0.999686	no
XLOC_014801	XLOC_014801	Crh	3:19693400-19695396	q1	q2	OK	5.09704	2.79109	-0.868833	-0.971352	0.1707	0.999686	no
XLOC_015853	XLOC_015853	Rspo1	4:124986429-125009099	q1	q2	OK	3.89777	2.13624	-0.867573	-0.931391	0.19945	0.999686	no
XLOC_007283	XLOC_007283	Cdh24	14:54631991-54641364	q1	q2	OK	3.71951	2.04033	-0.866311	-1.10106	0.1285	0.999686	no
XLOC_004163	XLOC_004163	Lpo	11:87806427-87826114	q1	q2	OK	1.70624	0.936319	-0.865745	-0.871299	0.2276	0.999686	no
XLOC_010502	XLOC_010502	Gm6548	17:78850503-78852544	q1	q2	OK	3.57934	1.96608	-0.864369	-0.997795	0.15575	0.999686	no
XLOC_000756	XLOC_000756	6720483E21Rik	1:20888649-20890473	q1	q2	OK	0.701027	0.385187	-0.863913	-0.608391	0.3923	0.999686	no
XLOC_006048	XLOC_006048	Hist1h4i	13:22040815-22041352	q1	q2	OK	4.55432	2.50375	-0.863149	-0.728863	0.3187	0.999686	no
XLOC_023411	XLOC_023411	Gm19562	8:120736375-120756694	q1	q2	OK	4.47395	2.46157	-0.861968	-0.432943	0.59615	0.999686	no
XLOC_019017	XLOC_019017	Gm19981	6:118383380-118419807	q1	q2	OK	2.38149	1.31036	-0.861898	-0.232233	0.74035	0.999686	no
XLOC_000686	XLOC_000686	Gm17566	1:190121774-190217279	q1	q2	OK	3.52953	1.94213	-0.861838	-0.327851	0.71305	0.999686	no
XLOC_016126	XLOC_016126	Tmem52	4:155469113-155470858	q1	q2	OK	1.4174	0.779979	-0.861745	-0.603034	0.3674	0.999686	no
XLOC_024510	XLOC_024510	Layn	9:51056779-51077094	q1	q2	OK	2.85426	1.57107	-0.861372	-0.946944	0.16875	0.999686	no
XLOC_019484	XLOC_019484	Hk2	6:82725024-82774454	q1	q2	OK	2.34121	1.28881	-0.861222	-1.16367	0.1096	0.999686	no
XLOC_023321	XLOC_023321	Gm5914	8:105624335-105682922	q1	q2	OK	2.66781	1.46952	-0.860309	-0.218347	0.72495	0.999686	no
XLOC_006442	XLOC_006442	LOC100862307	13:100459779-100462157	q1	q2	OK	7.86728	4.33915	-0.858454	-0.991675	0.15795	0.999686	no
XLOC_016992	XLOC_016992	Gm9897	5:4192366-4197651	q1	q2	OK	1.01059	0.557779	-0.857433	-0.702436	0.32245	0.999686	no
XLOC_020948	XLOC_020948	Slc22a18	7:143473754-143499334	q1	q2	OK	0.681286	0.376052	-0.857328	-0.672039	0.29685	0.999686	no
XLOC_020007	XLOC_020007	Mill2	7:18839965-18858653	q1	q2	OK	1.22433	0.675842	-0.857237	-0.690304	0.30215	0.999686	no
XLOC_018133	XLOC_018133	Gbp9	5:105078393-105110292	q1	q2	OK	1.99591	1.10258	-0.856155	-0.97608	0.16225	0.999686	no
XLOC_022894	XLOC_022894	Pex11c	8:3458816-3467648	q1	q2	OK	1.20162	0.663814	-0.856126	-0.711334	0.3273	0.999686	no
XLOC_024252	XLOC_024252	Birc3	9:7848698-7873170	q1	q2	OK	1.08172	0.597913	-0.855313	-0.858664	0.2352	0.999686	no
XLOC_024232	XLOC_024232	Clec3b	9:123150945-123157432	q1	q2	OK	7.21475	3.99058	-0.85435	-0.945055	0.15705	0.999686	no
XLOC_024051	XLOC_024051	Slco2a1	9:103008488-103087849	q1	q2	OK	1.57745	0.873049	-0.853461	-0.958944	0.16655	0.999686	no
XLOC_016939	XLOC_016939	LOC100861878	4:155839679-155844102	q1	q2	OK	6.77498	3.75385	-0.851846	-0.649619	0.35885	0.999686	no
XLOC_003898	XLOC_003898	Gm16516	11:60920940-60931867	q1	q2	OK	1.05692	0.585685	-0.851667	-0.694945	0.3228	0.999686	no
XLOC_000999	XLOC_000999	Kcnj13	1:87326997-87450810	q1	q2	OK	5.52578	3.06354	-0.850977	-0.35466	0.7469	0.999686	no
XLOC_012132	XLOC_012132	Clic3	2:25456842-25458772	q1	q2	OK	1.04587	0.580183	-0.850128	-0.585142	0.4254	0.999686	no
XLOC_021578	XLOC_021578	A230057D06Rik	7:61705849-61927574	q1	q2	OK	6.78429	3.7654	-0.849395	-1.13488	0.11305	0.999686	no
XLOC_012511	XLOC_012511	LOC100862024	2:91082407-91090310	q1	q2	OK	0.686237	0.380926	-0.849195	-0.493684	0.5084	0.999686	no
XLOC_013275	XLOC_013275	6330409D20Rik	2:32721054-32755007	q1	q2	OK	2.26504	1.25792	-0.848495	-0.340441	0.71935	0.999686	no
XLOC_015118	XLOC_015118	Car14	3:95893995-95904639	q1	q2	OK	20.5638	11.4259	-0.847798	-0.712971	0.32505	0.999686	no
XLOC_015837	XLOC_015837	Nt5c1a	4:123201552-123216207	q1	q2	OK	4.48109	2.49068	-0.847311	-0.899492	0.20085	0.999686	no
XLOC_007607	XLOC_007607	4930413F20Rik	15:34572798-34679204	q1	q2	OK	0.736528	0.410061	-0.844903	-0.2377	0.76105	0.999686	no
[truncated: 24,473 more rows]

## Sheet: Sheet1
3837
7314
3750
17073
16168
18767
9893
23403
3840
33
23251
13431
20296
17696
8222
3086
21670
9609
19036
4805
444
24722
10780
12513
11091
2317
10944
6674
7003
18793
1732
17382
15678
11995
9484
19650
23803
16731
15402
10127
14843
855
10206
7120
20111
4246
4462
18142
7153
2452
4191
919
1052
18021
22637
18137
9610
8
22873
23886
24326
18973
24342
22112
11951
10903
15282
7896
18753
11225
18475
17772
12120
9580
18811
10449
10216
4851
13348
24331
1697
22339
19084
12757
18055
16355
22843
9606
16749
